# Supplementary material for: Association between Dietary Inflammatory Index and Type 2 diabetes mellitus in Xinjiang Uyghur autonomous region, China
Source: PeerJ. 2021 Jul 16;9:e11159. doi: 10.7717/peerj.11159 (PMC8288110; doi:10.7717/peerj.11159)
Supplement: File S1 [file peerj-09-11159-s001.xlsx]

## Sheet: Sheet1
ID	BMI classify	sex classify	Group(T2DM vs. Non-T2DM )	age classify	Educational level	economy	alcohol	smoke	Health	hyperhension	activity	DII	DII classify	Glucose(mmol/L)
1	3	1	0	2		3	0	1	1	0	2	-2.47598	2	3.9
2	2	1	0	3		3	0	1	1	0	2	2.60321	4	3.9
3	3	1	1	3	1	1	1	1	3	0	1	0.500314	3	7.41
4	2	1	0	2	2	2	1	1	3	1	1	-8.85324	1	4
5	3	1	0	1	2	1	2	1	1	0	2	5.651	5	5.95
6	2	2	0	2	2	3	1	1	3	0	1	-0.713568	2	4.74
7	3	2	0	1	2	2	1	1	2	0	1	-6.00313	1	5.28
8	3	2	0	3	2	1	1	1	4	1	1	3.71612	4	6
9	1	2	0	2	2	2	1	1	2	0	1	-6.15729	1	5.12
10	2	2	0	2	2	2	1	1	2	0	1	-6.15729	1	5.12
11	1	2	1	3	1	1	0	1	2	0	1	-0.066446	2	4
12	2	2	1	2	1	1	1	1	3	0	2	-1.33163	2	7.3
13	3	1	0	1	1	1	1	1	3	0	1	-8.83006	1	4
14	1	1	0	3	1	1	2	2	4	1	1	5.70549	5	4
15	3	1	0	1	2	2	3	2	3	1	2	6.7111	5	6.25
16	2	2	0	2	2	1	1	1	2	0	1	-1.2751	2	5.08
17	3	1	0	2	1	3	1	1	4	1	2	-3.70264	1	3.9
18	1	1	0	1	2	2	1	1	3	0	2	-4.69288	1	3.9
19	3	2	0	2	2	2	1	1	1	0	2	6.83599	5	6.19
20	1	1	0	1	1	1	1	1	3	0	1	0.514462	3	4
21	2	1	0	3	1	3	1	1	3	0	2	6.15705	5	3.9
22	3	1	0	1	1	2	1	1	1	0	1	2.17859	3	4
23	2	2	0	3	1	1	1	1	3	0	1	-2.66611	2	5.81
24	2	1	0	2	2	3	1	3	1	0	2	1.35281	3	5.99
25	3	1	0	1	1	2	2	3	1	0	2	1.74165	3	5.52
26	1	2	0	1	2	2	1	1	1	0	1	3.60556	4	5.9
27	2	2	0	1	2	1	1	1	1	0	1	3.43271	4	4.86
28	1	1	0	3	1	1	1	1	1	0	2	7.21183	5	3.9
29	3	1	0	1	1	2	2	3	1	0	2	2.57373	4	5.67
30	1	1	1	3	1	1	0	1	3	0	1	1.69486	3	7.25
31	3	2	0	3	1	1	1	1	4	0	1	2.55395	4	5.69
32	1	1	0	1	1	2	1	1	1	0	1	0.55055	3	4.62
33	3	1	0	2	1	2	2	1	2	0	1	-0.713608	2	4.98
34	3	1	0	1	1	2	1	3	1	0	1	7.57264	5	5.3
35	3	2	1	2	1	1	1	1	3	1	1	7.88664	5	7.14
36	1	1	1	3	1	2	1	3	4	1	1	-3.80168	1	8.78
37	2	1	0	3	1	2	1	3	2	1	1	2.68932	4	4
38	3	2	0	3	1	1	1	1	4	0	1	3.04659	4	5.45
39	1	1	0	2	1	1	1	1	4	1	1	1.35603	3	4
40	2	2	0	1	2	1	0	1	2	0	2	-5.48236	1	5.67
41	2	2	0	1	2	1	1	1	2	0	2	-8.42572	1	4.8
42	1	2	0	2	1	2	1	1	1	0	1	0.560362	3	5.53
43	3	1	0	3	1	2	1	1	2	0	1	5.48891	5	4
44	1	2	0	1	2	1	1	1	2	0	1	-2.39637	2	4.98
45	1	2	1	2	1	2	1	1	1	0	1	7.64035	5	10
46	3	2	0	2	2	3	1	1	1	0	1	6.57643	5	4.77
47	3	2	0	3	1	3	1	1	3	0	1	3.95612	4	5.3
48	3	2	1	2	2	2	1	1	1	0	1	6.88407	5	11.7
49	2	2	0	2	2	1	1	1	2	1	1	-0.346216	2	6.44
50	3	2	0	1	2	1	1	1	1	0	1	-0.215666	2	5.41
51	2	1	0	1	1	2	1	1	4	0	1	-0.650024	2	4
52	3	2	0	1	1	3	1	1	4	0	2	1.18937	3	5.85
53	3	2	0	2	1	2	1	1	2	0	1	4.29941	4	5.5
54	2	2	0	1	2	2	1	1	2	0	2	-2.27495	2	6.55
55	2	1	0	2	1	1	0	1	4	1	1	-8.22555	1	4
56	3	2	0	2	1	3	1	1	3	0	1	2.72331	4	5.94
57	3	1	0	2	1	1	1	1	3	0	2	-0.158212	2	6
58	2	2	0	2	1	1	1	1	4	0	1	-0.211859	2	5.64
59	3	1	0	1	1	1	1	1	3	0	1	0.259238	3	4
60	3	1	0	3	1	2	1	3	1	0	2	-0.951077	2	4.9
61	1	1	0	2	1	1	1	1	3	0	2	-1.56569	2	3.9
62	2	2	0	1	1	2	1	1	1	0	1	3.52552	4	4.68
63	2	2	0	2	2	2	1	1	2	0	1	-5.15515	1	6.09
64	1	1	0	1	1	2	3	3	1	0	2	2.47916	3	5.43
65	1	2	0	1	2	2	1	1	1	0	2	4.16448	4	5.16
66	1	2	0	2	2	2	1	1	1	0	1	7.85022	5	5.71
67	3	1	0	2	2	1	1	1	4	0	1	3.55699	4	4
68	2	1	0	2	1	2	2	3	1	0	1	6.23812	5	4
69	2	2	0	1	1	1	1	1	2	0	1	-0.038139	2	5.92
70	2	1	0	2	1	2	1	1	2	1	2	-0.589718	2	3.9
71	2	2	0	3	1	1	1	1	4	1	1	2.83747	4	6.29
72	3	1	0	2	1	2	2	3	1	0	2	2.02781	3	5.22
73	2	1	0	3	1	3	1	3	2	0	1	5.03935	5	4
74	2	2	1	1	1	2	1	1	4	1	1	1.44403	3	7.9
75	1	1	0	2	2	2	1	3	3	1	1	5.84041	5	5.8
76	3	2	0	2	2	2	1	1	2	0	2	-0.132994	2	4.4
77	1	2	0	2	2	2	1	1	3	1	2	-4.41613	1	5.88
78	1	1	0	3	1	1	2	1	3	1	2	3.89507	4	5.8
79	3	2	0	2	1	2	1	1	4	0	1	6.90923	5	5.22
80	3	2	0	3	1	2	1	1	1	0	1	4.0907	4	4.9
81	3	2	1	2	1	1	1	1	3	1	1	5.06187	5	6.05
82	3	1	0	2	1	3	3	3	3	1	2	1.94452	3	3.9
83	3	1	0	3		3	0	1	1	0	2	6.70052	5	3.9
84	3	2	0	3	1	2	1	1	3	0	1	0.998507	3	5.91
85	1	2	1	2	2	3	1	1	1	0	2	-0.902209	5	11.7
86	3	2	0	2	1	2	1	1	1	0	1	5.36683	5	5.91
87	2	1	0	2	2	2	2	3	1	1	2	0.363644	3	5.57
88	1	1	0	2	2	1	3	3	4	0	2	0.0878508	3	5.38
89	1	2	1	2	2	1	1	1	1	0	1	-0.726778	2	8.6
90	2	1	0	3	1	1	1	1	3	0	1	-2.36463	2	4
91	1	1	0	2	2	2	1	1	3	1	1	-5.81878	1	4
92	3	2	0	1	1	1	1	1	1	1	1	5.46565	5	5.33
93	2	2	1	2	1	1	1	1	4	0	1	1.26421	5	11
94	1	2	1	2	1	1	1	1	4	0	1	1.26421	5	11
95	2	2	1	1	2	1	1	1	1	0	1	-2.15622	2	5.62
96	1	1	0	2	2	1	2	3	1	0	3	0.914846	3	4.9
97	1	2	0	1	2	1	1	1	2	0	2	-2.96213	2	5.45
98	1	2	0	2	1	1	1	1	2	0	2	-6.0833	1	5.37
99	2	2	1	2	2	3	1	1	2	0	1	6.72169	5	10.9
100	2	1	0	2	1	3	1	3	3	0	2	1.07973	3	3.9
101	1	2	0	2	2	1	1	1	2	1	2	4.12859	4	4.97
102	1	2	0	2	1	1	1	1	2	0	1	3.72896	4	6.78
103	2	1	0	1	1	2	3	3	4	0	2	7.85436	5	5.62
104	3	1	0	1	1	2	3	3	4	0	2	-5.04201	1	5.62
105	1	2	0	2	2	3	1	1	1	0	1	-4.73475	1	5.12
106	3	1	0	3	2	1	1	3	4	1	1	-7.97673	1	6.09
107	2	2	1	2	1	3	1	1	3	0	1	2.25665	3	8.97
108	2	1	0	2	1	3	3	1	2	0	2	-1.61385	2	3.9
109	2	2	0	2	2	2	1	1	3	1	1	-3.8853	1	5.31
110	2	1	0	2	1	2	1	1	4	0	1	-0.536142	2	5.37
111	2	1	0	2	2	3	3	3	2	0	3	-2.29766	2	5.78
112	3	2	0	2	2	1	1	1	4	0	1	3.6517	4	6.08
113	2	1	0	1	1	3	3	3	1	0	2	-5.8987	1	4.99
114	2	1	0	2	2	2	1	1	1	0	1	4.83094	5	4
115	1	2	0	2	1	1	1	1	2	0	1	5.16226	5	6.53
116	2	2	0	2	1	1	1	1	2	0	1	0.262835	3	6.53
117	3	1	0	2	1	1	2	3	3	0	1	-5.24016	1	4
118	3	2	0	2	1	3	1	1	2	0	1	-0.339282	2	3.9
119	3	1	0	2	1	3	2	3	1	0	2	4.91778	5	5.19
120	1	1	0	2	1	3	0	1	1	0	2	4.91778	5	5.19
121	2	1	0	2	1	3	0	1	1	0	2	4.91778	5	5.19
122	2	2	0	1	1	2	1	1	3	0	1	-3.80442	1	4.14
123	1	2	0	2	2	3	1	1	3	0	2	-3.81222	1	5.77
124	2	2	0	2	2	3	1	1	2	0	2	-0.762209	2	5.97
125	1	1	0	1	1	2	1	1	1	0	2	-4.46193	1	3.9
126	2	2	0	1	2	1	1	1	2	0	1	-1.43997	2	6.07
127	3	2	0	2	2	1	1	1	1	0	2	-0.532751	2	5.39
128	3	2	0	3		3	0	1	1	0	2	2.7096	4	5.04
129	2	2	0	2	1	3	1	1	4	1	2	-1.15761	2	6.95
130	3	2	0	3	1	3	1	1	3	0	1	1.07044	3	5.11
131	2	1	0	2	1	2	1	1	1	0	2	5.42106	5	3.9
132	3	2	0	1	1	1	1	2	1	0	3	-0.354883	2	4.45
133	3	2	0	3	1	3	1	1	1	0	1	4.24101	4	6.11
134	3	2	0	1	2	3	0	1	1	0	2	4.76739	5	5.34
135	2	2	0	1	2	3	0	1	1	0	2	4.76739	5	5.34
136	3	2	0	1	2	3	1	1	1	0	1	4.76739	5	5.34
137	2	1	0	2	2	2	1	2	1	0	1	0.140712	3	5.89
138	2	2	0	3	1	1	1	1	3	1	1	5.35512	5	6.77
139	2	1	0	1	1	1	2	3	1	0	2	0.340813	3	3.9
140	3	2	0	2	1	1	1	1	3	0	1	-1.72602	2	6.1
141	3	1	0	2	2	2	2	1	2	0	2	0.287279	3	6.03
142	3	2	0	3	1	1	1	1	3	0	1	-3.15507	1	5.14
143	3	2	1	2	1	1	1	1	1	0	1	2.94661	5	12.3
144	2	2	0	2	2	2	1	1	3	1	1	0.138854	3	5.91
145	3	2	0	1	1	3	1	1	1	0	2	-3.26663	1	5.11
146	2	1	0	1	2	3	3	3	2	0	1	4.88204	5	6.02
147	2	2	0	3	1	2	1	1	3	1	1	5.46833	5	5.44
148	2	1	0	2	1	2	1	3	1	0	2	2.42454	3	3.92
149	2	2	0	2	2	1	1	1	4	0	1	-3.11834	1	6.53
150	3	2	0	3	1	2	1	1	4	0	1	-8.32468	1	5.53
151	3	1	0	1	2	3	1	1	3	0	1	-0.23235	2	4
152	3	2	0	3	2	1	1	1	3	0	1	7.23637	5	6.63
153	1	2	0	3	1	1	1	1	3	0	1	3.02028	4	5.83
154	1	1	1	3	1	2	1	3	1	0	1	7.80159	5	9.12
155	1	1	0	2	1	3	1	1	4	0	2	-0.0901785	2	5.25
156	3	2	0	3	1	1	1	1	3	0	1	2.72116	4	5.71
157	1	1	0	2	2	2	2	1	1	0	1	7.31499	5	4.76
158	3	2	0	2	1	3	1	1	1	0	1	5.36449	5	4.81
159	3	1	1	1	1	3	1	1	4	0	1	2.67122	4	4
160	3	2	0	3		3	0	1	1	0	2	5.95021	5	4.5
161	3	2	0	3	1	3	1	1	3	1	1	2.33754	3	5.99
162	1	2	0	3	1	3	1	1	4	1	1	2.17292	3	5.54
163	3	2	0	2	1	3	1	1	2	0	1	6.59741	5	5.49
164	1	1	0	3	1	2	1	1	1	0	1	5.19268	5	5.45
165	2	1	0	3	1	2	1	1	3	1	3	4.59069	5	4
166	3	2	0	2	2	3	1	1	2	0	1	4.28678	4	5.58
167	2	1	0	3	1	1	1	1	3	0	1	-3.93758	1	4
168	3	1	0	2	1	3	2	1	3	0	2	-3.0205	1	6.48
169	1	1	0	3	1	2	1	1	1	0	1	6.13802	5	4
170	1	1	1	2	1	2	1	1	1	1	1	2.59381	5	18.2
171	3	1	0	3	1	3	1	1	4	1	2	1.94826	3	6.07
172	3	1	0	2	2	3	0	1	2	0	2	2.32885	3	5.84
173	2	1	1	2	2	2	1	3	4	1	1	5.37515	5	10.6
174	3	1	0	2	1	3	1	1	3	1	1	6.98108	5	4
175	2	1	0	3	1	2	1	3	1	0	1	4.9845	5	4
176	1	2	0	2	1	2	1	1	3	1	1	-2.61766	2	6.67
177	3	1	1	2	1	3	1	1	4	0	1	-0.481942	2	4
178	3	2	0	2	2	1	1	1	3	0	1	6.63168	5	5.78
179	2	1	1	2	2	2	1	3	3	0	1	-3.321	1	7.15
180	2	1	1	3	2	3	1	1	3	1	1	5.19306	5	4
181	1	2	0	1	2	3	1	1	1	0	1	-5.64787	1	5.33
182	2	2	0	3	2	2	1	1	3	1	1	4.18803	4	5.4
183	2	2	0	2	2	1	1	1	3	0	1	0.255575	3	5.54
184	1	2	0	1	2	1	1	1	2	0	1	3.08523	4	5.66
185	1	1	0	2	1	3	1	1	2	0	1	3.59794	4	4.85
186	1	2	0	2	2	1	1	1	2	0	2	2.7023	4	6.08
187	2	2	0	2	2	3	1	1	1	0	1	4.48479	4	5.23
188	1	2	0	2	1	1	1	1	3	1	1	-5.35327	1	5.26
189	3	1	0	2	2	2	1	1	1	0	1	2.34559	3	4
190	1	2	0	1	1	2	1	1	4	0	2	2.51353	4	5.1
191	1	1	0	3	2	3	1	1	3	0	1	3.16516	4	6.05
192	2	1	0	3	1	1	1	1	1	0	1	3.17949	4	4
193	3	1	0	3	1	3	1	3	3	0	1	3.78887	4	4.63
194	3	1	0	3	1	2	1	1	2	0	1	-1.6258	2	4
195	2	2	1	3	2	1	1	1	1	1	1	5.11051	5	8.05
196	3	2	0	3	1	3	1	1	4	0	1	1.72278	3	6.49
197	2	1	0	2	2	2	1	3	3	1	2	-0.965018	2	5.38
198	1	2	0	3	1	1	1	1	3	1	1	7.42498	5	6.03
199	1	2	0	2	2	3	1	1	2	0	2	4.71041	5	5.51
200	1	1	0	2	1	3	2	3	2	0	2	4.22003	4	3.9
201	3	2	0	1	1	2	1	1	1	0	1	0.30416	3	5.17
202	2	1	0	1	1	1	1	1	3	0	1	5.50763	5	4
203	1	2	0	2	1	1	1	1	3	0	1	-3.42323	1	4.82
204	2	2	0	2	2	3	1	1	1	0	1	-1.90228	2	5.22
205	1	1	0	2	1	3	1	1	1	0	2	6.17196	5	6.59
206	2	2	0	1	1	2	1	1	1	1	1	3.00431	4	5.34
207	1	2	0	1	1	3	1	1	1	0	2	3.20483	4	5.28
208	1	2	0	3	1	2	1	1	3	1	1	-2.46755	2	5.62
209	1	2	0	2	1	3	1	1	3	0	1	0.098014	3	5.12
210	2	2	0	1	1	2	1	1	2	0	2	7.06858	5	5.18
211	1	1	0	2	2	1	1	1	1	0	1	2.36086	3	4
212	2	1	0	3	1	3	1	1	3	1	2	1.22598	3	3.9
213	3	1	0	2	2	1	1	1	3	0	1	2.95332	4	4
214	3	2	0	2	2	3	1	1	3	0	1	5.26014	5	5.75
215	2	1	0	3	1	2	2	3	3	0	2	-2.48216	2	4.87
216	1	2	0	2	2	1	1	1	3	0	2	5.03382	5	6.05
217	1	2	0	1	1	2	1	1	4	0	1	6.82748	5	5.03
218	2	2	0	2	1	1	1	1	3	0	1	3.56829	4	6.11
219	3	2	0	3	1	1	1	1	3	0	1	-4.07315	1	5.83
220	3	2	0	3	1	1	1	1	4	0	1	2.86242	4	5.38
221	1	2	0	3	1	1	1	1	3	0	1	2.76176	4	6.76
222	3	2	1	3	1	1	1	1	3	0	1	6.87388	5	17.5
223	1	2	0	1	1	2	1	1	1	0	1	0.470452	3	5.7
224	2	1	0	1	2	3	1	1	1	0	1	3.15243	4	4
225	2	2	0	2	1	2	1	1	3	0	1	-1.87169	2	6.74
226	3	1	1	3	1	1	1	1	3	1	1	4.36548	4	7.18
227	3	2	0	1	2	2	1	1	1	0	1	1.15738	3	4.96
228	2	2	0	2	1	2	1	1	3	1	1	6.294	5	6.25
229	1	2	0	3	1	3	1	1	3	0	1	0.574234	3	5.86
230	2	1	0	2	2	3	1	1	3	1	1	-2.29495	2	4
231	1	1	0	3	1	1	1	1	2	1	1	3.75129	4	6.72
232	1	2	0	2	1	2	1	1	1	0	1	-0.378154	2	5.1
233	1	1	0	2	1	1	1	1	2	0	2	2.91869	4	3.9
234	3	2	0	2	2	1	1	1	4	0	1	4.33424	4	6.04
235	1	1	0	2	1	3	1	1	1	0	2	4.22245	4	5.68
236	2	2	0	3	2	2	1	1	3	1	1	-6.55004	1	6.28
237	2	2	0	2	2	1	1	1	2	0	1	3.09537	4	6.07
238	2	2	0	3	1	1	1	1	2	0	1	4.12341	4	5.38
239	3	2	0	2	1	1	1	1	2	0	2	3.02766	4	5.65
240	1	1	0	2	2	3	2	1	3	1	2	4.62482	5	5.14
241	2	1	0	1	1	3	1	3	1	0	2	-7.72763	1	5.73
242	3	1	0	3	2	3	2	2	2	1	1	3.30326	4	4
243	3	2	1	2	1	2	1	1	1	0	1	-1.52007	2	8.79
244	2	2	0	1	2	2	1	1	1	0	1	3.32867	4	5.53
245	2	2	0	2	2	3	1	1	1	0	1	5.74405	5	5.24
246	3	1	0	2	1	2	1	1	4	0	1	1.28254	3	4
247	3	1	0	1	1	1	1	1	1	0	1	4.7161	5	4
248	1	1	0	3	1	2	1	3	2	1	1	-2.61447	2	4
249	2	2	0	2	2	2	1	1	1	0	1	-2.24871	2	6.22
250	3	1	0	2	1	1	1	1	1	0	1	1.96705	3	6.38
251	2	2	0	2	1	3	1	1	3	0	2	7.71011	5	5.3
252	3	2	1	3	1	1	1	1	4	1	3	2.02881	5	16.3
253	1	2	0	2	1	3	1	1	3	0	2	6.0585	5	6.1
254	3	2	0	2	1	2	1	1	3	1	1	0.588038	3	4.26
255	2	1	0	3	2	2	2	1	2	0	1	2.97987	4	5.5
256	1	1	0	3	1	1	1	1	2	0	1	2.36461	3	4
257	3	1	0	1	2	1	2	3	2	0	1	-8.44922	1	5.96
258	2	1	0	1	1	1	1	1	3	0	1	-3.08285	1	5.93
259	3	2	1	2	2	2	1	1	3	0	1	1.81312	3	7.17
260	3	2	0	1	1	1	1	1	2	1	2	2.65736	4	4.83
261	3	2	0	2	1	1	1	1	3	0	1	3.074	4	5.48
262	2	2	0	1	2	1	1	1	3	0	1	2.6594	4	5.98
263	2	2	0	2	1	1	1	1	2	0	2	3.95899	4	4.04
264	2	2	0	2	1	2	1	1	3	1	1	-3.83938	1	5.02
265	3	1	0	3	1	1	1	1	4	0	1	1.93879	3	5.09
266	3	1	0	2	2	2	1	1	4	1	2	6.63506	5	6.2
267	1	1	0	2	1	1	1	1	1	0	1	3.67325	4	4
268	1	2	0	2	1	2	1	1	2	0	1	4.68224	5	5.4
269	1	1	0	1	1	3	1	1	1	0	2	5.4662	5	5.64
270	1	2	0	1	1	2	1	1	1	0	1	1.27908	3	5.1
271	3	1	0	3	1	2	1	1	1	0	1	-7.57022	1	5.32
272	1	2	1	3	1	1	1	1	3	0	1	4.31907	5	14.1
273	3	2	0	2	1	1	1	1	4	0	1	-0.281371	2	4.37
274	2	1	0	2	1	3	1	1	3	0	1	4.31989	4	4
275	2	1	0	3	2	1	1	1	2	0	1	-8.88078	1	5.38
276	3	1	0	1	1	2	3	3	1	1	1	5.11192	5	5.35
277	3	2	0	2	2	2	1	1	3	1	1	-2.39259	2	4.94
278	3	1	0	3	1	2	1	1	2	1	1	-8.56385	1	5.26
279	1	2	0	2	2	1	1	1	2	1	1	4.58951	5	5.84
280	2	2	0	1	1	1	1	1	1	0	1	2.2514	3	5.89
281	1	2	0	1	2	3	1	1	3	0	1	1.76537	3	5.68
282	1	1	0	2	2	1	1	1	3	0	1	6.91619	5	5.26
283	1	1	0	3	1	1	1	1	3	1	1	4.53743	5	5.35
284	3	1	0	3	1	1	1	3	1	0	1	2.83609	4	5.85
285	3	1	0	2	1	2	2	3	2	0	2	-3.55421	1	4.76
286	3	1	0	2	1	2	2	3	2	0	2	-3.55421	1	4.76
287	3	2	0	3	1	2	1	1	4	1	1	-0.236821	2	6.1
288	1	1	0	1	1	3	1	1	4	0	2	3.03912	4	3.9
289	2	1	0	3	1	2	1	1	3	1	1	-4.22884	1	5.32
290	2	1	0	3	1	2	1	1	3	1	1	-4.22884	1	5.32
291	1	2	0	2	2	1	1	1	1	0	1	3.01458	4	6.08
292	1	1	0	1	2	1	1	3	1	0	2	7.81114	5	5.3
293	2	2	1	2	1	2	1	1	3	0	1	-2.51104	2	8.48
294	2	2	0	2	1	2	1	1	3	0	1	-5.036	1	5.47
295	2	2	0	2	1	2	1	1	3	0	1	-5.036	1	5.47
296	3	2	0	3	1	3	1	1	4	0	1	1.26788	3	5.32
297	2	2	0	3	1	3	1	1	4	0	1	1.26788	3	5.32
298	3	1	0	1	1	1	1	3	1	0	2	2.057	3	3.9
299	1	2	0	2	1	1	1	1	3	0	1	2.80613	4	4.78
300	1	2	0	2	2	1	1	1	4	0	1	2.07854	3	4.67
301	3	2	0	1	2	2	1	1	3	1	1	-8.80507	1	5.3
302	2	2	0	1	2	3	1	1	1	0	1	3.62774	4	5.02
303	1	2	0	1	2	3	1	1	1	0	1	3.62774	4	5.02
304	1	1	1	2	2	2	1	1	3	0	2	3.28912	5	13.1
305	2	2	0	2	2	2	1	1	3	1	1	3.03507	4	6.97
306	1	1	0	3	1	1	1	1	3	0	1	5.96096	5	4
307	2	1	0	1	2	3	1	1	1	0	1	-5.76834	1	4
308	1	1	0	3	2	2	1	3	1	0	1	2.25662	3	4
309	2	2	0	2	1	1	1	1	4	0	1	3.34461	4	5.39
310	2	1	0	2	1	2	1	1	3	1	1	-2.93645	2	4
311	2	1	0	3	1	2	1	1	1	0	1	1.58199	3	5.2
312	2	2	1	2	1	3	1	1	4	1	1	5.91724	5	5.12
313	1	2	1	2	2	3	1	1	3	1	1	0.951241	3	7.04
314	2	1	0	2	1	3	1	3	2	0	1	-5.53067	1	4
315	2	2	0	1	2	3	1	1	4	0	1	0.74497	3	5.5
316	3	2	0	1	1	3	1	1	2	0	1	1.65442	3	5.17
317	1	1	1	3	2	2	1	3	4	0	1	-1.09852	2	4.04
318	1	2	0	1	1	3	1	1	1	0	1	-0.018015	2	4.93
319	1	1	0	1	2	1	1	1	2	0	2	6.00979	5	3.9
320	2	1	0	2	2	2	1	3	2	0	1	-5.51167	1	4.57
321	2	2	0	1	1	2	1	1	4	1	1	5.44786	5	5.02
322	3	1	0	2	1	2	3	1	3	0	1	3.675	4	4.68
323	2	1	0	2	2	2	1	2	1	0	1	2.37981	3	5.74
324	1	1	0	2	1	1	1	3	2	0	1	-8.29165	1	4.57
325	1	2	1	2	1	3	1	1	4	0	1	0.263427	5	12.5
326	2	2	0	1	2	2	2	1	2	0	1	2.34823	3	5.05
327	3	1	0	1	1	3	2	3	1	0	3	2.237	3	5.87
328	1	2	0	1	1	2	1	1	3	0	1	4.44329	4	4.46
329	3	2	0	2	1	1	1	1	4	1	1	1.38636	3	5.1
330	3	1	0	3	1	3	1	3	2	1	1	3.23596	4	5.33
331	3	1	0	2	2	1	2	3	2	0	1	-4.5729	1	5.37
332	3	1	0	3	1	1	3	1	3	0	1	7.84423	5	4
333	3	2	0	2	1	1	1	1	3	1	1	7.29375	5	5.16
334	2	1	0	3	1	1	1	1	1	0	1	2.71133	4	4
335	2	1	0	3	1	1	1	1	2	0	1	5.46096	5	4
336	1	2	0	2	1	2	1	1	3	0	1	1.9787	3	5.61
337	3	2	0	2	2	1	1	1	1	0	1	-5.70406	1	6.04
338	1	2	0	3	1	1	1	1	1	1	1	3.40974	4	5.11
339	2	2	0	3	1	2	1	1	3	1	1	5.59171	5	4.63
340	2	1	0	2	2	2	3	3	3	1	1	4.22089	4	6.37
341	1	2	0	1	1	1	1	1	2	0	1	2.87712	4	5.15
342	2	2	0	2	1	3	1	1	3	0	1	6.72987	5	5.44
343	1	2	0	1	1	2	1	1	1	0	1	5.95728	5	5.18
344	1	2	0	2	1	1	1	1	2	0	1	-0.144388	2	5.8
345	1	2	0	2	2	1	1	1	1	0	1	5.50238	5	5.17
346	2	2	0	2	1	2	1	1	1	0	1	1.60547	3	5.96
347	2	1	0	1	2	2	1	1	1	0	2	-3.61338	1	5.25
348	1	2	0	1	1	2	1	1	2	0	1	2.29465	3	4.2
349	1	1	0	2	1	3	1	1	1	0	2	0.00145841	2	3.9
350	1	1	0	2	1	1	1	1	1	0	2	0.500857	3	3.9
351	1	1	0	2	1	1	1	3	1	1	1	3.33156	4	5.08
352	1	1	0	2	1	3	1	3	2	0	1	4.86131	5	6.04
353	2	1	0	1	1	1	1	1	1	0	1	4.45329	4	4
354	3	2	0	1	2	1	1	1	1	0	1	-2.75978	2	5.5
355	3	1	1	1	1	1	3	3	2	0	2	8.07641	5	7.23
356	1	1	0	2	1	1	2	3	2	0	3	-4.30247	1	6.05
357	3	2	0	2	2	3	1	1	1	0	1	-4.80618	1	5.71
358	3	2	0	2	1	1	1	1	1	0	1	4.91156	5	5.42
359	3	2	0	1	2	2	1	1	2	0	1	-0.961401	2	4.5
360	2	2	0	1	2	2	1	1	2	0	1	-2.99605	2	5.47
361	2	2	0	2	2	2	1	1	3	0	1	-1.95457	2	5.48
362	3	1	1	2	1	2	1	1	3	0	2	-1.46124	5	11.4
363	2	2	0	2	2	3	1	1	3	0	1	-1.287	2	5.72
364	2	2	0	2	2	3	1	1	3	0	1	3.48641	4	6.61
365	3	2	0	2	2	2	1	1	3	1	1	-0.107486	2	6.08
366	2	1	0	3	1	1	1	3	3	0	2	0.237646	3	5.5
367	2	2	1	1	2	1	1	1	1	0	2	0.684746	3	8.81
368	1	2	0	2	2	2	1	1	2	1	1	-7.1488	1	6.96
369	1	2	0	2	1	1	1	1	3	1	1	5.00463	5	5.47
370	3	1	0	2	1	2	2	3	1	0	2	0.980288	3	4.75
371	1	2	0	2	2	2	1	1	1	0	1	5.16493	5	6.35
372	2	1	0	2	1	2	1	1	2	0	1	4.29759	4	4
373	2	2	1	2	1	3	1	1	4	1	1	2.99186	4	7.11
374	1	1	0	1	2	3	1	1	3	0	1	1.69696	3	4
375	3	1	0	3	1	1	1	3	1	0	1	-1.25398	2	5.15
376	2	1	0	2	1	2	3	3	1	0	2	-4.02078	1	4.72
377	1	1	0	2	1	3	2	2	1	0	2	1.19751	3	6.07
378	2	2	1	3	1	3	1	1	3	1	1	5.08608	5	11.9
379	2	2	0	3	2	1	1	1	3	0	1	-4.02082	1	6.08
380	1	2	0	2	2	3	1	1	3	0	1	1.23496	3	5.13
381	1	2	0	2	1	1	1	1	2	0	1	5.63775	5	4.88
382	2	1	0	2	1	2	1	1	1	0	1	7.27467	5	4
383	2	1	0	2	2	1	1	1	2	0	1	7.31541	5	4
384	1	1	0	3	1	2	1	2	3	0	1	-0.594867	2	5.69
385	3	2	0	1	2	2	1	1	1	0	1	-6.09216	1	5.51
386	3	1	0	1	2	2	1	1	2	0	1	7.65793	5	4
387	1	2	0	1	1	2	1	1	2	0	1	6.91024	5	4.59
388	2	1	0	2	1	1	1	1	3	1	1	-2.64454	2	4
389	2	2	0	1	1	1	1	1	1	0	1	6.69231	5	4.8
390	3	2	0	1	2	2	1	1	1	0	1	-4.31588	1	5.08
391	2	1	1	3	2	2	1	1	3	0	1	7.33527	5	4
392	3	2	0	1	1	3	1	1	1	0	1	4.0428	4	4.48
393	1	1	0	2	2	2	1	1	1	0	1	-5.35444	1	4
394	1	1	0	1	1	2	1	1	2	0	1	-4.04515	1	4
395	2	1	0	3	1	2	1	1	4	1	2	6.47052	5	6.58
396	2	1	0	1	1	2	1	1	2	0	2	7.08885	5	3.9
397	2	2	0	3	1	1	1	1	3	0	1	6.88366	5	5.84
398	3	1	0	3	2	1	1	1	3	1	1	1.32952	3	4
399	1	2	0	2	1	3	1	1	4	1	1	5.32086	5	6.19
400	3	1	0	3	1	1	1	1	3	0	1	5.3139	5	4
401	1	2	1	3	2	1	1	1	4	1	1	1.15932	3	5.3
402	3	2	0	1	1	3	1	1	1	0	2	2.67382	4	5.37
403	2	1	0	3	1	3	1	1	3	0	1	6.97299	5	4
404	3	1	0	1	1	1	2	3	3	0	1	-0.341965	2	5.19
405	1	1	0	2	2	1	1	3	1	0	2	5.84529	5	5.24
406	3	1	0	3	2	1	1	1	3	0	1	0.695372	3	6.05
407	2	1	0	3	1	1	1	1	3	1	1	-2.81458	2	5.35
408	3	2	0	2	1	3	1	1	1	0	1	5.36868	5	5.32
409	3	2	0	1	1	1	1	1	1	0	1	1.50521	3	5.76
410	2	1	0	3	1	2	1	1	1	0	2	-2.15378	2	5.3
411	3	2	0	1	1	2	1	1	1	0	2	0.443673	3	4.96
412	1	2	0	2	2	3	1	1	3	1	2	-4.14796	1	6.07
413	3	1	1	2	2	3	1	1	2	0	3	3.87605	4	8.38
414	2	2	0	1	1	2	1	1	2	0	1	-1.77215	2	4.7
415	2	2	0	1	2	2	1	1	1	0	1	4.30243	4	6.03
416	1	1	0	2	2	2	1	1	1	0	2	-3.03638	1	3.9
417	1	1	0	2	1	2	2	3	1	0	1	0.615508	3	4
418	3	1	0	2	2	1	2	3	2	0	3	3.47417	4	4
419	1	2	0	1	1	3	1	1	1	0	1	1.4712	3	4.63
420	1	2	0	2	2	1	1	1	2	0	1	2.39063	3	4.84
421	3	2	0	2	1	2	1	1	1	0	1	4.2324	4	4.72
422	2	1	0	1	1	2	3	3	1	0	1	4.52326	5	4.8
423	2	1	0	1	1	2	1	3	1	0	1	5.23142	5	4
424	2	2	1	2	1	1	1	1	3	1	1	6.18561	5	15.6
425	3	2	0	2	1	1	1	1	2	0	1	3.38918	4	4.98
426	3	2	1	2	1	1	1	1	2	1	1	3.71679	4	7.04
427	2	2	0	1	1	2	1	1	1	0	1	2.55227	4	5.71
428	1	1	0	2	2	3	1	1	4	1	2	5.81877	5	3.9
429	3	1	0	2	2	2	1	1	2	0	1	2.05119	3	4
430	2	2	0	2	1	2	1	1	2	1	1	4.46198	4	5.1
431	3	2	0	1	1	1	1	1	2	0	1	5.09679	5	4.5
432	2	2	0	2	1	2	1	3	2	1	1	-8.37157	1	5.33
433	2	1	1	3	1	3	1	2	2	0	1	4.10026	4	7.85
434	2	1	0	1	1	1	2	3	2	1	2	-5.33523	1	3.9
435	2	1	0	3	1	3	1	3	3	1	2	-4.22905	1	5.59
436	3	1	0	2	3	3	1	1	2	0	1	7.01027	5	4
437	1	1	0	2	1	2	1	1	2	0	3	1.96901	3	6.22
438	2	1	0	3	1	3	2	1	3	1	2	0.637501	3	4.73
439	3	2	0	1	1	2	1	1	1	0	1	4.47797	4	5.76
440	2	1	0	1	1	3	2	2	3	0	2	-0.450215	2	5.34
441	1	1	0	2	1	2	3	3	3	0	2	2.85947	4	4.93
442	3	2	0	3	1	1	1	1	3	1	1	4.99597	5	5.1
443	2	2	0	2	2	2	1	1	2	0	1	4.31606	4	6.36
444	1	1	1	1	1	2	1	3	3	0	2	3.10076	4	7.48
445	1	2	0	1	2	3	1	1	1	0	1	1.16021	3	4.73
446	2	2	0	3	1	2	1	1	2	0	1	4.24969	4	6
447	2	2	0	1	1	3	1	1	1	0	1	3.36054	4	4.78
448	1	1	0	2	1	2	1	3	2	0	1	-0.339593	2	5.07
449	2	1	0	1	1	2	3	3	3	0	2	-0.443358	2	4.42
450	2	1	0	1	1	2	2	3	1	0	1	4.70592	5	4.93
451	2	2	0	3	1	2	1	1	3	1	1	-0.787729	2	5.37
452	2	2	0	1	1	1	1	1	3	0	1	2.49552	4	5.88
453	3	1	0	1	1	3	2	2	4	0	1	-3.19073	1	5.33
454	1	2	0	1	1	2	1	1	2	0	1	4.16974	4	5.29
455	2	2	0	3	1	1	3	1	2	1	1	-1.50577	2	5.65
456	2	2	0	3	1	1	1	1	2	0	1	3.60762	4	4.76
457	2	1	0	2	1	3	2	2	1	0	2	4.40389	4	5.45
458	3	1	0	2	1	3	1	2	2	1	1	2.51569	4	5.97
459	1	1	0	2	2	1	1	1	2	1	1	4.1028	4	4.83
460	1	1	0	1	2	3	1	3	1	0	1	6.46352	5	5.79
461	3	1	0	2	1	2	1	1	2	0	2	6.66726	5	6.03
462	3	1	0	2	2	2	1	1	1	0	1	5.05079	5	5.77
463	2	2	1	2	2	2	1	1	3	1	1	-3.38387	1	7.71
464	2	2	0	2	2	3	1	1	1	0	1	-1.47158	2	4.37
465	2	2	0	1	3	2	1	1	2	0	1	3.87497	4	5.5
466	2	2	0	2	1	2	1	1	2	0	1	1.53552	3	5.33
467	1	1	0	1	2	2	3	3	2	0	1	4.2543	4	4.21
468	3	1	0	2	2	2	2	3	1	1	1	3.31144	4	4.29
469	3	1	0	3	1	2	1	1	3	0	1	5.14558	5	4
470	3	2	0	3	1	2	1	1	2	0	1	4.98419	5	5.04
471	3	2	0	2	1	2	1	1	3	0	2	4.60167	5	5.12
472	2	2	0	2	1	1	1	1	2	1	1	4.76698	5	4.83
473	1	2	0	2	1	3	1	1	1	0	1	-0.133465	2	5.44
474	3	2	0	2	1	2	1	1	3	0	1	-5.94905	1	5.7
475	1	1	0	1	2	2	1	1	3	0	1	5.16581	5	4
476	1	2	1	2	2	1	1	2	2	0	1	0.855707	3	8.95
477	3	2	0	3	1	1	1	1	3	1	1	-6.31365	1	4.67
478	1	2	0	1	1	2	1	1	2	0	1	4.48922	4	5.42
479	1	1	0	2	1	2	2	3	3	1	2	5.59323	5	5.55
480	3	2	0	1	1	1	1	1	2	0	1	-0.111916	2	4.98
481	3	1	0	1	2	3	2	1	1	0	2	-5.58735	1	5.42
482	1	2	0	3	1	3	1	1	3	1	1	-5.05745	1	5.89
483	2	2	0	1	1	2	1	1	2	0	1	3.21692	4	4.07
484	3	1	0	1	1	2	1	3	1	0	2	-2.92706	2	4.96
485	3	1	0	1	1	2	1	1	3	0	1	-5.54542	1	4.96
486	2	2	0	3	1	2	1	1	3	0	1	5.10056	5	5.86
487	1	2	0	3	1	2	1	1	3	0	1	5.10056	5	5.86
488	3	2	0	1	1	2	1	1	2	0	1	3.43409	4	5.53
489	3	2	0	2	2	2	1	1	4	0	1	-6.36944	1	5.43
490	2	2	0	2	1	2	1	1	3	1	1	-3.67541	1	6.82
491	1	2	0	2	2	3	1	1	3	0	1	0.0173839	2	5.59
492	2	1	0	2	1	1	2	3	2	0	1	1.81131	3	4
493	3	1	0	1	1	3	2	3	3	0	2	0.923268	3	5.33
494	3	1	0	1	1	2	1	3	1	0	1	4.72409	5	5.03
495	1	2	0	2	1	2	1	1	3	1	1	0.845148	3	5.92
496	3	2	0	3	1	2	1	1	3	1	1	5.43073	5	5.83
497	3	1	0	2	1	2	1	3	2	0	2	7.01124	5	5.01
498	2	1	0	2	1	2	1	1	1	1	1	4.82327	5	5.74
499	2	2	1	2	1	2	1	1	2	0	1	2.61758	4	7.04
500	1	1	0	1	1	2	1	3	1	0	1	4.14719	4	4
501	2	1	0	3	1	1	1	1	3	0	1	3.51233	4	5.91
502	2	1	0	1	2	3	1	1	3	0	1	1.47113	3	4
503	2	2	0	2	1	1	1	1	2	0	1	1.0938	3	4.83
504	2	2	0	2	2	2	1	1	1	0	1	3.12039	4	5.75
505	2	1	0	2	1	2	1	3	3	1	1	0.499129	3	4.81
506	3	2	0	3	2	2	1	1	1	0	1	4.70276	5	5.61
507	1	2	1	3	1	1	1	1	3	0	1	6.78571	5	7.51
508	3	1	0	1	1	2	1	3	1	0	1	3.90664	4	6.49
509	2	1	0	1	1	3	2	1	3	0	2	-1.07849	2	5.36
510	2	1	0	3	1	1	1	2	3	0	1	4.19127	4	5.19
511	3	2	0	2	1	2	1	1	2	0	1	4.68454	5	5.98
512	1	1	0	1	1	2	2	3	2	0	1	-8.06197	1	5.45
513	3	1	0	3	1	2	1	1	2	0	1	6.48335	5	5.16
514	1	1	0	2	2	2	2	3	2	0	1	-0.179497	2	5.51
515	1	2	0	2	1	3	1	1	3	1	1	0.214246	3	5.37
516	2	2	0	2	1	1	1	1	3	1	1	3.3954	4	5
517	1	2	0	3	1	3	1	1	2	0	1	-2.33966	2	5.23
518	3	1	0	3	1	1	1	1	3	0	1	6.25013	5	4
519	2	2	0	2	2	3	1	1	1	0	1	2.74872	4	5.52
520	3	1	0	2	1	2	1	1	3	1	1	0.805366	3	4
521	2	1	0	2	2	2	1	1	3	0	1	2.59481	4	4
522	2	1	0	1	3	3	2	3	2	0	1	0.710072	3	4
523	1	2	0	1	2	2	1	1	3	0	1	-6.67735	1	5.39
524	2	1	1	1	1	2	2	3	2	0	2	4.21783	4	6.8
525	1	1	0	1	1	3	2	1	1	0	2	-2.2833	2	6.07
526	2	1	0	2	1	2	2	3	1	1	1	2.69288	4	6.03
527	1	1	0	1	1	2	1	1	3	0	1	3.06506	4	5.3
528	3	2	0	1	1	1	1	1	1	0	1	3.07976	4	6.02
529	3	1	0	3	1	1	1	1	2	0	1	1.87859	3	4.97
530	1	1	0	3	1	3	1	1	4	1	2	1.66158	3	6.9
531	1	2	0	2	2	2	1	1	2	1	2	-3.11682	1	5.67
532	2	1	0	2	1	1	1	3	3	0	1	4.32891	4	4.14
533	3	1	0	1	1	1	1	1	3	0	1	1.75313	3	4
534	3	2	0	2	1	2	1	1	2	1	1	5.14786	5	5.64
535	3	2	0	2	1	2	1	1	2	1	1	3.43794	4	4.91
536	3	2	0	2	1	3	1	1	3	0	1	1.7695	3	5.85
537	3	2	0	3	1	1	1	1	3	0	1	-6.32895	1	5.13
538	3	2	1	3	1	3	1	1	3	1	1	4.26382	5	14.2
539	2	2	0	1	2	2	1	1	2	0	3	3.94501	4	5.1
540	3	2	0	3	1	2	1	1	3	1	1	3.50987	4	6.2
541	3	2	0	1	1	3	1	1	3	0	2	4.69176	5	5.22
542	3	2	0	2	1	3	1	1	1	0	1	3.40285	4	6.08
543	3	2	0	2	1	2	1	1	1	0	1	3.26215	4	4.7
544	3	2	0	1	1	2	1	1	2	0	1	4.83762	5	5.67
545	3	2	1	2	2	2	1	1	4	1	1	-3.60145	5	13.3
546	3	2	1	3	1	2	1	1	4	1	1	6.95098	5	9.7
547	1	2	0	1	1	2	1	1	2	0	1	2.1832	3	5.3
548	2	2	0	2	2	3	1	1	1	0	1	2.21258	3	5.05
549	1	2	0	2	2	1	1	1	3	1	1	6.04746	5	5.72
550	1	1	0	1	1	1	2	3	2	0	2	-7.34426	1	4.89
551	3	1	0	2	1	3	1	2	1	0	2	3.88594	4	5.72
552	2	2	0	1	2	2	1	1	2	0	2	2.34936	3	5.19
553	3	2	0	3	1	2	1	1	4	1	1	-4.78963	1	6.64
554	2	1	0	1	1	2	1	1	2	0	2	-4.36424	1	3.9
555	2	2	1	3	1	2	1	1	3	1	1	2.76371	4	6.9
556	2	1	0	3	1	2	2	3	1	1	1	-3.74578	1	5.17
557	2	1	0	2	1	2	1	1	3	0	1	-1.72173	2	5.2
558	2	2	0	2	2	2	1	1	2	0	1	-4.80088	1	5.76
559	2	2	0	1	1	2	1	1	1	0	1	-1.86137	2	5.32
560	3	2	0	1	1	3	1	1	3	0	2	-0.507467	2	5.11
561	2	1	0	1	1	1	1	1	2	1	1	4.17603	4	4
562	3	1	0	3	1	2	1	1	3	1	1	-6.38717	1	4
563	3	2	0	3	1	1	1	1	2	0	1	4.41458	4	5
564	1	1	0	3	1	2	1	1	2	1	1	7.12839	5	5.08
565	1	2	1	3	1	3	1	1	1	0	1	4.16673	4	8.67
566	3	2	0	2	1	2	1	1	3	0	1	-4.45427	1	5.73
567	3	2	0	2	2	2	1	1	4	0	1	2.15411	3	5.88
568	2	1	0	3	2	2	1	1	1	0	1	-5.77748	1	4
569	3	2	0	2	1	2	1	1	3	0	1	-7.13039	1	5.55
570	3	2	0	1	2	1	0	1	1	1	2	3.85556	4	4.74
571	2	1	0	1	1	2	1	3	1	0	2	6.85116	5	5.7
572	3	1	0	2	1	1	1	1	3	1	1	1.08882	3	4
573	1	2	0	1	2	2	1	1	1	0	2	3.60249	4	5.22
574	2	2	0	3	2	1	1	1	1	1	1	3.04911	4	5.6
575	1	1	0	2	2	2	1	3	2	0	1	2.71225	4	4
576	3	2	0	1	2	2	1	1	4	0	3	3.3629	4	6.85
577	3	1	0	1	1	1	1	3	4	0	1	-0.977254	2	4.89
578	1	1	1	3	2	1	1	1	3	1	1	3.29423	4	4
579	1	1	0	2	3	3	1	1	2	0	1	7.39118	5	4
580	2	1	0	1	2	2	1	1	1	0	1	-3.81801	1	4
581	2	2	0	1	2	2	1	1	2	0	1	4.70276	5	5.87
582	2	2	0	1	1	1	1	1	3	0	1	4.15584	4	5
583	2	1	0	1	1	2	2	3	1	0	1	4.69485	5	4
584	2	1	0	1	1	3	2	2	4	0	2	0.726284	3	5.8
585	1	1	0	1	2	3	2	3	1	0	3	-7.13044	1	5.7
586	2	2	0	1	2	3	1	1	3	0	2	-0.341441	2	4.86
587	1	1	0	3	2	1	1	2	3	0	1	-4.4493	1	5.41
588	1	1	0	2	2	2	2	1	1	0	1	3.6705	4	4
589	1	1	0	1	2	3	1	1	3	0	2	1.44049	3	3.9
590	2	2	0	1	1	1	1	1	2	0	2	5.60441	5	4.9
591	1	1	0	1	2	1	1	1	2	0	2	4.81525	5	3.9
592	2	2	0	1	2	3	1	1	1	0	2	-3.02716	1	5.46
593	1	2	0	3	1	2	1	1	3	0	1	0.506782	3	5.62
594	1	2	0	1	1	3	1	1	3	0	1	0.880283	3	4.2
595	2	1	0	1	2	2	1	1	2	0	3	-7.92045	1	4.7
596	3	1	0	2	2	3	2	2	1	0	2	-0.340458	2	4.4
597	3	1	0	2	2	2	2	3	2	1	2	6.74473	5	3.9
598	1	1	1	2	1	2	1	3	3	0	1	3.58348	5	15.3
599	1	2	0	2	1	2	1	1	1	1	1	1.20303	3	6.95
600	3	1	0	1	2	3	2	3	1	0	2	-7.26751	1	5.03
601	2	2	0	1	1	1	1	1	2	0	2	4.06865	4	5.61
602	2	2	0	2	1	1	1	1	3	0	1	-7.96605	1	4.74
603	2	2	0	2	1	3	1	1	1	1	1	4.64313	5	5.5
604	3	1	0	2	1	2	1	1	1	0	1	4.56581	5	4
605	3	1	0	2	2	2	1	1	2	1	1	4.54084	5	4
606	1	2	0	3	1	2	1	1	4	1	1	-4.35732	1	5.37
607	1	2	0	3	1	1	1	1	2	1	1	7.87222	5	4.84
608	3	1	0	3	1	1	1	3	1	1	1	-5.62151	1	4.74
609	2	2	0	2	2	2	1	1	2	0	1	0.373553	3	5.01
610	1	2	0	1	1	2	1	1	1	0	1	-4.15853	1	5.41
611	1	2	0	3	1	2	1	1	3	0	1	7.19784	5	4.7
612	3	2	0	1	1	2	1	1	2	0	1	-3.57053	1	4.84
613	1	1	0	1	2	3	2	2	1	0	2	0.309894	3	4.9
614	1	1	0	1	1	3	2	3	1	0	2	-2.0993	2	4.22
615	1	1	0	1	1	1	2	3	2	0	3	-5.01328	1	4.35
616	3	1	0	2	1	1	1	1	2	1	1	4.76309	5	5.9
617	2	2	0	2	1	1	1	1	2	1	1	3.53033	4	5.4
618	3	2	0	1	1	2	1	1	3	0	1	-4.07243	1	6.94
619	1	2	0	3	1	2	1	1	2	0	1	6.82477	5	5.85
620	2	1	0	1	2	2	2	1	2	0	3	6.60653	5	4.4
621	1	1	1	2	1	3	1	2	4	1	2	-0.143698	2	7.57
622	2	1	0	2	2	3	2	3	1	0	1	-3.72707	1	6.87
623	1	1	0	2	1	2	1	1	3	0	1	-5.29149	1	4
624	1	1	0	3	1	2	1	1	3	0	1	-2.12039	2	4
625	3	2	0	1	1	2	1	1	2	0	1	-2.28849	2	5.73
626	1	1	0	1	2	1	1	1	2	0	1	4.5044	4	4
627	1	2	0	2	1	3	1	1	4	1	1	-0.502052	2	6.04
628	1	1	0	2	1	2	1	3	1	0	1	5.72785	5	5.88
629	3	2	0	2	1	1	1	1	2	1	1	2.18901	3	5.65
630	3	2	0	1	1	3	1	1	1	0	1	1.15206	3	5.78
631	2	2	0	1	1	2	1	1	2	0	1	4.41515	4	6.31
632	3	1	0	2	1	2	1	1	1	1	1	-7.98263	1	4
633	2	2	0	2	1	2	1	1	3	0	1	0.453605	3	5.44
634	3	1	0	3		2	2	3	2	0	1	1.95652	3	5.3
635	1	1	0	3	1	2	1	3	3	0	1	3.54529	4	4.38
636	1	2	0	2	1	2	1	1	3	0	1	5.42252	5	4.76
637	2	2	0	2	1	2	1	1	1	0	1	6.20959	5	5.75
638	1	2	0	1	1	1	1	1	2	0	1	4.79216	5	4
639	2	2	0	2	1	3	1	1	3	0	1	3.50126	4	6.03
640	3	1	0	2	1	2	2	3	3	0	1	2.23414	3	4.91
641	2	2	1	1	2	2	1	1	2	0	1	-7.57674	1	7.6
642	3	2	0	3	1	2	1	1	3	1	1	-3.88629	1	5.06
643	3	2	0	1	2	2	1	1	1	0	1	6.99662	5	5.22
644	3	2	0	2	1	3	1	1	1	0	1	4.07202	4	6.29
645	2	1	1	2	2	1	2	3	2	0	2	5.72754	5	8.04
646	1	1	0	1	2	2	2	1	3	0	1	2.05936	3	5.6
647	2	1	0	2	1	2	1	3	1	0	2	5.3809	5	5.09
648	1	2	0	1	1	2	1	1	1	0	1	4.93023	5	5.11
649	1	2	1	2	2	1	1	1	3	0	1	7.4466	5	7
650	1	1	0	2	1	2	2	3	2	0	2	5.60755	5	4.67
651	3	1	0	1	2	3	2	1	1	0	2	0.863114	3	4.98
652	1	1	0	2	2	2	2	3	1	0	1	4.14666	4	5.33
653	3	1	0	1	2	2	2	2	2	0	1	-7.56542	1	5.1
654	3	1	0	2	1	1	2	3	1	0	2	3.54183	4	4.85
655	2	1	0	2	1	2	1	1	3	0	1	-0.990493	2	4
656	3	2	0	1	1	2	1	1	2	0	1	-6.92547	1	4.85
657	3	2	0	1	1	3	2	3	3	0	1	2.98118	4	5.75
658	2	2	0	3	1	2	1	3	1	1	1	6.49641	5	5.89
659	2	1	0	2	1	2	1	3	1	0	1	6.17927	5	4
660	1	1	0	2	2	2	3	3	1	0	1	4.66386	5	4.63
661	2	1	0	1	1	2	1	1	2	0	1	-4.59324	1	4
662	3	1	0	1	1	2	2	3	2	0	3	2.27623	3	4
663	1	1	0	1	1	2	1	1	1	0	1	4.74912	5	5.69
664	1	2	0	1	1	3	1	1	2	0	1	4.85852	5	4.6
665	1	1	0	1	2	2	2	3	1	0	1	4.81755	5	5.09
666	2	1	0	2	1	2	2	3	1	0	3	3.23789	4	6.05
667	1	2	0	2	1	1	1	1	3	1	1	5.33631	5	5.3
668	1	1	0	3	1	2	1	3	1	0	1	-6.72417	1	5.31
669	1	2	0	2	1	3	1	1	3	0	1	1.5914	3	5.48
670	1	1	0	2	1	2	2	3	3	0	1	-3.99127	1	4.88
671	2	1	0	1	2	2	1	1	1	0	1	7.60994	5	4.13
672	1	1	0	1	2	2	2	3	1	0	1	6.4913	5	5.49
673	1	2	0	2	1	2	1	1	3	0	1	-3.47073	1	5.93
674	3	2	0	1	1	2	1	1	2	1	1	4.53562	5	4.57
675	2	2	0	2	1	1	1	1	2	0	1	4.51951	4	5.03
676	3	1	0	1	1	2	2	3	1	0	1	6.64414	5	4.82
677	2	1	0	2	1	2	2	3	1	0	1	4.41379	4	5.53
678	2	2	0	1	1	3	1	1	1	0	1	-0.02231	2	5.41
679	3	1	0	2	2	3	1	1	1	0	3	5.06927	5	4
680	1	2	0	1	1	2	1	1	2	0	1	-1.73117	2	4.26
681	3	2	0	2	1	2	1	1	2	0	1	-5.04809	1	6.04
682	1	1	0	1		3	0	1	1	0	2	2.21908	3	3.9
683	1	1	0	2	1	2	1	3	1	0	3	5.22335	5	4.28
684	3	1	0	2	1	1	2	3	1	1	2	4.4009	4	5.61
685	3	2	0	2	1	3	1	3	1	0	1	4.73717	5	5.36
686	1	1	0	1	1	1	1	1	2	0	1	5.91022	5	4
687	2	1	0	1	1	2	2	3	1	0	1	-3.1782	1	5
688	3	2	0	1	2	2	1	1	1	0	1	5.0578	5	5.5
689	3	1	0	1	1	2	1	3	1	0	2	5.84656	5	5.32
690	2	2	0	2	1	3	1	1	3	1	1	3.34623	4	4.42
691	2	1	0	1	2	2	2	3	1	0	1	-6.07557	1	5.98
692	1	2	0	2	2	2	1	1	2	0	1	4.36532	4	6.82
693	3	1	0	1	2	2	1	1	1	1	1	-7.68797	1	4
694	3	2	0	1	1	2	1	1	2	0	1	4.49709	4	4.32
695	1	2	0	2	1	3	1	1	4	1	1	3.97026	4	5.17
696	3	1	0	3	1	2	1	1	3	1	1	-1.2798	2	6.21
697	1	1	0	2	2	1	2	3	2	0	2	4.66524	5	5.47
698	3	2	0	2	1	2	1	1	3	1	1	-7.69119	1	5.72
699	3	1	0	2	1	1	1	1	2	0	2	6.49288	5	3.9
700	3	2	0	2	1	3	1	2	3	0	1	2.19597	3	5.12
701	2	2	0	2	1	2	1	1	2	0	3	3.19937	4	5.21
702	1	2	0	2	3	3	1	1	1	1	1	7.02676	5	5.4
703	3	2	0	2	1	2	1	1	3	1	1	5.91601	5	5.97
704	2	2	0	2	1	2	1	1	3	0	1	-0.787405	2	4.68
705	3	2	0	2	2	3	1	1	1	0	1	1.48356	3	6.25
706	3	1	0	2	1	2	1	3	2	0	2	2.18278	3	4.94
707	3	1	0	2	1	2	1	1	2	0	1	6.60552	5	4
708	2	1	0	2	1	3	2	1	3	0	2	1.51224	3	4.79
709	2	1	0	2	2	2	1	1	3	1	1	-2.48098	2	4
710	1	2	0	2	2	2	1	1	2	0	3	3.13832	4	5.92
711	1	1	0	2	1	2	1	1	3	0	1	-7.8488	1	6.6
712	3	1	1	1	1	2	1	3	3	0	1	8.79289	5	17.2
713	3	2	1	2	1	2	1	1	3	1	1	5.22795	5	8.33
714	3	1	0	2	2	2	2	3	1	0	1	4.25699	4	5.63
715	1	2	0	1	2	2	1	1	1	0	1	4.46713	4	5.47
716	3	1	0	2	2	3	2	3	1	0	2	1.86194	3	5.46
717	2	1	0	2	1	2	1	1	1	1	1	4.4934	4	5.4
718	2	1	1	3	1	2	3	1	3	0	1	-0.236629	2	8.17
719	3	1	0	2	2	2	2	3	2	0	2	7.43315	5	5.17
720	1	2	0	2	1	2	1	1	3	0	1	-0.021263	2	5.65
721	3	1	0	2	1	3	2	1	1	0	2	0.164065	3	5.28
722	2	2	1	2	1	2	1	1	1	1	1	2.96161	5	10.5
723	1	2	0	2	2	1	1	1	3	0	1	-7.35896	1	5.34
724	1	2	0	2	1	3	1	1	3	0	1	-0.170065	2	5.56
725	3	2	0	1	1	2	1	1	3	1	1	0.461693	3	6.04
726	2	2	0	1	2	2	1	1	1	0	1	4.01221	4	5.46
727	1	2	0	2	2	3	1	1	1	0	2	-0.0735117	2	6.09
728	2	2	0	1	1	2	1	1	3	0	1	-1.62372	2	5.54
729	1	1	0	1	1	2	1	1	3	0	1	-1.5651	2	5.48
730	2	2	0	2	1	1	1	1	2	0	1	3.73322	4	5.81
731	1	2	0	2	2	3	1	1	1	0	1	3.79274	4	5.36
732	2	1	0	3	1	2	1	1	2	0	1	4.4934	4	4
733	1	2	0	2	1	2	1	1	2	0	1	3.97005	4	5.9
734	2	2	0	2	2	2	1	1	1	0	1	6.16075	5	5.7
735	1	1	0	1	2	2	2	1	1	0	1	2.11628	3	5.61
736	3	2	0	3	2	2	1	1	4	0	1	4.78088	5	6.46
737	2	2	0	2	1	3	1	1	3	0	1	1.65864	3	6.34
738	1	2	0	2	1	2	1	1	3	0	1	-2.61235	2	4.61
739	1	2	0	1	1	1	1	1	2	0	1	7.38866	5	5.53
740	3	1	0	1	1	2	1	1	2	0	1	5.48499	5	4
741	1	1	0	1	1	2	3	3	2	0	2	4.22985	4	3.9
742	3	1	0	2	1	3	1	1	4	0	1	0.414887	3	4
743	1	2	0	1	1	2	1	1	4	1	1	1.15652	3	4
744	2	1	0	1	1	2	1	1	2	1	1	5.38867	5	4
745	2	2	1	2	1	2	1	1	3	1	1	4.40991	4	5.31
746	2	1	0	2	2	2	1	1	3	0	2	-4.96974	1	3.97
747	2	2	1	2	1	3	1	1	4	1	1	2.44882	3	4.73
748	1	1	0	3	1	1	1	1	1	0	2	1.84714	3	3.9
749	3	2	0	1	1	2	1	1	1	0	1	-2.79766	2	4.2
750	2	2	0	3	1	2	1	1	2	0	1	5.71553	5	5.53
751	1	1	0	2	2	2	1	1	1	0	2	2.56719	4	3.9
752	1	2	0	1	2	3	1	1	1	0	1	-0.178587	2	4
753	2	1	0	3	1	3	1	1	1	0	1	0.548924	3	4
754	3	2	0	1	1	2	1	1	2	1	1	2.25841	3	4.34
755	2	1	0	1	1	2	2	3	1	0	1	0.532535	3	4.13
756	1	2	0	1	1	2	1	1	2	0	1	4.82987	5	4
757	3	2	0	1	1	3	1	1	1	0	1	-0.608881	2	4.76
758	3	2	1	3	1	2	1	1	2	0	1	-2.73679	2	8.34
759	2	1	0	1	1	2	1	1	3	0	1	-6.89689	1	6.24
760	3	1	0	1	1	3	1	1	3	0	1	-8.474	1	4.97
761	2	1	0	1	1	2	1	1	2	0	3	4.38794	4	6.78
762	1	1	0	1	1	2	1	1	1	0	2	1.81791	3	3.9
763	3	2	0	1	1	2	1	1	3	0	2	-3.51617	1	4.74
764	1	2	0	1	1	2	1	1	1	0	1	-3.31194	1	4.67
765	3	2	0	1	1	2	1	1	2	0	1	4.65574	5	6.99
766	3	1	1	3	1	2	1	1	1	0	1	3.55455	4	7.23
767	1	1	0	3	1	2	1	1	1	0	1	4.91515	5	4
768	3	2	0	2	1	2	1	1	3	0	2	-3.55552	1	3.9
769	3	1	0	1	1	2	1	3	2	0	1	4.51441	4	4
770	3	1	0	2	1	2	1	1	1	0	1	4.88886	5	4
771	3	2	0	2	1	3	1	1	1	0	1	1.89598	3	5.66
772	3	2	0	2	1	3	1	1	1	0	1	1.17834	3	5.49
773	3	2	0	3	1	2	1	1	2	0	1	7.29875	5	5.43
774	2	2	0	2	1	2	1	1	2	0	3	6.7418	5	4.31
775	1	2	0	1	2	2	1	1	1	0	1	3.16516	4	5.4
776	1	1	0	1	2	2	1	1	1	0	1	5.22273	5	4.7
777	1	2	0	3	1	2	1	3	3	0	1	-1.62007	2	5.66
778	2	2	1	2	1	2	1	1	2	1	1	-4.19209	1	8.03
779	1	1	0	2	1	3	2	3	1	0	2	2.0481	3	4.34
780	3	2	1	2	1	2	1	1	2	0	1	7.18263	5	5.7
781	2	1	0	1	2	2	1	1	1	0	1	2.12327	3	4
782	1	1	0	1	1	2	1	3	1	0	3	5.0402	5	4.39
783	2	1	0	1	1	2	1	1	3	0	1	2.13211	3	4
784	1	1	0	2	1	2	1	1	1	0	1	1.25606	3	4.24
785	3	1	0	1	1	2	2	3	2	0	2	3.96492	4	5.36
786	3	1	0	3	1	2	1	1	1	0	1	-8.07479	1	4
787	1	2	0	2	1	2	1	1	2	0	1	5.32534	5	5.73
788	3	1	0	2	1	2	1	1	1	0	1	3.815	4	4.4
789	1	2	0	2	1	2	1	1	2	0	1	6.19956	5	6.5
790	1	1	0	2	1	2	1	1	1	0	1	5.27409	5	4
791	1	2	0	1	1	2	1	1	2	0	1	5.70675	5	4.57
792	3	1	1	2	1	2	1	1	1	0	1	6.80755	5	4
793	3	2	0	1	2	3	1	1	3	0	1	2.06352	3	4
794	1	1	0	3	1	2	1	1	4	0	1	1.52582	3	5.81
795	2	1	0	1	1	2	2	3	2	0	2	4.32503	4	5.62
796	3	2	0	2	1	2	1	1	1	0	1	-4.80214	1	4.52
797	1	1	0	3	1	2	1	1	2	1	1	6.75041	5	4
798	2	1	0	1	2	2	1	1	1	0	1	1.55741	3	4
799	2	2	0	1	1	2	2	1	2	0	1	5.72838	5	5.62
800	1	1	0	2	1	2	1	3	1	0	1	1.51182	3	5.55
801	3	2	0	2	1	2	1	1	1	0	1	5.00256	5	6.27
802	2	1	0	1	1	2	2	3	2	0	3	4.75398	5	4
803	3	2	0	1	2	2	1	1	1	0	1	1.9994	3	6.61
804	1	1	0	2	1	2	1	3	3	0	1	2.82753	4	4
805	2	2	0	3	1	2	1	3	3	1	1	-4.08124	1	4.5
806	3	1	0	2	1	2	1	1	3	1	1	4.55323	5	4
807	2	1	0	1	1	1	1	3	1	0	1	2.26843	3	4
808	3	1	0	3	1	2	1	1	3	0	1	2.22045	3	4
809	2	1	0	1	1	2	2	3	1	0	2	-1.00041	2	6.03
810	1	1	0	2	1	3	1	1	1	0	1	5.97659	5	4
811	2	1	0	2	2	2	1	1	1	0	2	-0.772712	2	6.03
812	2	1	0	1	1	2	1	1	1	0	1	-0.662421	2	5.59
813	2	1	0	1	1	2	2	3	1	0	2	1.62356	3	3.9
814	2	1	0	1	2	2	1	1	1	0	1	-1.62373	2	4
815	3	1	0	2	1	2	1	1	1	0	1	-4.37301	1	4
816	2	1	0	2	1	2	2	2	3	0	2	-0.928036	2	3.9
817	2	2	0	2	1	3	1	1	1	0	2	-2.37376	2	5.06
818	1	1	0	1	2	2	1	1	1	0	2	-1.48881	2	6
819	1	1	1	2	2	2	2	2	1	0	2	5.83575	5	8.03
820	3	1	0	2	2	2	1	1	1	0	1	7.53233	5	4
821	2	1	0	2	2	3	2	3	1	0	2	2.62242	4	4.86
822	2	2	0	2	1	3	1	1	1	0	1	4.39457	4	4.69
823	3	1	0	2	1	2	1	3	3	0	1	5.76549	5	3.96
824	1	2	0	2	1	2	1	1	3	0	1	7.28466	5	4.24
825	1	1	0	1	1	2	2	1	2	0	1	-2.2189	2	5.47
826	1	1	0	2	1	2	1	3	1	0	3	1.05619	3	5.71
827	1	1	0	1	2	2	1	1	1	0	2	-3.98641	1	3.9
828	1	2	0	2	1	3	1	1	1	0	1	6.45199	5	5.5
829	2	1	0	2	2	2	1	1	2	0	2	-2.05595	2	5.23
830	3	2	0	2	1	2	1	1	2	0	1	-3.65705	1	4.81
831	3	1	0	1	2	2	1	1	1	0	2	1.56583	3	6.1
832	3	2	0	2	2	2	1	1	2	0	1	2.7169	4	6.38
833	2	1	0	1	1	2	1	1	1	0	1	-1.50973	2	4
834	3	2	0	2	1	2	1	1	1	0	1	6.02794	5	6.2
835	1	2	0	1	2	2	1	1	1	0	1	2.04913	3	4.65
836	3	2	0	2	1	3	1	1	1	0	1	6.42233	5	5.94
837	2	2	0	2	1	2	1	1	1	0	1	4.78827	5	6.57
838	2	1	0	2	1	2	1	1	3	0	1	2.74352	4	4
839	1	2	0	2	1	2	1	1	1	0	1	5.99835	5	4.1
840	3	1	0	1	1	2	1	1	1	0	2	1.96772	3	6.37
841	2	1	0	2	1	3	1	1	3	1	1	6.63474	5	4
842	1	1	0	2	1	2	1	1	3	0	1	6.03531	5	4
843	2	2	0	1	2	2	1	1	2	0	1	6.5297	5	4
844	2	1	0	1	1	2	2	3	1	0	1	2.00116	3	4.74
845	3	2	0	1	1	2	1	1	1	0	1	-3.52385	1	4.49
846	1	2	0	1	1	2	1	1	2	0	1	-1.89462	2	4
847	1	1	0	2	1	2	3	1	1	0	3	3.08671	4	5.6
848	3	1	0	2	1	2	3	1	1	0	3	3.08671	4	5.6
849	1	1	0	1	1	2	2	3	1	0	1	6.16545	5	4
850	1	2	0	2	1	2	1	1	1	0	2	-7.50179	1	5.1
851	3	2	1	1	1	2	1	1	1	0	1	6.08467	5	7
852	2	1	0	1	2	3	1	1	3	0	2	-5.62672	1	5.6
853	3	1	0	1	1	2	1	1	1	0	3	-4.72941	1	6.84
854	3	1	0	2	1	2	1	1	2	0	2	-8.01882	1	5.83
855	2	1	0	1	1	2	1	1	1	0	1	-4.80136	1	4
856	3	2	0	1	1	3	1	1	1	0	1	4.34008	4	6
857	3	2	0	2	1	2	1	1	2	0	1	5.54041	5	5.36
858	3	1	0	2	1	2	2	1	2	0	2	5.46357	5	4.33
859	3	1	0	2	1	3	1	1	1	0	2	4.67069	5	3.9
860	1	1	0	1	1	2	2	3	2	0	2	7.03935	5	4.5
861	1	1	0	1	1	2	1	3	2	0	3	5.04988	5	4
862	1	2	1	2	1	2	1	1	2	0	1	-3.40805	5	12.3
863	2	1	0	1	1	2	1	1	2	0	1	-0.952981	2	4
864	2	1	0	1	2	2	1	1	1	0	1	-5.06612	1	4
865	3	2	0	2	2	2	1	1	2	0	1	5.56416	5	4
866	1	1	0	1	2	2	2	1	2	0	2	5.2204	5	5.36
867	1	1	0	1	1	3	2	3	1	0	2	3.38486	4	4.65
868	3	2	0	2	2	2	1	1	2	0	1	1.40716	3	5.2
869	2	1	0	1	2	3	2	3	1	0	2	4.8458	5	3.9
870	1	1	0	1	1	2	2	1	1	0	1	5.02257	5	6.11
871	1	1	0	1	2	2	1	3	1	0	1	-6.31657	1	4
872	1	1	0	2	1	2	1	1	1	0	1	-3.99825	1	4
873	3	1	0	2	1	2	1	3	2	1	1	-3.3885	1	5.7
874	2	1	0	3	1	2	1	3	3	0	1	-3.75745	1	4
875	1	2	0	2	1	2	1	2	3	0	1	-2.23426	2	5.01
876	2	1	0	3	1	2	2	1	2	1	1	-4.02321	1	5.35
877	2	1	0	3	1	3	2	2	1	0	1	3.38237	4	4.08
878	1	1	0	3	1	2	2	3	2	0	1	-2.11818	2	4
879	1	1	0	3	1	2	1	1	2	0	1	6.80862	5	5.57
880	3	2	0	2	1	2	1	1	3	0	1	-3.49692	1	5.9
881	1	1	0	2	2	2	1	3	1	0	1	-4.57813	1	4
882	1	2	0	3	2	2	0	1	3	0	1	6.00472	5	5.48
883	3	1	1	2	1	3	2	1	3	0	2	8.37123	5	10.6
884	2	1	0	1	2	2	2	3	2	0	2	5.63544	5	4.03
885	2	1	0	1	1	2	2	3	1	0	2	1.58533	3	3.9
886	2	1	0	1	1	3	2	3	1	0	2	6.67449	5	6
887	2	1	0	1	1	2	1	3	2	0	1	7.02324	5	4
888	3	1	0	3	1	2	1	1	1	0	1	-4.11852	1	4
889	3	2	0	2	1	2	1	1	2	1	1	-3.35114	1	4.3
890	1	2	0	3	1	2	1	1	3	0	1	-0.496658	2	4.31
891	1	1	0	2	1	2	2	1	2	0	3	6.41295	5	5.2
892	1	2	0	2	1	2	1	3	2	0	1	0.0435518	2	5.3
893	2	1	0	1	1	2	2	1	3	0	3	6.52613	5	5
894	1	1	0	2	1	2	1	1	2	0	1	-1.25733	2	4
895	2	2	0	2	2	2	1	1	1	0	1	3.7113	4	4.42
896	1	1	0	1	1	2	2	3	2	0	3	5.74604	5	4
897	1	2	0	2	1	2	1	1	2	0	1	7.63321	5	4.89
898	1	1	0	3	1	3	1	1	3	1	1	3.78598	4	4
899	2	1	0	2	1	2	1	3	2	0	1	7.1049	5	4
900	2	2	0	2	1	3	1	1	1	0	1	3.7781	4	6.68
901	1	2	0	2	1	2	1	3	2	0	1	6.80658	5	4
902	1	2	0	2	1	2	1	2	3	0	1	-2.76665	2	5.52
903	2	1	0	1	2	3	1	1	1	0	1	-2.94703	2	4
904	3	1	0	1	2	2	1	3	1	0	1	-3.53193	1	3.94
905	2	1	0	1	1	2	1	1	2	0	1	-5.62988	1	4
906	3	1	0	2	2	2	3	1	3	0	1	-3.67009	1	6.12
907	1	1	0	2	2	2	1	1	2	0	1	-7.36168	1	4
908	3	2	1	2	1	2	1	1	3	1	1	-5.25478	1	7.32
909	1	2	0	2	1	3	1	1	1	0	1	1.67919	3	3.97
910	1	1	0	1	1	2	1	1	2	0	2	5.68503	5	3.9
911	1	1	0	1	1	2	0	1	1	0	2	5.68503	5	3.9
912	3	1	0	1	1	2	1	1	2	0	1	6.20861	5	4
913	3	1	0	1	1	2	1	1	2	0	3	6.09973	5	4
914	3	2	0	1	1	2	1	1	1	0	1	-2.59701	2	5.15
915	2	2	0	2	1	2	1	1	3	0	1	-8.35888	1	5.1
916	1	1	0	1	1	2	1	1	1	0	1	4.28389	4	4
917	1	1	1	3	1	2	1	1	3	1	1	0.00690184	2	4
918	3	2	0	3	1	2	1	1	3	0	1	2.07375	3	4.73
919	3	2	0	3	1	2	1	1	3	1	1	2.07375	3	4.73
920	3	1	0	2	1	3	2	1	1	0	2	2.40547	3	5.42
921	3	2	0	3	2	2	1	1	1	0	1	4.7329	5	5.1
922	1	2	0	2	1	2	1	1	2	0	1	3.04738	4	5.18
923	2	2	0	1	1	2	1	1	2	0	1	-5.4274	1	5.61
924	1	1	0	2	1	3	2	3	1	0	2	0.176937	3	4.9
925	3	2	0	1	1	3	1	1	1	0	1	4.8527	5	4.41
926	2	1	0	2	1	2	1	1	2	0	1	2.7607	4	5.96
927	3	2	0	1	1	3	1	1	2	0	1	5.57516	5	5.2
928	3	2	0	2	3	3	1	1	3	0	1	-3.02449	1	5.27
929	3	1	0	1	2	2	1	1	1	0	1	-3.98986	1	4
930	1	1	0	1	2	2	1	1	2	0	1	4.12047	4	4
931	2	1	0	1	1	2	2	3	1	0	2	4.04795	4	5.75
932	2	1	0	2	1	2	1	1	3	0	1	1.99155	3	4
933	3	2	0	2	1	2	1	1	1	1	1	2.66643	4	4.25
934	2	1	0	2		3	0	1	1	0	2	-4.77307	1	5.5
935	3	1	0	2	1	2	1	1	2	1	1	4.45211	4	4
936	3	1	0	2	1	2	1	3	3	0	2	-2.45812	2	4.6
937	2	1	0	2	1	2	2	3	2	0	2	6.30008	5	4.76
938	3	2	0	1	1	2	1	1	3	0	1	-8.41365	1	4.79
939	3	2	0	2	1	3	1	1	3	0	1	-6.42926	1	4
940	3	2	1	1	1	2	2	3	2	0	1	6.50061	5	8.49
941	2	2	0	2	2	2	1	1	2	0	1	6.72499	5	4
942	2	2	0	2	2	2	1	1	2	0	1	6.72499	5	4
943	1	1	0	2	2	2	1	3	2	0	3	6.0817	5	5.13
944	3	1	0	2	1	2	1	1	2	0	1	2.0498	3	5.19
945	1	1	0	2	1	3	1	3	1	0	1	7.08536	5	5.26
946	3	1	0	2	1	2	1	1	1	0	1	3.32875	4	5.2
947	2	1	0	2	1	2	1	1	2	0	2	2.71269	4	5
948	1	1	0	1	1	3	1	3	2	0	1	5.45747	5	6.58
949	1	2	0	1	1	3	1	1	2	0	1	6.02457	5	5.25
950	1	1	0	1	2	3	1	1	2	0	2	-8.81089	1	5.3
951	2	1	0	2	1	3	1	1	1	0	1	5.86068	5	4
952	3	2	0	3	1	3	1	1	3	0	1	1.78122	3	6.2
953	3	2	0	2	1	2	1	1	3	0	1	4.26376	4	5.62
954	3	2	0	2	1	2	1	1	1	0	1	0.936697	3	4
955	3	2	0	2	1	2	1	1	1	0	1	-0.734156	2	4
956	1	2	0	1	1	2	1	1	1	0	1	6.23206	5	4
957	1	2	0	1	2	2	1	1	2	0	1	4.34489	4	4
958	1	1	0	2	1	2	2	3	2	0	1	4.34002	4	5.42
959	2	1	0	1	2	2	1	1	2	0	2	4.40985	4	5.18
960	3	2	0	2	1	2	1	1	1	0	1	-0.777963	2	6.53
961	1	1	0	1	1	2	2	3	1	0	1	3.35404	4	6.15
962	3	1	0	1	2	2	1	3	1	0	2	5.99573	5	5.17
963	3	1	0	2	1	2	1	1	3	1	1	0.69385	3	4
964	2	2	0	3	1	2	1	1	3	1	1	2.82988	4	4.68
965	2	2	0	1	2	1	1	1	2	0	1	3.50045	4	5.26
966	2	1	0	2	2	2	1	1	1	0	2	2.52571	4	4.17
967	2	2	0	2	1	2	1	1	3	1	1	-7.77524	1	4.48
968	2	1	0	1	2	2	1	1	1	0	2	-0.652282	2	5.82
969	3	2	0	2	1	2	1	1	1	0	1	2.04072	3	5.5
970	3	2	0	1	1	2	1	1	1	0	1	6.1331	5	5.37
971	1	1	0	1	1	1	1	1	1	0	1	4.64803	5	4
972	3	1	0	1	1	2	2	1	2	0	1	2.712	4	4
973	3	1	0	1	1	2	2	3	1	0	1	5.41795	5	5.83
974	2	2	1	1	1	2	1	1	3	0	1	7.46088	5	4
975	2	1	0	1	1	2	1	3	2	0	2	4.60775	5	3.9
976	3	2	0	2	1	2	1	1	2	0	1	6.56079	5	6.85
977	2	1	0	2	1	2	1	1	1	0	1	2.09676	3	4
978	1	1	0	1	1	2	1	3	2	0	2	-8.43174	1	3.9
979	1	1	0	2	2	2	1	1	1	0	2	-8.43174	1	3.9
980	2	1	0	1	1	2	1	1	3	0	1	-7.35085	1	4
981	2	1	0	1	1	2	1	3	3	0	1	2.38762	3	4
982	3	1	0	1	1	2	1	3	2	0	2	3.69219	4	5.61
983	1	2	0	2	2	2	1	1	2	0	1	3.9961	4	5
984	2	1	0	1	1	2	1	3	1	0	1	3.05363	4	5.76
985	1	1	0	2	2	3	1	3	1	0	2	-2.01754	2	3.9
986	3	1	0	2	2	2	1	1	3	0	1	-3.48892	1	4
987	2	2	0	1	1	2	1	1	3	0	1	-8.22108	1	5.21
988	2	2	0	2	1	2	1	1	1	0	2	6.61547	5	5
989	2	1	0	2	1	2	1	1	2	0	1	7.17913	5	4
990	3	1	1	2	1	2	1	1	3	1	1	0.256823	3	4
991	3	2	1	2	1	2	1	1	2	1	1	5.32074	5	7.83
992	3	1	0	1	2	2	1	3	1	0	2	-0.899203	2	3.9
993	3	1	1	3	1	3	2	1	4	1	1	4.42443	4	4
994	1	2	0	2	2	2	1	1	2	0	1	1.42655	3	4
995	2	1	0	2	1	2	1	1	1	0	2	2.19271	3	5.6
996	3	1	0	2	1	3	1	1	3	1	2	4.86306	5	5
997	1	1	0	1	1	2	1	1	2	0	1	4.60338	5	4.61
998	1	1	0	1	1	2	1	1	1	0	2	4.60338	5	4.61
999	1	1	0	1	2	2	1	3	3	0	2	2.64291	4	3.9
1000	3	1	0	1	1	2	1	1	1	0	1	4.04773	4	4
1001	3	1	0	1	1	2	1	1	3	1	1	-3.04108	1	4
1002	3	1	0	1	1	3	1	1	1	0	1	5.28073	5	4
1003	2	2	0	3	1	2	1	1	2	0	1	5.21311	5	5.13
1004	2	2	0	2	1	2	1	1	3	0	1	4.93681	5	6.56
1005	3	2	0	1	2	2	1	1	2	0	1	4.32889	4	6.2
1006	3	1	1	3	1	2	1	1	3	0	1	5.59045	5	5.4
1007	2	2	0	3	1	2	1	1	3	0	1	6.58887	5	4.81
1008	3	1	0	1	2	2	1	1	3	0	1	-0.990441	2	4.62
1009	3	1	0	2	1	2	1	1	1	0	1	5.33582	5	4
1010	1	2	0	2	1	2	1	1	3	0	1	7.25615	5	4.58
1011	1	1	0	2	1	2	2	3	1	0	2	0.0511925	3	5.16
1012	1	2	0	2	1	1	1	1	2	1	1	6.40248	5	5.2
1013	2	1	0	1	2	3	1	1	2	0	1	4.81356	5	4
1014	3	2	0	2	2	2	1	1	3	1	1	4.50844	4	5.5
1015	3	1	0	2	1	2	1	1	1	0	1	-7.18886	1	4
1016	2	1	0	1	1	2	1	1	1	0	1	-7.28918	1	4
1017	2	1	0	1	2	3	1	1	3	0	1	-5.27661	1	4
1018	2	1	0	2	1	2	2	3	3	0	1	-6.23623	1	6.37
1019	2	1	0	2	1	2	1	1	1	0	2	-4.33149	1	3.9
1020	1	1	0	2	1	2	1	1	3	0	1	0.605316	3	4
1021	3	2	0	1	1	2	1	1	1	1	1	1.78465	3	4.8
1022	2	1	0	1	1	2	1	1	2	0	1	2.76531	4	4
1023	1	1	0	2	1	2	2	3	2	0	1	5.93098	5	5.59
1024	1	2	0	3	1	2	1	1	2	0	1	7.72235	5	3.96
1025	2	1	0	2	2	2	2	3	2	0	1	-6.58265	1	5.6
1026	3	2	1	1	1	2	1	1	3	0	1	-1.22144	2	7.05
1027	2	1	1	1	1	2	1	1	3	0	1	0.952766	3	6.3
1028	3	1	0	1	1	2	1	1	1	0	1	3.41162	4	4
1029	3	2	0	1	1	1	1	1	2	1	1	6.39431	5	3.9
1030	2	1	0	2	2	2	1	1	3	0	1	5.23014	5	4
1031	3	2	0	1	2	2	1	1	1	0	1	1.25368	3	5.38
1032	3	1	0	2	2	2	1	3	3	0	1	-2.53524	2	5.97
1033	2	1	0	1	2	2	1	1	3	0	2	7.01398	5	5.54
1034	3	1	0	2	1	2	1	1	1	0	1	5.99569	5	4.15
1035	2	1	0	1	1	2	2	3	2	0	1	6.72522	5	4.69
1036	2	1	0	1	1	2	2	1	2	0	1	4.18575	4	4
1037	3	1	1	2	1	2	1	1	3	0	1	5.88591	5	4
1038	2	1	0	3	1	2	1	1	3	1	1	5.87106	5	4
1039	1	2	0	1	3	2	1	1	2	0	1	2.24102	3	5.61
1040	2	1	0	1	1	2	1	2	1	0	1	1.57586	3	4
1041	1	1	0	2	2	2	1	3	3	0	1	-2.03679	2	4.61
1042	3	1	0	1	2	2	1	1	2	0	2	-7.60508	1	5.02
1043	3	2	0	2	1	2	1	1	3	0	1	1.24771	3	4
1044	3	2	0	1	1	2	1	1	3	0	1	4.86682	5	4.49
1045	1	1	0	1	1	2	2	1	1	0	2	1.94652	3	5.6
1046	2	2	0	2	2	2	1	1	1	0	1	4.10651	4	5.43
1047	2	1	0	2	1	2	1	3	1	0	1	-7.26713	1	3.9
1048	1	2	0	1	1	1	1	1	4	0	1	4.01554	4	4
1049	2	2	0	3	1	2	1	1	1	0	1	7.08134	5	4.06
1050	3	1	0	2	1	2	1	3	1	0	1	-8.60403	1	5.06
1051	1	1	0	2	1	2	1	1	1	0	2	7.1209	5	5.5
1052	2	2	0	2	1	2	1	1	2	1	1	6.55809	5	6
1053	3	2	0	2	1	2	1	1	2	0	1	4.66198	5	5
1054	3	2	0	2	2	2	1	3	1	0	1	6.77512	5	5.77
1055	2	1	0	1	2	2	2	3	3	0	1	-4.5136	1	4
1056	3	2	0	2	1	2	1	1	2	0	1	-7.77758	1	5.6
1057	1	2	0	3	1	1	1	1	4	0	1	6.04275	5	4
1058	2	2	0	1	1	3	1	1	3	0	2	-5.68059	1	5.6
1059	3	1	0	3	1	2	2	3	3	0	1	-0.164247	2	5.79
1060	3	1	0	3	1	2	1	1	2	0	1	5.9811	5	4
1061	3	2	0	1	1	1	1	1	3	1	1	-1.37496	2	5.2
1062	2	1	0	1	2	2	2	3	1	0	2	2.79769	4	3.9
1063	3	1	0	1	2	2	1	1	3	0	1	2.74462	4	4
1064	3	1	0	1	2	3	1	3	2	0	1	-6.39521	1	5.15
1065	2	1	0	2	2	2	1	3	1	0	2	0.506831	3	3.9
1066	3	1	1	2	2	2	1	2	3	0	1	7.03183	5	15
1067	2	1	0	3	1	2	1	1	3	0	1	-3.58509	1	5.55
1068	3	1	0	1	1	2	2	1	1	0	2	1.70528	3	5.44
1069	3	2	0	2	2	2	1	1	1	1	1	2.74855	4	4.35
1070	1	2	0	1	1	2	1	1	2	0	1	6.05296	5	5.27
1071	3	1	0	1	2	2	1	3	3	0	1	3.02889	4	5.2
1072	1	2	0	1	2	1	1	1	1	0	1	3.9975	4	5.56
1073	2	1	0	1	2	2	2	1	1	0	2	-0.451019	2	5.88
1074	2	2	0	1	1	2	1	1	3	0	2	-4.00894	1	4.23
1075	3	2	0	2	1	2	1	1	4	0	1	-2.49355	2	4.47
1076	3	2	0	3	1	1	1	1	3	0	1	7.26333	5	6.2
1077	1	1	0	1	1	2	1	1	2	0	1	-7.52229	1	4.05
1078	2	1	0	1	2	2	1	1	2	0	1	6.80314	5	4
1079	3	1	0	1	1	2	1	1	1	0	1	5.62229	5	3.9
1080	3	2	0	1	1	2	1	1	1	0	1	1.39884	3	4.97
1081	3	1	0	2	2	2	1	3	2	0	1	-2.43726	2	5.76
1082	1	1	0	2	1	2	2	3	1	0	2	6.77976	5	5.45
1083	1	1	0	1	1	1	1	3	2	0	2	4.19303	4	4.81
1084	3	2	0	1	1	2	1	1	1	0	1	-1.04192	2	4.1
1085	2	1	0	2	2	2	2	3	3	0	1	5.92772	5	4.94
1086	2	2	0	3	1	2	1	1	2	0	1	7.09812	5	6.75
1087	2	1	0	2	1	2	1	1	3	0	1	-4.97437	1	5.26
1088	3	2	0	3	1	2	1	1	2	0	1	-2.54243	2	4.85
1089	1	1	0	3	1	1	1	1	2	0	1	4.68284	5	4.21
1090	3	1	0	2	1	2	1	1	1	0	2	0.480881	3	3.9
1091	3	2	0	2	1	2	1	1	2	0	2	5.25552	5	4.22
1092	1	1	0	3	1	2	1	1	3	0	1	-4.5793	1	4
1093	2	1	1	1	1	2	1	1	1	0	2	-0.675394	2	7
1094	1	1	0	2	1	2	1	1	2	0	2	4.82733	5	6.03
1095	3	2	0	2	1	2	1	1	1	0	1	2.24129	3	4
1096	1	1	0	2	1	2	1	1	2	0	1	2.92571	4	4
1097	1	2	0	2	1	2	1	1	2	0	2	6.92754	5	4.04
1098	3	1	1	3	1	2	1	1	3	0	1	5.94021	5	4
1099	3	1	0	2	1	2	1	1	1	0	2	5.94021	5	3.9
1100	2	1	0	2	1	2	1	1	2	0	2	6.23067	5	3.9
1101	2	1	0	2	1	2	1	1	2	0	2	5.23804	5	3.9
1102	3	2	0	2	1	2	1	1	2	0	1	6.26577	5	4
1103	3	1	0	2	2	3	1	1	2	0	2	5.25015	5	3.9
1104	2	1	0	2	1	3	1	3	1	0	1	6.92029	5	4
1105	2	1	0	1	1	2	1	3	1	0	2	0.859647	3	4.85
1106	1	1	0	1	1	2	1	1	1	0	1	7.23339	5	4
1107	2	1	0	1	2	2	2	3	2	0	1	-7.67499	1	4.43
1108	1	1	0	1	1	2	1	1	2	0	1	-4.56152	1	4
1109	1	1	0	2	1	2	1	1	1	0	1	4.16572	4	4
1110	1	1	0	2	1	2	1	1	3	0	2	6.70705	5	5.98
1111	3	1	0	2	1	2	1	3	2	0	1	-4.30653	1	4.53
1112	2	2	0	1	1	2	1	1	4	0	1	2.84047	4	5.03
1113	1	2	0	2	1	2	1	1	3	0	1	4.92964	5	5.2
1114	3	1	0	1	1	2	1	1	1	0	2	6.56822	5	3.9
1115	1	1	0	1	1	2	2	1	2	0	2	3.25713	4	3.9
1116	3	1	0	1	2	2	1	1	1	0	2	-0.104568	2	3.9
1117	3	2	0	1	2	3	1	1	2	0	2	5.47179	5	4.42
1118	2	1	0	2	1	2	0	1	1	0	2	-7.80921	1	4.9
1119	3	1	0	2	1	2	2	1	3	0	2	-7.80921	1	4.9
1120	3	2	0	2	1	2	1	1	2	0	2	-1.38307	2	4.1
1121	3	2	0	1	1	2	1	1	3	0	1	7.10642	5	4
1122	1	1	0	1	1	2	2	3	3	0	3	-2.34423	2	4
1123	1	1	0	2	1	2	1	1	2	0	1	7.02471	5	4
1124	3	1	0	2	2	2	0	1	1	0	2	4.39989	4	5.64
1125	2	1	0	2	2	2	2	3	3	0	2	4.39989	4	5.64
1126	2	1	0	2	1	2	2	3	1	0	3	-3.12839	1	5.42
1127	1	1	0	2	1	2	1	1	3	0	1	-0.572246	2	4
1128	2	1	0	2	2	2	1	3	1	0	2	4.67819	5	3.9
1129	3	1	0	1	1	2	0	1	1	0	2	6.20856	5	3.9
1130	1	1	0	1	1	2	0	1	1	0	2	6.20856	5	3.9
1131	1	1	0	1	1	2	0	1	1	0	2	6.20856	5	3.9
1132	1	1	0	1	1	2	2	3	2	0	2	6.20856	5	3.9
1133	1	1	0	2	1	2	1	3	2	0	2	3.44339	4	3.9
1134	2	1	0	2	1	2	2	3	2	0	2	6.75244	5	3.9
1135	2	1	0	2	1	2	2	3	2	0	2	5.27869	5	6.37
1136	1	1	0	1	1	2	2	3	1	0	2	-4.71314	1	4.94
1137	3	1	0	1	1	2	1	1	1	0	1	7.36762	5	4
1138	2	1	0	2	1	3	1	2	3	0	1	6.14198	5	4
1139	1	1	0	2	2	3	1	1	1	0	1	-0.719006	2	4
1140	3	1	0	1	1	2	1	1	1	0	2	-0.164104	2	6.1
1141	1	2	0	1	2	2	1	1	1	0	2	5.1532	5	6.61
1142	1	1	0	3	1	2	0	1	3	0	3	2.4945	4	4.28
1143	3	2	0	2	2	2	1	1	1	0	1	6.04084	5	4.95
1144	3	2	1	3	1	2	1	1	3	0	1	-3.26664	5	17.5
1145	3	1	0	1	2	2	2	1	2	0	2	7.38253	5	3.9
1146	3	1	0	2	1	2	1	1	3	0	1	-6.91933	1	4
1147	1	2	0	1	2	2	1	1	3	0	1	7.43777	5	4
1148	3	2	0	2	2	2	1	1	1	0	1	7.01093	5	4.01
1149	3	2	0	1	2	2	1	1	1	0	1	6.89842	5	5.36
1150	2	2	0	1	2	2	1	1	1	0	1	6.06297	5	5
1151	1	1	0	1	1	2	2	3	2	0	3	-2.6807	2	5.7
1152	1	2	0	1	2	2	1	1	2	0	2	-4.08401	1	5.6
1153	1	2	0	1	1	1	1	1	3	0	1	3.60952	4	4.47
1154	1	1	0	2	2	1	1	3	1	0	2	2.58379	4	3.9
1155	2	1	0	1	2	2	2	3	2	0	2	5.38459	5	3.9
1156	2	2	0	2	1	2	1	1	3	0	3	2.84754	4	4.78
1157	3	2	0	1	1	2	1	1	1	0	1	6.72257	5	4.74
1158	1	1	0	2	1	2	1	1	3	0	3	0.33437	3	4
1159	3	1	0	1	1	2	1	3	1	0	2	-2.21598	2	6.06
1160	3	1	0	2		3	0	1	1	0	2	4.84653	5	3.9
1161	1	1	0	1	2	2	2	3	2	0	2	-4.83911	1	4.34
1162	2	1	0	2	1	2	2	3	1	0	2	3.7308	4	5.2
1163	3	2	0	2	1	2	1	1	1	0	2	2.90187	4	5.3
1164	3	1	0	1	1	2	1	3	3	0	2	4.49253	4	3.9
1165	2	1	0	1	1	2	2	3	1	0	2	6.82559	5	5.83
1166	3	1	0	2	1	2	1	1	1	0	2	0.655446	3	4
1167	3	1	0	2	1	1	1	1	3	0	2	5.49102	5	5.6
1168	2	1	0	1	2	2	1	1	1	0	2	7.40013	5	3.9
1169	3	1	0	1	1	2	1	1	2	0	3	2.7266	4	4
1170	1	1	0	2	1	2	1	1	3	0	3	-8.16644	1	5.57
1171	3	1	0	1	2	2	1	1	3	0	1	6.56995	5	4
1172	3	1	0	2	1	2	1	3	3	0	2	7.45714	5	4.91
1173	1	2	0	2	1	2	1	3	3	0	2	4.27501	4	4.43
1174	1	2	0	1	2	2	1	1	2	1	1	5.27236	5	6.2
1175	2	1	0	1	1	2	1	1	1	0	2	-0.513263	2	3.9
1176	3	1	0	2	1	2	1	1	2	1	1	7.27397	5	4
1177	2	1	0	2	1	2	2	3	3	0	3	-8.42677	1	4.54
1178	2	2	0	1	1	2	1	1	2	0	2	-1.57106	2	6.19
1179	1	1	0	1	2	2	1	1	3	0	1	5.82709	5	4
1180	3	1	0	1	1	2	2	3	2	0	2	4.24695	4	3.9
1181	1	1	0	2	1	2	2	3	1	0	2	4.64494	5	3.9
1182	2	2	0	1	1	2	1	1	1	0	1	0.617902	3	5.23
1183	2	1	0	1	2	2	2	3	2	0	1	-4.5678	1	5.76
1184	1	1	0	2	1	2	2	3	3	0	3	-1.69716	2	4.49
1185	1	1	0	2	1	3	1	1	2	0	1	7.68918	5	4
1186	2	2	0	2	1	2	1	1	2	0	2	5.89891	5	5.4
1187	2	1	0	2	1	2	1	3	3	0	2	5.72295	5	4.5
1188	2	2	0	2	1	2	1	1	3	0	1	1.92558	3	5.37
1189	2	2	0	1	2	2	1	1	2	0	2	5.20736	5	4.36
1190	1	1	0	2	2	3	2	3	2	0	3	3.53888	4	5.13
1191	3	1	0	1	2	3	2	3	3	0	3	4.38958	4	4.65
1192	1	1	0	1	2	2	2	3	3	0	3	4.60854	5	6.33
1193	1	1	0	2	2	3	1	1	3	0	2	4.18259	4	5.5
1194	3	1	0	1	2	2	2	3	1	0	2	0.29484	3	4.82
1195	3	2	0	2	1	3	1	1	1	0	2	3.77978	4	6.64
1196	2	1	0	2	1	1	1	1	2	0	2	4.41994	4	5.87
1197	2	1	0	1	1	2	1	3	2	0	3	3.97355	4	5.13
1198	2	1	0	2	1	2	1	1	3	0	1	2.02409	3	4
1199	2	2	1	3	2	2	1	3	3	0	1	6.15764	5	18.9
1200	1	1	0	2	1	3	1	1	4	0	1	5.06563	5	4
1201	3	1	0	3	1	2	1	1	4	0	2	3.71488	4	5
1202	1	1	0	3	1	2	1	1	3	0	1	-0.130201	2	4
1203	1	1	0	3	1	2	1	1	3	0	3	3.85417	4	4.29
1204	2	1	0	2	2	2	1	1	3	1	2	-2.91353	2	3.9
1205	3	1	0	2	1	2	1	3	3	1	1	-4.22308	1	4
1206	3	2	0	3	1	2	1	1	4	0	1	7.58487	5	4.84
1207	2	1	0	3	1	2	1	1	4	0	1	-6.67501	1	6.32
1208	2	1	0	2	1	2	1	3	3	0	2	1.71658	3	3.9
1209	3	1	0	2	1	2	1	1	2	0	2	2.05856	3	3.9
1210	1	1	0	1	1	2	2	3	2	0	3	-3.02618	1	4
1211	2	2	0	1	1	2	1	1	2	0	1	1.45495	3	4
1212	1	2	0	1	2	2	1	1	1	0	1	3.99019	4	4.1
1213	1	1	0	1	2	2	1	1	1	0	1	5.82998	5	4
1214	1	1	0	1	2	2	2	1	3	0	2	1.4054	3	5.97
1215	1	1	0	1	1	2	1	3	1	0	1	3.08728	4	5.13
1216	2	1	0	1	2	2	1	1	4	0	2	2.52834	4	3.9
1217	2	2	0	1	2	2	1	1	3	0	1	4.73798	5	4
1218	2	1	0	1	2	2	2	3	2	0	1	2.22163	3	5.39
1219	1	2	0	2	1	2	1	1	2	0	1	3.69631	4	4
1220	2	1	0	1	1	2	1	1	2	0	3	-0.721445	2	5.02
1221	2	1	0	1	1	2	1	1	2	0	2	0.987808	3	3.9
1222	3	1	0	2	1	2	1	1	1	1	1	-3.90433	1	4
1223	3	1	0	2	1	2	1	3	3	0	1	3.43396	4	4
1224	1	1	0	3	1	2	1	1	3	0	1	-2.7129	2	4
1225	3	1	0	2	1	2	1	1	3	0	1	-6.00576	1	4
1226	3	1	0	2	2	2	1	1	3	1	2	-7.61299	1	3.9
1227	3	2	0	1	2	2	1	1	4	0	1	3.37249	4	4
1228	2	1	0	1	1	2	1	1	4	1	2	-0.220689	2	3.9
1229	3	1	0	1	2	2	1	1	3	0	2	4.64833	5	4.95
1230	2	1	0	1	2	1	2	3	2	0	3	2.6529	4	4
1231	2	2	0	1	1	2	1	1	1	0	1	2.3213	3	5.37
1232	3	2	0	1	1	3	1	1	1	0	1	5.58168	5	3.93
1233	2	2	0	2	1	2	1	1	2	0	1	5.73861	5	4
1234	3	2	0	1	1	2	1	1	2	1	2	3.48634	4	4.61
1235	1	2	0	1	1	2	1	1	2	1	2	3.48634	4	4.61
1236	2	1	0	2	1	2	1	1	1	0	1	3.09971	4	4.91
1237	2	1	0	2	1	2	2	3	2	0	2	-0.806851	2	6.06
1238	1	2	0	1	2	2	1	1	1	0	1	2.89484	4	4
1239	2	2	0	2	1	2	1	1	2	0	2	4.75438	5	6.23
1240	2	1	0	1	2	2	1	1	2	0	3	4.2201	4	4.57
1241	2	1	0	1	1	2	2	3	1	0	2	3.96591	4	3.9
1242	1	2	0	3	1	1	1	1	3	1	1	2.43433	3	5.82
1243	3	1	0	2	1	2	1	1	4	0	3	-2.39969	2	4
1244	3	1	0	1		3	1	1	2	0	2	4.3481	4	3.9
1245	2	1	0	1	1	2	1	1	2	0	2	6.23259	5	3.9
1246	1	2	0	1	2	2	1	1	3	0	1	1.94193	3	5
1247	1	1	0	1	2	2	1	1	2	0	3	1.08075	3	6.12
1248	2	1	0	1	1	2	1	1	1	0	2	2.97692	4	3.9
1249	3	1	0	2	1	2	1	3	1	0	1	-2.81534	2	4
1250	2	2	0	2	1	2	1	1	2	0	1	6.57696	5	4
1251	3	1	0	1	1	1	1	1	2	0	3	4.58423	5	6
1252	3	2	0	1	1	2	1	1	3	0	1	-4.06943	1	4
1253	1	2	0	1	1	2	1	1	2	0	1	2.20031	3	4.2
1254	1	1	0	2	2	2	2	3	1	0	2	-3.51563	1	3.9
1255	2	1	0	1	1	2	1	3	4	0	3	1.93145	3	4.1
1256	1	1	0	1	2	2	1	3	3	0	2	4.176	4	5.99
1257	2	1	0	2	1	2	1	1	2	0	2	1.19154	3	4.89
1258	3	2	0	1	1	2	1	1	2	0	1	4.45767	4	4.07
1259	1	2	0	3	1	2	1	1	3	0	1	5.43634	5	6.49
1260	2	1	0	1	1	3	1	1	2	0	2	0.0711307	3	4.08
1261	2	1	0	3	2	2	1	1	4	0	1	5.85512	5	6.61
1262	1	2	0	3	1	2	1	1	3	1	1	7.53688	5	6
1263	2	1	0	1	2	2	2	3	2	0	2	-8.41646	1	3.9
1264	1	2	0	1	2	2	1	1	1	0	1	5.66802	5	4.7
1265	1	2	0	1	2	2	1	1	3	0	1	2.27769	3	6.58
1266	1	1	0	2	1	2	1	1	3	0	1	1.12653	3	4
1267	2	1	0	1	1	2	1	3	1	0	2	6.0741	5	6.46
1268	2	2	0	2	1	2	1	3	1	0	1	3.87021	4	5.45
1269	2	2	0	2	1	2	1	1	2	0	1	5.43498	5	4.4
1270	1	1	0	2	2	2	1	1	3	1	3	3.23577	4	4
1271	3	2	0	2	1	2	1	1	3	0	1	-1.30391	2	3.98
1272	3	2	0	1	1	2	1	1	1	0	1	6.89296	5	4.39
1273	1	1	0	1	1	2	1	1	2	0	2	2.76268	4	3.9
1274	3	1	0	1	1	2	2	3	1	0	2	2.02586	3	3.9
1275	1	2	0	2	1	3	1	1	2	0	1	4.96042	5	5.22
1276	1	2	0	1	1	2	1	1	1	0	2	-6.79434	1	4.63
1277	3	1	0	3	1	2	1	3	1	0	2	6.22167	5	6.05
1278	3	1	0	3	1	2	1	1	3	1	1	5.48704	5	4
1279	3	2	0	2	1	2	1	1	3	1	1	-4.42164	1	5.3
1280	3	2	0	2	1	2	1	1	2	1	1	3.18032	4	4.02
1281	3	2	0	1	1	2	1	1	3	0	2	-5.15876	1	5.8
1282	2	1	0	2	1	2	1	1	3	0	3	-3.22678	1	4
1283	2	2	0	1	2	2	1	1	1	0	1	-2.9978	2	6.01
1284	1	1	1	3	2	2	1	1	2	0	1	5.03648	5	4
1285	2	2	0	1	1	2	1	1	3	0	1	6.82323	5	4
1286	1	1	0	2	1	2	1	1	3	0	1	4.4315	4	4
1287	1	2	0	1	1	2	1	1	2	0	1	4.41398	4	5.17
1288	2	1	0	1	1	2	1	3	1	0	2	5.3204	5	3.9
1289	3	1	0	1	2	2	2	3	3	0	2	5.71573	5	6.1
1290	2	1	0	1	1	2	3	3	1	0	2	5.99328	5	3.9
1291	1	2	1	2	1	2	1	1	1	0	1	5.06903	5	7.08
1292	3	1	0	1	2	2	1	1	2	0	3	-3.61304	1	4
1293	1	2	0	1	1	2	1	1	1	0	1	5.30412	5	3.9
1294	2	1	0	3	1	2	1	3	2	0	2	7.11746	5	3.9
1295	1	2	0	2	1	2	1	1	3	0	3	-7.25462	1	6.05
1296	2	1	0	3	1	3	1	1	3	0	1	6.17433	5	4
1297	3	1	0	3	1	3	1	1	1	0	2	4.42696	4	5.85
1298	3	1	0	2	1	2	1	3	1	0	1	3.22835	4	6.3
1299	3	1	0	1	1	2	1	1	1	0	1	5.23956	5	4
1300	2	1	0	1	2	3	2	3	2	0	2	6.01061	5	3.9
1301	3	2	0	1	1	2	1	1	1	0	1	-4.34889	1	6.7
1302	1	1	0	1	1	2	1	1	1	0	2	-1.43848	2	3.9
1303	2	1	0	1	2	3	1	1	2	0	2	7.30448	5	4.52
1304	3	2	0	3	1	2	1	1	4	0	1	-2.44287	2	4.92
1305	3	2	0	2	1	2	1	1	1	0	1	0.16436	3	4.69
1306	3	2	0	3	1	2	1	1	3	1	1	3.25547	4	5.08
1307	3	1	0	2	1	2	1	3	1	0	2	5.82207	5	4.71
1308	1	1	0	1	1	2	1	1	3	0	1	6.82736	5	4
1309	3	2	0	3	1	2	1	1	3	1	1	-7.44225	1	5.08
1310	2	2	0	3	1	3	1	1	3	0	1	-7.44225	1	5.08
1311	2	1	1	1	1	3	1	1	1	0	2	6.38901	5	7.17
1312	3	2	0	1	2	2	1	1	2	0	1	5.41757	5	5.68
1313	2	1	0	1	2	2	2	3	2	0	1	5.81891	5	4
1314	1	2	1	2	1	2	1	1	1	1	1	5.04135	5	4
1315	3	2	1	2	1	2	1	1	1	1	1	5.04135	5	4
1316	3	1	0	1	1	2	2	1	4	1	2	-1.56892	2	6
1317	1	2	0	1	1	2	1	1	3	0	1	-0.962186	2	6.1
1318	2	2	0	3	1	2	1	1	3	0	1	0.655926	3	5.25
1319	1	1	0	1	2	2	2	3	3	0	2	6.70716	5	5.15
1320	2	1	0	1	1	2	2	3	1	0	2	3.97789	4	3.9
1321	2	2	0	3	1	2	1	1	1	0	1	-0.257149	2	6.2
1322	1	1	0	1	1	2	1	1	1	0	1	4.42019	4	4
1323	1	1	0	1	2	2	2	3	1	0	2	6.37456	5	5.4
1324	1	1	0	2	2	2	1	3	3	0	3	-6.15677	1	4.14
1325	2	2	0	2	1	2	1	1	3	1	1	-1.92687	2	4.55
1326	2	2	0	2	1	3	1	1	2	0	1	3.32232	4	4.42
1327	2	1	0	2	1	2	1	1	2	0	1	3.82776	4	4
1328	3	1	0	1	2	2	2	3	2	0	2	7.07619	5	4.32
1329	2	1	0	1	1	2	1	3	2	0	3	5.06727	5	5.98
1330	2	1	1	1	2	3	1	1	1	0	2	4.55628	5	7.06
1331	3	1	1	1	2	2	1	1	1	0	2	8.27974	5	11.9
1332	3	2	0	1	1	2	1	1	3	0	3	-3.89979	1	4
1333	2	2	0	1	2	2	1	1	1	0	1	-2.4645	2	4
1334	3	1	0	1	1	2	2	1	1	0	2	-2.80482	2	5.2
1335	1	1	0	1	2	2	2	1	2	0	2	-7.35939	1	5.4
1336	1	1	0	1		3	0	1	1	0	2	7.71335	5	3.9
1337	2	2	0	1	2	2	1	1	1	0	1	6.22176	5	4
1338	2	1	1	2	1	3	1	1	3	1	2	-6.7452	1	3.9
1339	3	2	1	2	1	2	1	1	1	0	1	2.34719	5	15.3
1340	3	2	0	2	1	2	1	1	3	1	1	-2.51262	2	5.8
1341	3	1	0	2	1	3	1	3	1	1	3	5.19554	5	4
1342	3	2	0	2	1	2	1	3	2	0	1	6.05773	5	4.35
1343	1	1	0	2	1	2	1	1	1	0	1	3.81544	4	4
1344	3	1	0	3	1	2	1	1	1	1	1	5.06921	5	4
1345	3	1	0	3	1	2	2	3	2	1	2	7.31183	5	6.57
1346	3	2	0	1	1	2	1	1	3	0	1	-6.50957	1	4
1347	2	2	0	2	1	2	1	3	3	0	1	-1.78438	2	4
1348	2	1	0	2	1	2	1	1	3	1	2	1.50817	3	3.9
1349	3	1	0	1	1	2	1	1	1	0	1	3.00669	4	4
1350	1	2	0	2	1	2	1	1	3	0	1	-0.432089	2	4.75
1351	1	1	0	2	1	2	1	1	2	0	1	4.13914	4	6.61
1352	3	1	0	3	1	2	1	1	1	0	1	-2.39288	2	4
1353	3	1	0	2	1	2	1	1	3	1	1	-2.08454	2	4
1354	3	2	0	2	1	2	1	1	1	0	1	5.62307	5	5.36
1355	3	1	0	2	2	2	1	1	1	0	2	6.74525	5	3.9
1356	2	1	0	1	1	2	1	3	1	0	2	-8.10382	1	3.9
1357	1	2	0	1	1	2	1	1	1	0	2	3.39613	4	6
1358	1	1	0	1	2	2	2	3	1	0	1	5.34751	5	4.86
1359	3	1	0	2	1	2	1	3	3	0	3	6.98392	5	5.17
1360	2	2	0	1	1	2	1	1	1	0	1	6.70716	5	4
1361	1	1	0	1	1	2	1	3	2	0	2	5.31171	5	3.9
1362	3	1	0	2	1	2	1	1	1	0	1	-4.04786	1	5
1363	1	2	0	2	1	2	1	1	3	0	1	-3.18439	1	4
1364	1	1	0	2	1	3	2	3	1	0	2	6.14612	5	4.25
1365	1	2	0	1	1	2	1	1	1	0	1	6.6918	5	4.45
1366	1	2	1	2	1	2	1	1	4	0	1	1.89959	3	4
1367	3	1	0	2	1	2	1	3	1	0	2	5.0788	5	3.9
1368	1	2	0	2	1	2	1	1	3	0	1	-4.76388	1	5
1369	1	1	0	3	1	2	1	1	1	0	2	4.10616	4	4.84
1370	2	1	0	1	2	2	2	3	3	0	3	-7.22524	1	6.19
1371	1	1	0	1	1	2	1	1	1	0	2	4.34204	4	4.7
1372	3	1	0	2	1	2	1	1	1	0	3	4.04335	4	4
1373	2	1	0	2	1	2	1	1	2	0	1	5.10472	5	4
1374	1	2	0	1	2	2	1	1	1	0	1	3.42448	4	5.14
1375	1	1	0	1	2	2	1	3	2	0	2	1.98208	3	5.59
1376	1	2	0	1	1	2	1	1	1	0	1	3.91978	4	4.72
1377	2	2	0	1	1	2	1	1	3	0	1	-7.8962	1	6
1378	1	1	0	1	1	3	1	1	1	0	2	2.69946	4	3.9
1379	3	1	0	1	1	2	1	1	1	0	1	6.33223	5	4
1380	1	1	0	2	1	2	1	1	2	0	3	4.08456	4	5.9
1381	1	1	0	1	1	2	2	1	1	0	2	4.89982	5	4.13
1382	2	1	0	2	1	2	1	3	3	0	3	-7.4156	1	4
1383	1	2	0	1	1	2	1	1	1	0	1	2.70427	4	5.61
1384	1	1	0	1	2	3	2	3	1	0	2	-0.677197	2	3.9
1385	2	2	0	1	1	2	1	1	1	0	2	2.51535	4	3.9
1386	1	1	0	1	1	3	2	3	2	0	2	4.06195	4	3.9
1387	2	1	0	1	1	2	2	2	3	0	2	3.0495	4	3.9
1388	3	2	0	2	1	3	1	1	1	0	1	4.75578	5	5.8
1389	3	2	0	1	2	3	1	1	1	0	1	-0.887418	2	5.3
1390	3	2	0	1	2	2	1	1	1	0	1	3.95207	4	5.4
1391	1	2	0	1	2	2	1	1	1	0	1	5.66718	5	5.4
1392	1	1	0	1	1	3	1	1	3	0	2	1.50819	3	5.82
1393	1	2	0	2	1	2	1	1	3	1	1	-7.8498	1	4.6
1394	1	2	0	2	1	2	1	1	3	1	1	-7.4127	1	4.6
1395	1	1	0	1	1	2	1	1	3	0	1	3.62108	4	4
1396	1	1	0	1	1	2	1	1	3	0	1	5.6543	5	4
1397	1	1	0	1	2	3	1	1	3	0	2	3.44111	4	4.88
1398	1	2	0	1	1	2	1	1	1	0	2	2.90748	4	3.9
1399	1	2	0	1	1	2	1	1	1	0	1	0.712337	3	4.23
1400	1	2	0	1	1	2	1	1	1	0	2	5.27464	5	4.82
1401	2	2	0	1	1	2	1	1	1	0	2	7.89837	5	4.82
1402	2	1	0	2	1	2	2	3	1	0	2	4.6929	5	6.2
1403	1	2	0	2	1	2	1	1	3	0	3	-1.76028	2	4
1404	2	2	0	2	1	2	1	1	3	0	3	4.34846	4	4
1405	2	1	0	1	1	2	1	1	1	0	3	4.11014	4	4
1406	3	1	0	1	1	2	1	1	1	0	3	6.1714	5	4
1407	3	1	0	1	1	2	2	1	1	0	2	3.98446	4	3.9
1408	3	1	0	1	2	2	1	1	1	0	1	6.47127	5	6
1409	3	1	0	3	1	2	2	2	1	0	2	1.49004	3	4.16
1410	3	1	0	3	1	2	1	1	1	0	1	3.2168	4	4.16
1411	1	2	0	2	1	2	1	1	1	0	1	4.22174	4	5.3
1412	1	1	0	3	1	2	1	1	3	1	1	1.40957	3	4
1413	3	1	0	3	1	2	1	1	1	0	1	5.61454	5	5
1414	1	1	0	3	1	2	1	1	1	0	2	4.04866	4	3.9
1415	1	1	0	2	1	2	2	3	1	0	2	2.00504	3	3.9
1416	2	2	0	2	1	2	1	3	3	0	2	-0.704848	2	4.67
1417	2	2	0	1	1	2	1	1	2	0	3	-2.88007	2	3.96
1418	2	1	0	1	2	3	1	1	1	0	2	-0.464903	2	5.2
1419	1	1	0	2	1	2	1	3	1	0	1	6.21152	5	4
1420	2	1	0	2	1	2	1	3	1	0	2	3.20103	4	4.64
1421	2	1	0	2	1	2	1	1	1	0	2	2.97338	4	3.96
1422	1	2	0	1	1	2	1	1	3	0	3	5.61157	5	4.72
1423	3	2	0	2	1	2	1	1	1	0	2	-1.15725	2	3.9
1424	3	1	0	1	2	2	1	1	1	0	2	-5.48739	1	4.22
1425	1	1	0	2	1	2	1	1	1	0	2	5.39245	5	3.9
1426	1	1	0	1	1	2	1	1	3	0	3	-5.37657	1	4
1427	1	1	0	1	2	2	1	1	1	0	1	3.55875	4	4
1428	3	1	0	1	1	1	1	3	1	0	1	6.54815	5	4.24
1429	2	1	0	1	2	2	2	1	1	0	2	3.74014	4	3.9
1430	2	1	0	2	1	1	1	3	3	1	2	-0.50715	2	4.63
1431	1	1	0	3	1	2	1	1	1	1	2	2.24698	3	4.5
1432	2	1	0	1	1	2	1	1	1	0	2	3.91113	4	6.3
1433	3	1	0	3	1	2	1	3	3	1	1	-3.73931	1	4
1434	1	2	0	2	1	3	1	1	1	0	1	3.99916	4	4.84
1435	3	1	0	1	2	2	2	1	1	0	2	4.00311	4	3.9
1436	2	1	0	1	1	2	1	3	1	0	2	3.52847	4	3.9
1437	3	2	0	1	1	2	1	1	3	0	3	-3.45893	1	4
1438	2	1	0	2	1	2	1	1	3	0	3	-1.26654	2	4
1439	3	2	0	1	1	2	1	1	1	0	2	1.79845	3	4.94
1440	2	1	0	2	2	2	1	3	3	0	2	3.95038	4	3.9
1441	1	1	0	1	1	2	1	1	4	0	1	-2.89176	2	4.99
1442	2	2	0	2	1	2	1	1	2	0	2	3.08709	4	5.74
1443	2	1	0	1	1	2	2	1	1	0	2	4.51516	4	5.26
1444	1	1	0	2	1	2	2	3	1	0	2	4.44349	4	4.87
1445	3	2	0	2	1	2	1	1	3	0	1	6.65207	5	6.06
1446	3	2	0	2	1	2	1	3	3	0	1	5.45184	5	4.82
1447	3	1	0	2	1	2	1	1	1	0	2	0.270002	3	4.5
1448	2	1	0	2	2	2	2	3	1	0	2	4.86591	5	3.9
1449	1	2	0	2	1	1	1	1	1	0	1	4.87701	5	4.11
1450	1	2	0	2	1	1	1	1	3	1	1	6.39282	5	4
1451	1	1	0	3	1	2	1	1	1	0	2	4.94249	5	3.9
1452	3	1	0	1	2	2	1	1	1	0	1	-0.0029122	2	4
1453	1	1	0	2	2	2	1	1	3	0	1	3.84073	4	4
1454	3	1	0	2	1	2	1	1	1	0	1	5.71021	5	4
1455	3	1	0	2	1	2	1	1	2	1	2	4.66424	5	6
1456	3	2	0	1	1	2	1	1	1	0	1	2.08239	3	5
1457	2	2	0	1	1	2	1	1	1	0	1	5.24365	5	5
1458	1	1	0	1	1	1	1	1	1	0	1	4.09003	4	4
1459	1	2	0	1	1	2	1	1	1	1	1	6.42953	5	5.21
1460	3	1	0	2	1	2	1	1	1	0	2	1.31416	3	3.9
1461	3	1	0	2	1	2	1	1	3	0	3	2.73656	4	5.88
1462	3	2	0	2	1	2	1	1	1	0	1	-5.51478	1	5.59
1463	2	1	0	2	1	3	1	1	1	0	1	4.5453	5	4
1464	2	1	0	2	2	2	1	1	2	1	2	0.499869	3	3.9
1465	3	1	0	2	1	2	2	3	1	0	2	-7.75765	1	3.9
1466	1	2	0	1	1	2	1	1	1	0	1	2.4778	3	4.7
1467	1	2	0	1	1	2	1	1	1	0	1	-2.38601	2	5.7
1468	1	2	0	1	1	2	1	1	3	0	2	-3.98334	1	4.61
1469	2	1	0	1	1	2	1	3	1	0	2	5.05975	5	5.53
1470	1	2	0	2	1	2	1	1	1	0	1	4.0793	4	4
1471	2	1	1	3	1	2	2	3	3	0	2	7.97634	5	3.9
1472	2	1	0	1	2	2	1	1	1	0	2	1.0402	3	4.18
1473	3	1	0	3	1	2	1	1	1	0	2	3.7615	4	3.9
1474	2	1	0	2	1	2	1	3	2	1	2	3.07037	4	3.9
1475	1	1	0	1	1	2	1	1	1	0	1	4.02585	4	5.2
1476	3	1	0	1	1	2	1	1	1	0	2	6.36774	5	3.9
1477	2	1	0	1	1	2	1	3	1	0	2	5.1778	5	3.9
1478	3	1	0	1	1	2	1	3	2	0	2	5.43297	5	4.73
1479	2	1	0	1	1	2	1	1	1	0	2	2.96402	4	4.23
1480	1	2	1	2	1	2	1	1	3	1	1	-1.76497	2	4
1481	3	2	0	1	1	2	1	1	1	0	1	-5.64765	1	5.42
1482	2	1	1	2	2	2	1	3	1	0	3	4.1083	4	8.21
1483	1	2	0	2	1	2	1	1	1	0	1	3.98137	4	4
1484	3	2	0	2	1	2	1	1	1	0	1	-3.14376	1	5.18
1485	2	2	0	2	1	2	1	1	1	0	1	3.91924	4	5
1486	3	1	0	1	1	2	1	1	1	0	1	1.77849	3	4
1487	3	1	0	2	1	2	1	1	1	0	2	6.45607	5	5.59
1488	3	2	0	1	1	2	1	1	3	0	3	-4.69316	1	4.46
1489	1	1	0	2	1	2	2	3	3	0	3	-1.68247	2	6.6
1490	2	2	0	1	1	2	1	1	1	0	1	6.72727	5	4
1491	1	2	0	1	1	2	1	1	1	0	1	0.935024	3	5.54
1492	1	2	0	1	2	2	1	1	1	0	1	4.18188	4	4
1493	1	1	0	1	1	2	1	3	1	0	3	-5.32504	1	4.67
1494	1	2	0	1	1	2	1	1	1	0	1	-0.176487	2	6.72
1495	3	1	0	1	1	2	1	3	1	0	2	-0.002532	2	6.56
1496	2	1	0	1	1	2	1	1	1	0	2	3.53932	4	6.32
1497	3	1	0	1	1	2	1	1	1	0	2	-4.23985	1	6.32
1498	3	1	0	2	2	2	1	3	1	0	2	6.98604	5	4.07
1499	1	1	1	1	1	3	1	3	2	0	2	3.49444	4	9.2
1500	3	2	0	1	1	2	1	1	3	0	1	6.04565	5	5.88
1501	1	2	0	1	1	2	1	1	1	0	1	6.41698	5	4.66
1502	3	1	0	1	1	2	1	1	2	0	1	4.8928	5	4
1503	1	1	0	1	2	2	2	3	3	0	2	1.55494	3	3.9
1504	2	2	0	1	1	2	1	1	1	0	2	4.9287	5	3.9
1505	2	2	0	1	2	3	1	1	1	0	1	4.13182	4	4.89
1506	3	1	0	1	2	3	2	1	1	0	2	5.52468	5	4.58
1507	3	1	0	1	2	3	2	1	1	0	2	5.52468	5	4.58
1508	1	1	0	1	2	3	2	1	1	0	2	5.52468	5	4.58
1509	1	1	0	1	1	2	1	1	3	0	2	-0.41588	2	3.9
1510	2	1	0	2	2	2	1	3	3	0	2	-3.57862	1	5.37
1511	2	2	0	2	1	2	1	1	3	0	2	-4.68098	1	5.69
1512	2	2	0	2	2	2	1	1	1	0	1	6.15007	5	5.25
1513	1	2	0	1	2	2	1	1	1	0	1	2.86123	4	4.86
1514	1	2	0	2	1	2	1	1	1	0	1	6.05365	5	5.24
1515	1	1	0	3	2	2	2	1	2	0	2	4.48724	4	3.9
1516	1	1	0	1	1	2	1	1	3	1	1	-5.39794	1	4
1517	2	2	0	2	1	2	1	1	2	0	1	1.90916	3	4
1518	2	2	0	2	1	2	1	1	1	0	1	4.53855	5	5.23
1519	1	1	0	2	1	2	2	3	1	0	2	3.68185	4	3.9
1520	2	1	0	1	2	2	1	1	3	0	3	-1.40243	2	5.6
1521	3	1	0	1	1	2	1	1	1	0	1	6.67751	5	4
1522	1	2	0	3	1	2	1	1	2	1	1	-3.12807	1	4.18
1523	1	1	1	3	1	2	1	1	1	0	1	1.1643	5	10
1524	2	2	0	3	1	2	1	1	3	0	1	5.68711	5	6
1525	2	2	0	3	1	2	1	1	3	1	1	-1.65126	2	4
1526	2	1	0	2	1	3	3	1	1	0	2	6.6251	5	5.12
1527	3	1	0	3	1	2	1	1	1	0	1	3.25769	4	4
1528	3	1	0	3	1	2	1	1	1	0	2	6.15266	5	5.6
1529	2	1	1	3	1	2	1	1	2	1	1	4.72424	5	4
1530	2	1	0	2	1	1	1	3	3	0	1	4.25995	4	4
1531	2	2	0	2	1	2	1	1	3	0	1	-1.73828	2	4
1532	3	1	0	2	1	2	2	3	1	0	2	3.96457	4	3.9
1533	3	2	0	2	1	2	1	1	1	0	1	-1.18495	2	5.02
1534	3	2	0	2	1	2	1	1	1	0	2	5.18245	5	4.72
1535	2	1	0	2	1	2	1	3	1	0	2	1.18407	3	3.9
1536	3	1	0	2	1	3	2	3	3	1	3	-1.97271	2	4
1537	3	2	0	2	1	2	1	1	2	0	1	1.49135	3	5.45
1538	3	1	1	3	1	2	1	1	3	1	1	0.0782658	3	4
1539	1	2	0	3	1	2	1	1	2	0	1	4.32707	4	5.04
1540	3	1	0	3	1	2	1	1	1	0	1	6.45476	5	4
1541	2	2	0	2	1	2	1	1	1	0	1	3.10065	4	4
1542	2	1	0	2	1	2	1	1	1	0	1	1.89667	3	4
1543	3	2	0	2	1	2	0	1	1	0	2	1.6092	3	4.6
1544	2	2	0	2	1	2	0	1	1	0	2	1.6092	3	4.6
1545	2	2	0	2	1	2	1	1	1	0	1	1.6092	3	4.6
1546	2	1	0	2	1	2	0	1	1	0	2	5.35048	5	3.9
1547	2	1	0	2	1	2	1	1	1	0	2	5.35048	5	3.9
1548	2	1	0	1	1	2	0	1	1	0	2	-1.72618	2	3.9
1549	2	1	0	1	1	2	1	1	1	0	2	-1.72618	2	3.9
1550	2	2	0	2	1	3	0	1	1	0	2	-8.58601	1	5.86
1551	3	2	0	2	1	3	1	1	4	0	1	-8.58601	1	5.86
1552	3	1	0	3	1	3	0	1	1	0	2	3.68942	4	3.9
1553	2	1	0	3	1	3	1	3	3	0	2	3.68942	4	3.9
1554	2	1	0	2	1	2	0	1	1	0	2	-5.16944	1	3.9
1555	3	1	0	2	1	2	1	1	1	0	2	-5.16944	1	3.9
1556	3	1	0	1	1	2	1	1	1	0	2	6.08307	5	3.9
1557	2	1	0	2	1	2	1	1	3	0	2	-1.34688	2	3.9
1558	3	1	0	2	1	2	1	1	1	0	1	5.02575	5	4
1559	2	2	0	3	1	2	1	1	2	0	1	4.90337	5	6.16
1560	1	1	0	3		3	0	1	1	0	2	5.083	5	5
1561	2	2	0	2	1	3	1	1	4	0	1	3.5169	4	4
1562	3	2	0	3	1	2	1	1	2	0	1	2.76547	4	5.2
1563	1	1	0	1	1	2	1	1	1	0	2	2.47888	3	5.44
1564	1	2	0	1	1	2	1	1	2	0	1	4.0945	4	5.53
1565	1	1	0	1	2	2	0	1	1	0	2	-8.75639	1	3.9
1566	3	1	0	1	2	2	1	1	3	0	2	-8.75639	1	3.9
1567	3	1	0	1	2	2	1	1	1	0	2	6.98272	5	4.05
1568	3	1	0	1	2	2	0	1	1	0	2	6.98272	5	4.05
1569	3	2	0	2	1	2	1	1	1	0	1	4.48553	4	4.37
1570	2	1	0	1	1	2	1	1	1	0	2	1.09789	3	5.87
1571	2	1	0	2	2	2	1	1	2	1	2	2.49291	4	3.9
1572	3	1	0	1	1	3	1	1	1	1	2	7.37982	5	6.3
1573	2	1	0	2	2	2	1	1	3	0	2	4.88996	5	3.9
1574	2	1	0	2	1	2	2	1	3	0	2	6.61957	5	3.9
1575	3	1	0	2		3	0	1	1	0	2	5.04931	5	3.9
1576	1	1	0	1	1	3	1	3	1	0	2	-1.13431	2	3.9
1577	2	2	0	2	2	2	1	1	1	0	1	2.91872	4	5.78
1578	2	1	0	1	1	2	2	3	1	0	2	3.64843	4	4.25
1579	1	1	0	1	1	2	1	1	1	0	1	1.68994	3	4
1580	1	2	0	1	1	2	1	1	1	0	2	3.02764	4	5.34
1581	3	1	0	1	1	2	1	1	1	0	2	1.49267	3	3.9
1582	3	1	0	1	1	2	1	1	1	0	2	1.12053	3	3.9
1583	2	1	0	2	1	2	1	1	1	0	1	2.00646	3	4
1584	3	1	0	1	1	2	2	3	1	0	2	-6.48714	1	3.9
1585	2	1	0	1	1	2	1	1	3	1	1	3.14527	4	4
1586	3	1	0	2	2	2	0	1	1	0	2	4.15841	4	5.06
1587	1	1	0	2	2	2	1	3	1	1	2	4.15841	4	5.06
1588	1	2	0	2	1	2	0	1	1	0	2	4.74926	5	4.42
1589	1	2	0	2	1	2	0	1	1	0	2	4.74926	5	4.42
1590	1	2	0	2	1	2	1	1	2	0	1	4.74926	5	4.42
1591	1	1	0	2	1	2	1	1	1	0	2	7.28253	5	3.9
1592	2	1	0	2	1	2	1	2	3	0	2	3.14612	4	4.12
1593	1	1	0	1	1	2	0	1	1	0	2	3.55853	4	3.9
1594	3	1	0	1	1	2	1	1	1	0	1	3.55853	4	4
1595	3	1	0	1	1	2	1	1	2	0	2	0.430203	3	3.9
1596	2	1	0	1	1	2	1	1	3	0	2	3.68314	4	5.7
1597	2	2	0	2	1	2	1	1	3	0	1	2.11716	3	4.07
1598	2	1	0	2	1	2	1	1	1	0	2	2.20294	3	3.9
1599	2	2	0	1	2	2	1	1	3	0	1	-5.00315	1	4.74
1600	1	1	0	1	2	3	2	3	1	0	2	3.60083	4	6.08
1601	1	1	0	1	1	2	1	1	1	0	1	4.13614	4	4
1602	2	1	0	1	1	2	1	2	1	0	2	1.13923	3	3.9
1603	2	2	0	1	2	3	1	1	1	0	2	-6.05495	1	5.31
1604	3	1	0	2	1	2	1	1	1	0	2	1.754	3	3.9
1605	1	1	0	2	1	2	1	1	3	0	1	-3.99435	1	4
1606	2	1	1	2	1	2	1	1	3	0	1	3.61618	4	4
1607	1	1	0	1	1	2	2	3	1	0	2	5.55214	5	4.72
1608	1	1	0	1	2	2	1	1	3	0	2	-3.82936	1	4.8
1609	2	1	0	2	1	3	3	3	1	0	2	3.38988	4	3.99
1610	2	1	0	1	2	2	1	1	1	0	1	-1.77301	2	4
1611	1	2	0	3	1	2	1	1	2	1	1	6.65643	5	4.04
1612	3	2	0	2	1	2	1	1	1	0	1	4.52256	5	5.13
1613	2	2	0	2	1	2	1	1	2	1	1	0.0563938	3	4.21
1614	3	2	0	1	1	2	1	1	3	0	1	-1.54695	2	4
1615	3	1	0	1	1	2	2	1	1	0	2	3.10216	4	3.9
1616	2	1	0	2	1	2	1	3	1	0	2	-3.67771	1	3.9
1617	1	1	0	1	1	2	2	3	1	0	2	4.4345	4	3.9
1618	3	2	0	1	1	2	1	1	3	1	2	3.17585	4	5.1
1619	1	1	0	2	1	2	2	3	1	0	2	3.04589	4	5.68
1620	1	2	0	2	1	2	1	1	2	0	2	1.23371	3	3.9
1621	2	1	0	1	1	2	1	1	1	0	1	-1.25349	2	4
1622	2	1	0	3	1	2	1	1	3	0	1	-6.61153	1	4.73
1623	2	1	0	2	1	2	2	3	1	0	2	4.63294	5	3.9
1624	1	2	0	2	1	2	1	1	1	0	1	3.57232	4	4
1625	2	1	0	1	1	3	1	1	3	0	2	3.54456	4	3.9
1626	3	2	0	3	1	2	1	1	1	1	1	3.63356	4	4
1627	3	1	0	2	1	2	2	2	1	0	2	-3.10441	1	4.82
1628	3	2	0	2	2	2	1	1	2	1	2	1.03603	3	3.9
1629	2	1	0	1	1	2	1	3	1	0	2	-4.60035	1	3.9
1630	1	1	0	2	2	2	2	3	3	0	2	-1.19965	2	4.9
1631	1	1	0	1	1	2	3	3	1	0	2	0.182893	3	6.31
1632	3	1	0	1	2	2	1	3	1	0	2	1.46025	3	4.64
1633	1	1	0	2	1	2	1	1	1	0	2	4.3966	4	3.9
1634	3	1	0	2	1	2	1	1	1	0	2	-1.12727	2	3.9
1635	3	1	0	2	1	2	1	1	1	0	2	-1.25302	2	4.67
1636	3	1	0	3	1	2	2	1	3	0	2	4.95485	5	4.98
1637	1	1	0	1	1	2	1	2	1	0	2	-5.88818	1	3.9
1638	2	1	0	2	1	2	1	1	1	0	1	-5.69669	1	4
1639	2	2	0	2	1	2	1	1	3	0	2	5.78413	5	3.9
1640	2	2	0	1	2	2	1	1	2	0	1	-0.552592	2	5
1641	2	1	0	1	1	2	1	1	2	0	2	4.27665	4	4.55
1642	3	2	0	1	2	2	1	1	2	0	1	4.2961	4	5.38
1643	1	2	0	3	1	2	1	1	2	1	1	0.227031	3	5.85
1644	2	2	0	2	1	2	1	1	1	0	1	2.21025	3	4
1645	3	1	0	2	1	2	1	1	1	0	1	4.2751	4	4
1646	2	1	0	1	1	1	2	3	1	0	2	2.28667	3	3.9
1647	1	2	0	2	1	2	1	1	1	0	1	4.68657	5	4
1648	1	2	0	1	1	2	1	1	1	0	2	6.5809	5	4.96
1649	1	1	0	1	2	2	1	1	3	0	3	-8.51809	1	4
1650	3	1	0	2	1	2	1	1	1	0	1	-2.71387	2	4
1651	3	1	0	1	1	2	3	3	1	0	2	0.9026	3	3.9
1652	2	1	0	1	1	3	1	1	1	0	2	0.589405	3	3.9
1653	1	1	0	1	1	2	1	1	1	0	2	-1.38409	2	3.9
1654	1	1	0	2	1	2	1	1	2	1	2	1.32431	3	3.9
1655	2	2	0	2	2	3	0	1	1	0	2	2.16353	3	4.92
1656	1	2	0	2	2	3	1	1	1	1	1	2.16353	3	4.92
1657	1	2	0	1	1	2	0	1	1	0	2	1.42644	3	5.22
1658	1	2	0	1	1	2	0	1	1	0	2	1.42644	3	5.22
1659	1	2	0	1	1	2	1	1	1	0	2	1.42644	3	5.22
1660	1	1	0	1	1	2	1	1	3	0	1	-0.209246	2	5.95
1661	3	2	0	2	1	2	1	1	3	0	3	0.798503	3	4
1662	2	1	0	2	1	2	1	3	1	0	2	7.3107	5	3.9
1663	3	1	1	2	1	1	1	3	2	1	2	5.02	5	7.43
1664	2	1	0	2	1	3	1	1	3	1	3	-4.74869	1	5.58
1665	3	1	0	3	1	2	1	1	3	1	1	0.855806	3	6
1666	1	2	1	1	2	2	1	1	1	0	2	7.70991	5	7
1667	2	1	0	1	1	2	1	2	1	0	2	-4.95406	1	5.6
1668	2	2	1	1	1	2	1	1	1	0	1	3.77776	4	7.86
1669	1	1	1	2	2	1	1	1	3	0	2	2.81809	4	7.35
1670	3	2	1	2	1	2	1	1	3	0	1	3.39944	4	7.7
1671	3	2	0	1	1	2	1	1	1	0	1	4.25103	4	5.71
1672	2	1	0	1	1	2	1	1	3	0	3	6.14818	5	4
1673	2	1	0	2	1	2	1	1	3	1	1	-0.181075	2	4
1674	3	1	0	2	2	2	1	1	1	0	2	7.05216	5	3.9
1675	2	1	0	1	1	2	1	1	1	0	1	0.164238	3	4
1676	1	1	0	2	2	2	1	3	1	0	2	6.83171	5	3.9
1677	2	2	0	1	1	2	1	1	1	0	1	6.82222	5	4
1678	2	2	0	1	1	2	1	1	3	0	3	0.403822	3	4.75
1679	3	1	0	1	2	2	0	3	1	0	2	4.90769	5	3.9
1680	3	1	0	1	2	2	1	1	2	0	2	3.50046	4	4.3
1681	3	1	0	1	2	3	2	3	1	0	2	2.02236	3	5.03
1682	1	2	0	1	1	2	1	3	3	0	1	5.11072	5	4
1683	2	1	0	2	1	2	1	1	1	0	1	-6.8949	1	4
1684	3	1	0	2	1	2	1	1	1	0	2	6.40226	5	3.9
1685	3	2	1	1	1	2	1	1	2	0	1	3.33889	4	5.55
1686	2	1	0	1	1	2	1	3	1	0	2	3.20686	4	5.9
1687	3	1	0	3	1	2	1	1	3	0	1	4.45701	4	4
1688	1	2	0	1	1	2	1	1	1	0	1	4.80949	5	4.3
1689	3	1	0	1	1	2	2	3	1	0	2	2.28351	3	3.9
1690	1	2	0	1	1	2	1	1	2	0	1	7.01409	5	5.53
1691	2	1	0	2	3	3	3	3	2	1	1	4.1479	4	4
1692	2	2	0	1	1	2	1	1	1	0	1	3.4472	4	4
1693	3	2	0	1	1	2	1	1	1	0	1	0.622443	3	4
1694	3	2	0	1	1	2	2	1	1	0	2	5.75517	5	6.63
1695	1	2	0	3	1	2	1	1	1	0	1	-4.72599	1	4.69
1696	3	1	0	1	1	2	1	1	2	0	1	7.00239	5	4
1697	3	1	0	2	1	2	1	1	3	0	2	-1.55758	2	3.9
1698	3	1	0	1	2	2	1	2	1	0	2	5.23356	5	3.9
1699	3	1	0	1	1	2	1	2	1	0	2	-0.0943194	2	3.9
1700	2	2	0	1	2	2	1	1	1	0	1	6.5728	5	4
1701	1	1	0	3	1	2	1	1	2	0	1	6.17085	5	5.01
1702	2	1	0	3	1	2	1	1	3	1	1	7.25414	5	4
1703	3	1	0	1	2	2	1	3	2	0	2	2.35158	3	3.9
1704	1	2	0	3	1	2	1	1	2	0	1	6.37469	5	4
1705	3	1	0	2	1	2	1	1	1	0	1	3.10589	4	4
1706	1	1	0	1	1	2	1	1	1	0	1	6.46923	5	4
1707	2	1	0	1	2	2	2	2	3	0	2	-7.59815	1	4.95
1708	3	2	0	2	2	2	1	1	1	0	1	-0.732042	2	5
1709	2	1	0	3	1	2	1	1	3	0	1	4.13696	4	6
1710	3	1	0	3	1	2	1	1	3	1	1	4.71314	5	4
1711	1	1	0	2	1	1	1	3	1	0	2	4.93274	5	3.9
1712	1	2	0	2	2	2	1	1	1	0	1	3.28183	4	4.86
1713	2	1	0	1	1	2	1	1	3	0	2	7.09138	5	3.9
1714	3	2	1	1	1	2	1	1	1	0	1	4.29678	4	7.86
1715	2	1	0	2	1	2	1	1	2	1	2	-0.047686	2	3.9
1716	3	2	0	1	1	1	1	1	1	0	1	0.860832	3	5.25
1717	2	2	0	2	1	2	1	1	1	0	1	-5.44314	1	4
1718	3	2	0	3	1	2	1	1	3	1	1	5.21702	5	4
1719	2	1	0	3	2	2	1	1	3	0	1	1.82905	3	5.14
1720	1	2	1	3	1	2	1	1	2	1	1	-0.486677	2	5.23
1721	2	1	0	2	1	2	1	1	1	0	1	5.35821	5	4
1722	3	1	0	1	2	3	2	3	1	0	2	-2.24833	2	3.9
1723	3	2	0	2	1	2	1	1	2	0	1	5.97711	5	4
1724	2	1	0	3	1	2	1	1	1	0	1	-1.37475	2	4
1725	1	1	0	1	2	2	1	1	1	0	2	1.57756	3	3.9
1726	3	2	0	2	1	3	1	1	1	1	1	3.58277	4	4
1727	2	1	0	2	1	2	1	3	1	0	1	-2.82565	2	6.49
1728	3	2	0	1	2	2	1	1	1	0	1	3.66889	4	4
1729	2	1	0	1	1	2	0	1	1	0	2	4.55678	5	3.9
1730	3	1	0	1	1	2	2	3	1	0	2	4.9915	5	3.9
1731	2	2	0	3	1	2	1	1	3	1	1	-1.9303	2	4
1732	2	2	0	1	2	2	1	1	1	0	1	5.1442	5	4
1733	1	2	0	2	1	2	1	1	3	0	2	3.86501	4	5.42
1734	1	1	0	2	1	2	1	1	3	0	1	3.6015	4	4
1735	2	2	0	1		3	0	1	1	0	2	4.55038	5	4.6
1736	2	1	0	2	2	2	1	1	3	0	2	-5.30923	1	3.9
1737	3	1	1	2	2	2	1	1	1	0	2	4.10303	4	3.9
1738	1	1	0	2	2	3	2	3	2	0	2	4.56193	5	3.9
1739	3	1	0	2	1	2	1	3	3	0	2	4.41977	4	3.9
1740	2	2	0	1	1	2	1	1	1	0	1	6.52375	5	4
1741	1	1	0	1	1	2	1	3	2	0	2	5.23061	5	5.43
1742	2	2	0	1	1	2	1	1	1	0	2	6.05598	5	3.9
1743	2	1	0	3	1	2	1	1	3	1	1	-5.00819	1	4.72
1744	3	1	0	3	1	2	2	3	2	0	2	-5.00819	1	4.72
1745	2	1	0	1	2	2	1	1	3	0	1	-0.272523	2	4
1746	2	2	0	1	1	2	1	1	3	0	1	3.82355	4	4
1747	1	2	0	1	1	2	1	1	3	0	1	3.82355	4	4
1748	3	1	0	1		3	0	1	1	0	2	-0.835411	2	3.9
1749	3	1	0	2	1	2	1	1	1	0	2	3.80524	4	5.86
1750	1	2	0	2	1	2	1	1	1	0	1	3.76651	4	5
1751	2	1	0	2	1	2	1	1	3	0	2	3.65539	4	4.84
1752	3	1	0	2	2	2	1	1	2	0	1	0.341354	3	4
1753	3	2	0	2	1	2	1	1	3	0	1	4.5204	5	5.8
1754	3	2	0	2		3	0	1	1	0	2	6.83525	5	4.73
1755	2	1	0	1	2	2	2	3	1	0	2	-2.90373	2	5.34
1756	2	1	0	1	1	2	1	1	2	0	1	6.0704	5	4
1757	3	2	0	1	1	2	1	1	1	0	1	4.07773	4	5.58
1758	1	2	0	2	1	2	1	1	3	1	1	6.13574	5	5
1759	1	1	0	1	1	2	1	1	3	0	1	-0.675467	2	4
1760	3	1	0	2	1	2	1	1	1	0	2	3.51505	4	3.9
1761	3	2	0	2	1	2	1	1	1	0	1	-8.67997	1	4.53
1762	3	1	0	1	1	2	1	1	3	0	1	4.15247	4	4
1763	1	1	0	2	1	2	1	1	3	0	3	7.47781	5	4
1764	3	1	0	3	1	2	1	1	3	0	1	5.89701	5	4.23
1765	3	2	0	2	1	2	1	1	1	0	1	3.66138	4	4
1766	1	2	0	3		3	0	1	1	0	2	-2.17578	2	4.78
1767	2	1	0	2	1	2	1	1	3	0	2	2.64522	4	4.45
1768	2	1	0	1	1	3	1	1	2	0	1	3.247	4	4
1769	2	2	0	1	1	2	1	1	2	0	2	-6.42544	1	4.75
1770	3	2	0	1	1	2	1	1	1	0	1	5.68276	5	4.3
1771	1	2	0	1	1	2	1	1	2	0	1	4.59538	5	5.4
1772	2	1	0	2	1	2	1	1	2	0	2	4.19318	4	3.9
1773	3	1	0	2	1	3	0	1	1	0	2	2.9112	4	4.45
1774	3	1	0	2	1	3	1	1	1	0	2	2.9112	4	4.45
1775	1	1	0	1	1	2	0	1	1	0	2	4.25011	4	5.6
1776	3	1	0	1	1	2	1	3	3	0	2	4.25011	4	5.6
1777	3	1	0	1	2	2	0	1	1	0	2	-1.97706	2	3.9
1778	2	1	0	1	2	2	0	1	1	0	2	-1.97706	2	3.9
1779	2	1	0	1	2	2	1	1	3	0	2	-1.97706	2	3.9
1780	3	1	0	1	2	2	2	1	1	0	2	5.24262	5	3.9
1781	3	1	0	1	2	2	0	1	1	0	2	5.24262	5	3.9
1782	3	1	0	1	2	2	2	1	1	0	2	5.24262	5	3.9
1783	3	1	0	1	2	2	0	1	1	0	2	5.24262	5	3.9
1784	3	1	0	1	2	2	0	1	1	0	2	-1.7411	2	4.96
1785	3	1	0	1	2	2	2	3	1	0	3	4.30376	4	4.96
1786	3	2	0	1	1	2	1	1	1	0	2	-2.46464	2	5.69
1787	3	2	0	3	1	2	1	1	2	1	1	5.27351	5	4
1788	3	2	0	3	1	2	1	1	2	1	1	5.27351	5	4
1789	1	2	0	1	1	2	1	1	1	0	1	-1.16364	2	5.25
1790	2	2	0	1	1	2	1	1	1	0	1	-1.16364	2	5.25
1791	3	2	0	2	1	2	1	1	3	0	1	-7.8607	1	4.73
1792	2	2	0	2	1	2	1	1	3	0	1	4.95714	5	4.2
1793	2	2	0	2	1	2	1	1	3	0	1	4.95714	5	4.2
1794	2	2	1	1	1	2	1	1	3	0	1	5.12107	5	4.1
1795	2	2	1	1	1	2	1	1	3	0	1	5.12107	5	4.1
1796	3	1	0	1	1	2	1	1	1	0	2	1.73901	3	3.9
1797	3	1	0	2	1	2	1	1	3	0	2	4.40488	4	3.95
1798	3	1	0	1	1	2	1	1	3	0	3	-3.27877	1	6.39
1799	3	1	0	2	1	2	1	1	1	0	2	1.82312	3	4.3
1800	2	2	0	1	1	2	1	1	1	0	1	4.78618	5	5.3
1801	3	1	0	2	1	2	1	3	2	0	2	3.05273	4	5
1802	1	1	0	1	1	2	1	1	1	0	2	3.18134	4	4.98
1803	3	1	0	2	1	2	1	3	2	0	2	-0.374469	2	5.92
1804	3	1	0	2	1	2	1	1	1	0	3	-8.16272	1	4.11
1805	3	2	0	1	1	2	1	1	1	0	1	5.19765	5	5.35
1806	3	1	0	1	1	2	1	1	1	0	2	-1.65281	2	4.85
1807	3	2	0	2	1	2	1	1	2	0	1	-1.42943	2	6.02
1808	2	2	0	1	2	2	1	1	1	0	2	-4.37238	1	5.38
1809	3	2	0	2	1	2	1	1	3	0	2	-2.90944	2	3.9
1810	2	1	0	1	1	2	1	1	1	0	2	-8.81341	1	3.9
1811	3	1	0	1	1	2	1	1	3	0	1	-6.38133	1	4
1812	3	2	0	1	1	2	1	1	2	0	1	6.62886	5	4.9
1813	2	1	0	1	1	2	1	1	1	0	2	4.17261	4	3.9
1814	1	1	0	2	1	2	1	1	2	0	2	-3.16755	1	4.22
1815	1	1	0	3	1	2	1	1	1	0	2	6.71397	5	3.9
1816	2	1	0	2	1	1	1	1	1	0	1	-8.35169	1	5.8
1817	3	2	0	1	1	2	1	1	1	0	1	-0.280453	2	4
1818	3	2	0	2	1	2	1	1	4	0	1	4.46341	4	5.94
1819	3	1	0	2	1	2	1	1	3	1	2	-0.322499	2	3.9
1820	2	1	0	2	1	2	1	1	1	0	1	0.416707	3	5
1821	2	1	0	1	1	2	1	1	1	0	1	4.18596	4	4
1822	3	1	0	1	2	2	2	1	2	0	2	4.52343	5	4.85
1823	2	2	0	3	1	2	1	1	4	1	1	6.43169	5	4
1824	3	1	0	3	1	2	1	1	3	1	2	-0.412679	2	5.3
1825	3	1	0	3	1	2	1	1	1	0	1	5.38864	5	5.1
1826	3	1	0	3	1	1	1	1	1	0	1	2.65505	4	4
1827	3	2	0	3	1	2	1	1	3	0	1	5.04291	5	4.31
1828	2	1	0	3	1	2	1	1	3	0	1	0.302596	3	4
1829	2	1	0	1	1	2	1	3	2	1	1	-3.75651	1	4
1830	1	1	0	3	1	2	1	3	2	0	1	1.35373	3	4
1831	1	2	0	3	1	2	1	1	1	0	1	-7.90587	1	6.63
1832	3	1	0	2	1	2	1	1	1	0	1	-8.55343	1	4
1833	1	2	0	1	2	2	1	1	1	0	2	1.28342	3	5.6
1834	3	1	0	2	1	2	2	3	2	0	2	1.91612	3	5.9
1835	1	1	0	2	1	2	1	1	3	0	2	-3.81156	1	3.9
1836	1	1	0	2	1	2	1	1	3	0	2	4.2756	4	3.9
1837	1	1	0	1	1	2	1	1	2	0	2	-3.88036	1	3.9
1838	1	2	0	1	1	2	1	1	1	0	2	-0.375453	2	5
1839	3	2	0	2	1	2	1	1	3	0	1	4.31713	4	4.64
1840	2	1	0	2	1	2	1	1	2	0	2	4.71005	5	4.23
1841	1	1	0	1	1	2	1	3	3	0	2	3.67753	4	3.9
1842	3	1	1	1	1	2	1	3	1	0	2	-0.94748	2	8.6
1843	3	1	0	2	1	2	2	3	1	0	2	6.71478	5	3.9
1844	1	2	0	2	1	2	1	1	1	0	1	-8.97938	1	5
1845	1	1	0	2	1	2	1	1	3	1	2	6.00906	5	5
1846	2	1	1	1	2	2	2	3	1	0	2	4.61694	5	8.74
1847	3	1	0	1	2	2	1	1	1	0	2	-7.88228	1	5
1848	3	1	0	1	1	2	1	1	1	0	2	-8.48905	1	5.24
1849	3	1	0	3	1	2	1	1	1	0	1	-1.4137	2	4
1850	2	2	0	1	1	2	1	1	1	0	1	4.37416	4	5.23
1851	3	1	0	1	1	2	1	1	3	0	2	2.2367	3	3.9
1852	1	1	0	2	1	2	1	3	1	0	2	-1.67916	2	3.9
1853	3	1	0	2	1	2	1	1	1	0	2	5.82159	5	3.9
1854	1	2	0	2	1	2	1	1	1	0	2	4.00834	4	3.9
1855	2	2	0	1	1	2	1	1	2	0	1	6.5579	5	4
1856	1	1	0	2	1	2	1	1	3	0	2	-7.90653	1	5.5
1857	2	1	0	2	1	3	2	3	1	0	2	1.13521	3	3.9
1858	2	2	0	2	1	2	1	1	1	0	1	-7.88809	1	4
1859	3	2	0	1	1	2	1	1	1	0	1	3.49736	4	4
1860	2	2	0	1	1	2	1	1	3	0	2	-3.94626	1	3.9
1861	3	2	0	2	1	2	1	1	3	0	1	6.16345	5	4.3
1862	2	1	0	1	1	2	1	1	3	0	1	6.84978	5	4
1863	3	1	0	1	1	2	1	1	1	0	2	4.91311	5	3.9
1864	3	2	0	1	1	2	1	1	1	0	1	5.00956	5	6.35
1865	2	2	0	3	1	2	1	1	2	0	1	-1.84241	2	4
1866	3	2	0	2	1	2	1	1	2	0	1	-1.49148	2	5.3
1867	3	2	0	2	1	2	1	1	2	0	1	-1.85104	2	4
1868	3	2	0	1	1	2	1	1	3	0	1	7.00355	5	5.87
1869	2	1	1	1	1	2	1	2	1	0	2	-1.61192	5	14.3
1870	3	1	0	2	2	2	1	1	1	0	1	-0.521182	2	4
1871	2	1	0	1	1	1	2	1	3	0	1	-8.64912	1	4
1872	1	1	0	2	1	2	2	3	1	0	2	-2.30619	2	6.47
1873	2	1	0	2	1	2	1	1	3	0	2	2.32185	3	3.9
1874	3	1	0	1	1	3	1	1	1	0	3	-7.71435	1	4
1875	1	2	0	1	1	2	1	1	1	0	2	-1.23501	2	4.45
1876	2	1	0	1	1	2	1	1	1	0	2	2.43991	3	4.2
1877	1	1	0	1	1	2	1	1	2	0	2	4.01911	4	3.9
1878	3	2	0	1	1	2	1	1	1	0	1	1.64034	3	6.13
1879	2	2	0	2	1	2	1	1	3	0	1	0.145536	3	4.74
1880	1	1	0	2	1	2	2	1	1	0	2	1.87478	3	5.6
1881	2	2	0	1	1	2	1	1	3	0	1	-3.91045	1	5.58
1882	3	1	0	1	1	2	1	1	1	0	2	1.08234	3	3.9
1883	3	1	0	1	1	2	2	3	1	0	2	-1.52706	2	3.9
1884	3	1	0	2	1	2	1	3	1	0	2	-1.87561	2	3.9
1885	2	1	0	2	1	2	1	1	2	0	1	4.4261	4	4
1886	1	1	0	2	1	2	1	1	2	0	1	3.33032	4	4
1887	1	1	0	2	1	2	1	1	1	0	2	6.07705	5	5.4
1888	3	2	0	2	1	2	1	1	2	0	1	0.797078	3	6.02
1889	2	1	1	3	1	2	1	1	1	0	2	0.617158	3	7.38
1890	3	1	0	2	1	2	1	3	3	0	2	-2.64154	2	6.37
1891	3	1	0	2	1	3	2	3	2	1	2	-1.34695	2	3.9
1892	2	1	0	1	1	2	1	1	2	1	1	2.89751	4	4
1893	2	2	0	1	1	2	1	1	1	0	1	5.30007	5	5.03
1894	2	1	0	1	1	2	2	2	1	0	2	4.48	4	6.42
1895	3	1	0	2	1	2	1	1	1	0	1	-8.12239	1	4
1896	1	1	0	2	1	2	1	1	1	0	2	7.42311	5	6.05
1897	3	2	1	1	1	2	1	1	3	0	1	-3.37376	1	7.73
1898	1	2	0	2	1	3	1	1	2	0	2	-3.22917	1	3.9
1899	3	1	0	1	1	2	1	1	3	0	2	2.20034	3	5.6
1900	3	1	0	1	1	2	1	1	1	0	2	4.39874	4	5.19
1901	2	1	0	1	1	2	1	3	3	0	2	0.19938	3	3.9
1902	3	1	0	1	1	2	1	3	2	0	2	1.79101	3	3.9
1903	2	2	0	1	1	2	1	1	1	0	1	1.72665	3	5.6
1904	2	1	1	1	1	2	1	1	1	0	2	0.865123	5	10
1905	3	1	0	2	1	2	1	1	2	0	1	-0.645501	2	5.03
1906	2	2	0	2	1	2	1	1	1	0	1	-1.10854	2	4
1907	3	1	1	3	1	2	1	1	1	1	1	0.232982	3	5
1908	3	1	0	1	1	2	1	3	3	0	2	1.70001	3	5.67
1909	1	1	0	2	1	2	1	1	1	0	2	3.88672	4	5.18
1910	2	2	0	2	1	2	1	1	3	0	2	0.444588	3	5.4
1911	2	1	0	2	1	2	1	1	3	0	2	-0.709715	2	3.9
1912	1	1	0	1	1	2	1	1	1	0	1	-3.07943	1	4
1913	2	1	0	2	1	2	1	3	2	0	2	1.19694	3	5.76
1914	3	1	0	1	2	2	2	2	1	0	2	2.68964	4	5.39
1915	3	2	0	1	1	2	1	1	1	0	1	-1.63165	2	4
1916	3	1	1	3	1	1	1	1	3	1	1	4.17513	4	5.5
1917	1	1	0	1	1	2	1	1	1	0	2	-8.51264	1	3.9
1918	1	2	0	1	1	2	1	1	1	0	1	-8.02258	1	5.8
1919	3	1	0	3	1	2	1	1	2	0	1	0.0116323	2	4
1920	3	1	1	3	1	2	1	1	3	1	2	2.06984	3	7.54
1921	3	2	0	3	1	2	1	1	1	0	1	2.39566	3	5.2
1922	2	1	0	3	1	2	1	1	1	0	2	2.93755	4	4.03
1923	2	2	0	3	1	2	1	1	3	1	1	-4.51286	1	5.5
1924	2	1	0	3	1	1	1	1	1	0	1	1.72975	3	6
1925	3	2	0	3	1	2	1	1	1	0	1	7.23356	5	6
1926	1	1	1	1	1	2	1	3	1	0	2	0.932561	3	7.41
1927	2	2	0	2	1	2	1	1	3	0	2	0.986714	3	3.9
1928	1	2	0	2	1	2	1	1	1	0	1	-7.40951	1	5.74
1929	2	2	0	2	1	2	1	1	2	0	1	5.01028	5	5
1930	3	1	0	2	1	2	1	1	1	0	2	1.8812	3	3.9
1931	1	1	0	2	1	2	1	1	1	0	2	1.8812	3	3.9
1932	2	2	0	3	1	2	1	1	2	0	1	2.29634	3	5.81
1933	3	1	0	3	2	2	1	1	1	0	1	7.5859	5	4
1934	2	2	0	2	1	2	1	1	2	0	1	-1.49831	2	4
1935	2	1	0	2	1	2	1	1	2	0	2	2.78776	4	5
1936	2	2	0	2	1	2	1	1	3	1	1	-6.5798	1	5.6
1937	2	1	0	3	1	2	1	1	3	0	1	4.09536	4	5
1938	1	2	0	1	2	2	1	1	1	0	1	2.59427	4	5.6
1939	2	1	0	2	2	2	1	1	1	0	2	-0.258954	2	4.82
1940	3	2	0	1	1	2	1	1	3	0	1	0.571603	3	5.6
1941	1	2	0	2	1	2	1	1	1	0	1	4.18302	4	4
1942	3	2	0	2	1	2	1	1	1	0	1	2.35172	3	4.66
1943	2	1	0	2	1	2	1	1	1	0	2	2.01023	3	5.89
1944	3	1	0	1	2	2	1	3	1	0	2	3.47568	4	3.9
1945	3	1	0	1	2	2	2	3	3	0	2	-8.27696	1	4.55
1946	1	1	0	1	1	2	1	3	1	0	2	0.391363	3	6.12
1947	1	2	0	1	1	2	1	1	2	1	1	4.28402	4	5.16
1948	3	2	0	1	1	2	1	1	1	0	2	2.19554	3	5.92
1949	2	2	0	1	1	2	1	1	1	0	1	3.74296	4	4.71
1950	3	2	0	2	1	2	1	1	2	0	1	-0.059005	2	5.58
1951	3	2	0	1	1	2	1	1	1	0	2	4.14796	4	5.05
1952	2	1	0	2	1	2	1	1	1	0	1	-0.859112	2	4
1953	2	2	0	1	1	2	1	1	1	0	1	2.18887	3	6.02
1954	1	1	0	2	1	2	2	2	3	1	2	5.66271	5	6.71
1955	3	1	1	1	1	1	2	3	1	0	2	-1.03934	2	7.28
1956	3	2	0	2	2	2	1	1	1	0	1	1.63545	3	5.53
1957	2	1	0	2	1	2	1	1	1	0	2	-1.4799	2	3.9
1958	2	1	0	2	2	2	1	3	3	0	2	5.5489	5	3.9
1959	1	2	0	2	1	2	1	1	1	1	2	-5.66693	1	3.9
1960	3	1	0	1	2	2	2	1	1	0	2	-0.474501	2	5.8
1961	3	2	0	2	2	2	1	1	1	0	1	0.479073	3	4.59
1962	2	1	0	2	2	2	2	1	2	0	2	-0.699912	2	3.9
1963	3	1	0	1	2	3	1	1	2	0	2	2.49966	4	5.71
1964	2	1	0	2	1	2	2	3	3	0	2	2.83961	4	4.3
1965	1	2	0	1	2	2	1	1	1	0	1	6.0459	5	6
1966	2	2	0	1	2	2	1	1	1	0	1	6.0459	5	6
1967	3	1	0	2	2	2	1	1	1	0	2	4.63909	5	3.9
1968	1	1	0	2	2	2	1	1	1	0	2	-4.7944	1	4.47
1969	3	2	0	2	1	2	1	1	1	0	1	-1.85347	2	6.25
1970	3	2	0	2	1	2	1	1	2	0	1	4.60934	5	4.43
1971	2	1	0	2	2	2	1	1	3	0	2	-1.04685	2	4.11
1972	2	1	0	1	1	2	1	3	1	0	2	2.08698	3	5.33
1973	3	2	0	2	1	2	1	1	1	0	1	2.75236	4	4
1974	3	2	0	1	2	2	1	1	3	0	1	4.96992	5	4
1975	1	1	0	1	2	2	1	1	1	0	1	7.48266	5	4
1976	2	1	0	2	1	2	1	1	1	0	1	4.56598	5	4
1977	2	1	1	2	2	2	1	1	1	0	2	-1.693	2	8.12
1978	2	1	0	2	2	2	2	1	2	1	2	2.51876	4	3.9
1979	1	1	0	1	2	2	1	1	1	0	1	3.7626	4	4
1980	3	2	0	3	1	2	1	1	1	0	1	3.00591	4	6.42
1981	2	2	0	3	1	2	1	1	3	1	1	4.06677	4	5.6
1982	2	1	0	2	1	2	1	3	2	0	3	-0.932211	2	5.89
1983	1	1	0	1	2	3	1	3	2	0	2	-5.76771	1	4.9
1984	3	2	0	3		2	1	1	3	0	1	4.64943	5	5.95
1985	3	1	0	3	1	3	1	1	1	0	1	5.22281	5	4
1986	3	2	0	3	1	3	1	1	4	0	1	2.97845	4	6.11
1987	3	2	0	2	1	2	1	1	4	0	1	7.4441	5	4.8
1988	3	1	0	1	2	3	1	1	1	0	2	1.93463	3	3.9
1989	2	2	0	2	2	2	1	1	1	0	2	3.39461	4	4.42
1990	1	1	0	2	2	1	1	1	1	0	2	5.39338	5	3.9
1991	2	2	0	2	1	2	1	1	3	0	1	-0.23051	2	5.45
1992	1	1	0	2	2	2	2	1	1	0	1	1.45186	3	5.34
1993	3	1	0	2	1	2	1	1	3	0	2	5.74149	5	6.23
1994	2	1	0	1	1	2	1	2	1	0	2	-2.63705	2	5.96
1995	3	2	0	2	1	2	1	1	1	0	2	3.59197	4	4.6
1996	1	1	0	1	1	1	1	2	2	0	2	1.60064	3	5.9
1997	2	1	0	1	2	3	1	1	1	0	2	0.845903	3	5.08
1998	2	1	0	2	2	3	2	1	1	0	2	-3.18186	1	6.12
1999	1	1	1	2	1	2	2	3	3	0	2	4.37021	4	8.03
[truncated: 3,106 more rows]
