# Supplementary material for: Association between Dietary Inflammatory Index and Type 2 diabetes mellitus in Xinjiang Uyghur autonomous region, China
Source: PeerJ. 2021 Jul 16;9:e11159. doi: 10.7717/peerj.11159 (PMC8288110; doi:10.7717/peerj.11159)
Supplement: File S2 [file peerj-09-11159-s002.xlsx]

## Sheet: Sheet1
BMI classify	1	BMI<24kg/m2
	2	BMI 24-28kg/m2
	3	BMI>28 kg/m2
sex classify	1	Male
	2	Female
ethic classify	1	Han
	2	Kazak
	3	Hui
	4	Uyghur
	5	Others
Group(T2DM vs. Non-T2DM )	1	T2DM
	0	Non-T2DM
age classify	1	<45
	2	45-60
	3	>60
Educational level	1	Low
	2	Medium
	3	High
economy	1	≤9900 yuan
	2	9900～49999yuan
	3	≥50000yuan
alcohol	1	Never
	2	Once in a while
	3	Usually
smoke	1	Never
	2	Once in a while
	3	Usually
Health	1	well
	2	better
	3	common
	4	poor
hyperhension	1	hyperhension
	0	non-hyperhension
activity	1	Low
	2	Medium
	3	High
DII classify	1	Q1
	2	Q2
	3	Q3
	4	Q4
	5	Q5
