# Supplementary material for: Association between Dietary Inflammatory Index and Type 2 diabetes mellitus in Xinjiang Uyghur autonomous region, China
Source: PeerJ journal article supplement (doi:10.7717/peerj.11159), 2021-07-16
Supplement: Supplemental_File_3.pdf [file Supplemental_File_3.pdf]

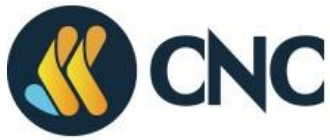

National key research and development plan "Precision medicine  
research" key special northwest region natural population queue  
research

Study on cohort construction and health follow-up of natural  
multiethnic population in Xinjiang

**Subject Questionnaire**

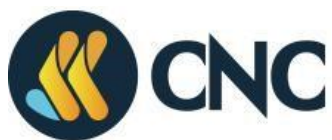

Physical examination number:

## Baseline Questionnaire

|                                                                                                                                                                                                                                                                                      |                                     |                                                                                                                                                                            |
|--------------------------------------------------------------------------------------------------------------------------------------------------------------------------------------------------------------------------------------------------------------------------------------|-------------------------------------|----------------------------------------------------------------------------------------------------------------------------------------------------------------------------|
| Name:                                                                                                                                                                                                                                                                                |                                     | Sex: ①Male ②Female                                                                                                                                                         |
| Age:                                                                                                                                                                                                                                                                                 | — — years                           | Date: __ Year __ month __ day                                                                                                                                              |
| The survey process                                                                                                                                                                                                                                                                   |                                     |                                                                                                                                                                            |
| NO.                                                                                                                                                                                                                                                                                  | content                             | Sign√ when finished                                                                                                                                                        |
| 1                                                                                                                                                                                                                                                                                    | Registration form, informed consent | <input type="checkbox"/>                                                                                                                                                   |
| 2                                                                                                                                                                                                                                                                                    | Collection of blood specimens       | <input type="checkbox"/>                                                                                                                                                   |
| 3                                                                                                                                                                                                                                                                                    | Measure Blood pressure              | <input type="checkbox"/>                                                                                                                                                   |
| 4                                                                                                                                                                                                                                                                                    | Measure height, waist circumference | <input type="checkbox"/>                                                                                                                                                   |
| 5                                                                                                                                                                                                                                                                                    | Measure weight, body fat            | <input type="checkbox"/>                                                                                                                                                   |
| 6                                                                                                                                                                                                                                                                                    | Consultation investigation          | <input type="checkbox"/>                                                                                                                                                   |
| 7                                                                                                                                                                                                                                                                                    | Table check                         | <input type="checkbox"/>                                                                                                                                                   |
| Medical examination items                                                                                                                                                                                                                                                            |                                     |                                                                                                                                                                            |
| <b>1.1 Height (cm)</b> — — — . —<br><b>1.2 Waist (cm)</b> — — — . —<br><b>1.3 Heart rate (Times/min)</b><br>— — —<br><b>1.4 Blood pressure (mmHg)</b><br>Systolic pressure      Diastolic pressure<br>First time    — — — . —      — — — . —<br>Second time — — — . —      — — — . — |                                     | <b>1.5 Weight (kg)</b> — — — . —<br><b>1.6 Body fat composition</b><br>Body fat rate (%)      — — — . —<br>Body fat (kg)      — — — . —<br>Muscle mass (kg)      — — — . — |

1.General information (Please tick  $\sqrt{\quad}$  on the appropriate box  $\bigcirc$ , Please fill in the information in the  $\square$  as require)

**1.1 Physical examination number:** (See cover)

**1.2** The name of your organization: \_\_\_\_\_

**1.3 Sex:** (See cover)      ☐ Male      ☐ Female

**1.4 Date of birth:**   □□□□ year□□month□□day

**1.5 ID number:**

**1.5.1 Medicare number:**

**1.6 Home Address:** Xinjiang Uygur Autonomous Region (City/Autonomous Prefecture)  
 \_\_\_\_\_Streets/towns \_\_\_\_\_Neighborhood committee/village

**1.7 Cell phone number:**

**1.7.1 Important contact phone number:**

## 1.8 Your national

☐ Han
 ☐ Hui  
☐ Uyghur
 ☐ Kazak  
☐ Other (**1.8a**)

**1.9** What is the highest education you have received?

☐ Had no formal schooling      ☐ Junior college  
☐ Primary school      ☐ College  
☐ Junior high school      ☐ Graduate or above  
☐ High schools (including technical/technical schools)

**1.10** What was your family's total income (including all sources) last year?

☐ <2,500 yuan
 ☐ 35,000-49,900 yuan  
☐ 2,500-4,999 yuan
 ☐ 50,000-74,900 yuan  
☐ 5,000-9,999 yuan
 ☐ 75,000-999,000 yuan  
☐ 10,000-19,900 yuan
 ☐ 100,000-199,000 yuan  
☐ 20,000-34,900 yuan
 ☐ ≥200,000 yuan

**2. Tea and coffee consumption** (Please tick  $\sqrt{\quad}$  on the appropriate box  $\bigcirc$ , Please fill in the information in the  $\square$  as require)

**2.1 How often have you had tea in the past year?**

- ☐ never or almost never drink
- ☐ only on special occasions (such as holidays) drink occasionally
- ☐ drink only on special season of a year (Such as busy farming or summer)
- ☐ regardless of season, every month to drink, but the frequency less than once a week
- ☐ regardless of season, basically every week

**2.2 How often have you had coffee in the past year?**

- ☐ Never or almost never drink coffee
- ☐ only on special occasions (Such as holidays) drink occasionally
- ☐ drink every month, but the frequency less than once a week
- ☐ basically, drink every week

**2.3 When did you start the habit of drinking coffee every week?**  $\square$   $\square$  year

**3. Drinking** (Please tick  $\sqrt{\quad}$  on the appropriate box  $\bigcirc$ )

**3.1 How often have you had a drink in the past year?**

- ☐ never or almost never drink
- ☐ only on special occasions (such as holidays) drink occasionally
- ☐ drink only on special season of a year (Such as busy farming or summer)
- ☐ regardless of season, every month to drink, but the frequency less than once a week
- ☐ regardless of season of a year, basically every week

**4. Smoking** (Please tick  $\sqrt{\quad}$  on the appropriate box  $\bigcirc$ , Please fill in the information in the  $\square$  as require)

**4.1 How often do you smoke now?**

- ☐ Never
- ☐ occasionally
- ☐ most days
- ☐ every day

**4.2 If you used to smoke but have stopped, how long have you quit?**  $\square$   $\square$  year  $\square$   $\square$  month

**4.3 What is the most important reason for you to quit smoking? (Please choose the main answer)**

- ☐ because suffer from diseases
- ☐ Family against
- ☐ worry affect the health of the future (not yet ill)
- ☐ doctor's suggestion
- ☐ due to the economic burden
- ☐ other

**4.4 When do you start the habit of smoking every day or almost every day?**  $\square$   $\square$  year

**4.5 Have you ever tried to quit smoking (It must last at least one week) ?** ☐ Yes ☐ No

5. Dietary situation (Please tick ✓ on the appropriate box○, Please fill in the information in the\_\_\_\_ as require )

5.1 In the past year, how often did you eat the following foods or drinks? (Please select one in each row to ✓ , and fill in the intake, if the intake is not clear, please enter 999)

|                           | Everyday              | 4-6<br>times/week     | 1-3<br>times/week     | 1-3<br>times/month    | No/<br>very<br>little | amount of<br>each serving |
|---------------------------|-----------------------|-----------------------|-----------------------|-----------------------|-----------------------|---------------------------|
| <b><u>staple food</u></b> | <input type="radio"/> | <input type="radio"/> | <input type="radio"/> | <input type="radio"/> | <input type="radio"/> | ___liang/time             |
| rice                      | <input type="radio"/> | <input type="radio"/> | <input type="radio"/> | <input type="radio"/> | <input type="radio"/> | ___liang/time             |
| millet                    | <input type="radio"/> | <input type="radio"/> | <input type="radio"/> | <input type="radio"/> | <input type="radio"/> | ___liang/time             |
| noodles                   | <input type="radio"/> | <input type="radio"/> | <input type="radio"/> | <input type="radio"/> | <input type="radio"/> | ___liang/time             |
| steamed bun               | <input type="radio"/> | <input type="radio"/> | <input type="radio"/> | <input type="radio"/> | <input type="radio"/> | ___liang/time             |
| deep-fried dough cake     | <input type="radio"/> | <input type="radio"/> | <input type="radio"/> | <input type="radio"/> | <input type="radio"/> | ___liang/time             |
| deep-fried dough stick    | <input type="radio"/> | <input type="radio"/> | <input type="radio"/> | <input type="radio"/> | <input type="radio"/> | ___liang/time             |
| coarse cereals            | <input type="radio"/> | <input type="radio"/> | <input type="radio"/> | <input type="radio"/> | <input type="radio"/> | ___liang/time             |
| <b><u>animal food</u></b> |                       |                       |                       |                       |                       |                           |
| pork                      | <input type="radio"/> | <input type="radio"/> | <input type="radio"/> | <input type="radio"/> | <input type="radio"/> | ___liang/time             |
| mutton                    | <input type="radio"/> | <input type="radio"/> | <input type="radio"/> | <input type="radio"/> | <input type="radio"/> | ___liang/time             |
| shashlik                  | <input type="radio"/> | <input type="radio"/> | <input type="radio"/> | <input type="radio"/> | <input type="radio"/> | ___liang/time             |
| beef                      | <input type="radio"/> | <input type="radio"/> | <input type="radio"/> | <input type="radio"/> | <input type="radio"/> | ___liang/time             |
| beef jerky                | <input type="radio"/> | <input type="radio"/> | <input type="radio"/> | <input type="radio"/> | <input type="radio"/> | ___liang/time             |
| horse meat                | <input type="radio"/> | <input type="radio"/> | <input type="radio"/> | <input type="radio"/> | <input type="radio"/> | ___liang/time             |
| chicken                   | <input type="radio"/> | <input type="radio"/> | <input type="radio"/> | <input type="radio"/> | <input type="radio"/> | ___liang/time             |
| duck                      | <input type="radio"/> | <input type="radio"/> | <input type="radio"/> | <input type="radio"/> | <input type="radio"/> | ___liang/time             |
| pigeon meat               | <input type="radio"/> | <input type="radio"/> | <input type="radio"/> | <input type="radio"/> | <input type="radio"/> | ___liang/time             |
| prawn                     | <input type="radio"/> | <input type="radio"/> | <input type="radio"/> | <input type="radio"/> | <input type="radio"/> | ___liang/time             |
| Fish (Labeled<br>species) | <input type="radio"/> | <input type="radio"/> | <input type="radio"/> | <input type="radio"/> | <input type="radio"/> | ___liang/time             |
| egg                       | <input type="radio"/> | <input type="radio"/> | <input type="radio"/> | <input type="radio"/> | <input type="radio"/> | ___liang/time             |

|                        |                       |                       |                       |                       |                       |               |
|------------------------|-----------------------|-----------------------|-----------------------|-----------------------|-----------------------|---------------|
| duck egg               | <input type="radio"/> | <input type="radio"/> | <input type="radio"/> | <input type="radio"/> | <input type="radio"/> | ___liang/time |
| Quail eggs<br>(spiced) | <input type="radio"/> | <input type="radio"/> | <input type="radio"/> | <input type="radio"/> | <input type="radio"/> | ___liang/time |
| Visceral animal        | <input type="radio"/> | <input type="radio"/> | <input type="radio"/> | <input type="radio"/> | <input type="radio"/> | ___liang/time |
| lamb liver             | <input type="radio"/> | <input type="radio"/> | <input type="radio"/> | <input type="radio"/> | <input type="radio"/> | ___liang/time |
| beef liver             | <input type="radio"/> | <input type="radio"/> | <input type="radio"/> | <input type="radio"/> | <input type="radio"/> | ___liang/time |
| chicken liver          | <input type="radio"/> | <input type="radio"/> | <input type="radio"/> | <input type="radio"/> | <input type="radio"/> | ___liang/time |

### **vegetable food**

|                     |                       |                       |                       |                       |                       |               |
|---------------------|-----------------------|-----------------------|-----------------------|-----------------------|-----------------------|---------------|
| fresh vegetables    | <input type="radio"/> | <input type="radio"/> | <input type="radio"/> | <input type="radio"/> | <input type="radio"/> | ___liang/time |
| carrot              | <input type="radio"/> | <input type="radio"/> | <input type="radio"/> | <input type="radio"/> | <input type="radio"/> | ___liang/time |
| white radish        | <input type="radio"/> | <input type="radio"/> | <input type="radio"/> | <input type="radio"/> | <input type="radio"/> | ___liang/time |
| radish              | <input type="radio"/> | <input type="radio"/> | <input type="radio"/> | <input type="radio"/> | <input type="radio"/> | ___liang/time |
| green turnip        | <input type="radio"/> | <input type="radio"/> | <input type="radio"/> | <input type="radio"/> | <input type="radio"/> | ___liang/time |
| long bean           | <input type="radio"/> | <input type="radio"/> | <input type="radio"/> | <input type="radio"/> | <input type="radio"/> | ___liang/time |
| eggplant            | <input type="radio"/> | <input type="radio"/> | <input type="radio"/> | <input type="radio"/> | <input type="radio"/> | ___liang/time |
| tomato              | <input type="radio"/> | <input type="radio"/> | <input type="radio"/> | <input type="radio"/> | <input type="radio"/> | ___liang/time |
| chili               | <input type="radio"/> | <input type="radio"/> | <input type="radio"/> | <input type="radio"/> | <input type="radio"/> | ___liang/time |
| pumpkin             | <input type="radio"/> | <input type="radio"/> | <input type="radio"/> | <input type="radio"/> | <input type="radio"/> | ___liang/time |
| garlic              | <input type="radio"/> | <input type="radio"/> | <input type="radio"/> | <input type="radio"/> | <input type="radio"/> | ___liang/time |
| green Chinese onion | <input type="radio"/> | <input type="radio"/> | <input type="radio"/> | <input type="radio"/> | <input type="radio"/> | ___liang/time |
| onion               | <input type="radio"/> | <input type="radio"/> | <input type="radio"/> | <input type="radio"/> | <input type="radio"/> | ___liang/time |
| ginger              | <input type="radio"/> | <input type="radio"/> | <input type="radio"/> | <input type="radio"/> | <input type="radio"/> | ___liang/time |
| turmeric            | <input type="radio"/> | <input type="radio"/> | <input type="radio"/> | <input type="radio"/> | <input type="radio"/> | ___liang/time |
| celery cabbage      | <input type="radio"/> | <input type="radio"/> | <input type="radio"/> | <input type="radio"/> | <input type="radio"/> | ___liang/time |
| broccoli            | <input type="radio"/> | <input type="radio"/> | <input type="radio"/> | <input type="radio"/> | <input type="radio"/> | ___liang/time |
| spinach             | <input type="radio"/> | <input type="radio"/> | <input type="radio"/> | <input type="radio"/> | <input type="radio"/> | ___liang/time |
| coriander           | <input type="radio"/> | <input type="radio"/> | <input type="radio"/> | <input type="radio"/> | <input type="radio"/> | ___liang/time |
| pepper              | <input type="radio"/> | <input type="radio"/> | <input type="radio"/> | <input type="radio"/> | <input type="radio"/> | ___liang/time |

|                              |                       |                       |                       |                       |                       |               |
|------------------------------|-----------------------|-----------------------|-----------------------|-----------------------|-----------------------|---------------|
| potato                       | <input type="radio"/> | <input type="radio"/> | <input type="radio"/> | <input type="radio"/> | <input type="radio"/> | ___liang/time |
| vermicelli                   | <input type="radio"/> | <input type="radio"/> | <input type="radio"/> | <input type="radio"/> | <input type="radio"/> | ___liang/time |
| sweet potato                 | <input type="radio"/> | <input type="radio"/> | <input type="radio"/> | <input type="radio"/> | <input type="radio"/> | ___liang/time |
| soybean                      | <input type="radio"/> | <input type="radio"/> | <input type="radio"/> | <input type="radio"/> | <input type="radio"/> | ___liang/time |
| soybean milk powder          | <input type="radio"/> | <input type="radio"/> | <input type="radio"/> | <input type="radio"/> | <input type="radio"/> | ___liang/time |
| bean curd                    | <input type="radio"/> | <input type="radio"/> | <input type="radio"/> | <input type="radio"/> | <input type="radio"/> | ___liang/time |
| skin of soya-bean milk       | <input type="radio"/> | <input type="radio"/> | <input type="radio"/> | <input type="radio"/> | <input type="radio"/> | ___liang/time |
| mung bean                    | <input type="radio"/> | <input type="radio"/> | <input type="radio"/> | <input type="radio"/> | <input type="radio"/> | ___liang/time |
| Broad bean                   | <input type="radio"/> | <input type="radio"/> | <input type="radio"/> | <input type="radio"/> | <input type="radio"/> | ___liang/time |
| chickpea                     | <input type="radio"/> | <input type="radio"/> | <input type="radio"/> | <input type="radio"/> | <input type="radio"/> | ___liang/time |
| <b><u>Fresh fruits</u></b>   | <input type="radio"/> | <input type="radio"/> | <input type="radio"/> | <input type="radio"/> | <input type="radio"/> | ___liang/time |
| apple                        | <input type="radio"/> | <input type="radio"/> | <input type="radio"/> | <input type="radio"/> | <input type="radio"/> | ___liang/time |
| pear                         | <input type="radio"/> | <input type="radio"/> | <input type="radio"/> | <input type="radio"/> | <input type="radio"/> | ___liang/time |
| grape                        | <input type="radio"/> | <input type="radio"/> | <input type="radio"/> | <input type="radio"/> | <input type="radio"/> | ___liang/time |
| orange                       | <input type="radio"/> | <input type="radio"/> | <input type="radio"/> | <input type="radio"/> | <input type="radio"/> | ___liang/time |
| banana                       | <input type="radio"/> | <input type="radio"/> | <input type="radio"/> | <input type="radio"/> | <input type="radio"/> | ___liang/time |
| <b><u>Dairy products</u></b> |                       |                       |                       |                       |                       |               |
| milk                         | <input type="radio"/> | <input type="radio"/> | <input type="radio"/> | <input type="radio"/> | <input type="radio"/> | ___ml/time    |
| mare's milk                  | <input type="radio"/> | <input type="radio"/> | <input type="radio"/> | <input type="radio"/> | <input type="radio"/> | ___ml/time    |
| ewe's milk                   | <input type="radio"/> | <input type="radio"/> | <input type="radio"/> | <input type="radio"/> | <input type="radio"/> | ___ml/time    |
| Yogurt (solidified/liquid)   | <input type="radio"/> | <input type="radio"/> | <input type="radio"/> | <input type="radio"/> | <input type="radio"/> | ___ml/time    |
| Cream                        | <input type="radio"/> | <input type="radio"/> | <input type="radio"/> | <input type="radio"/> | <input type="radio"/> | ___liang/time |
| butter                       | <input type="radio"/> | <input type="radio"/> | <input type="radio"/> | <input type="radio"/> | <input type="radio"/> | ___liang/time |
| Vrum                         | <input type="radio"/> | <input type="radio"/> | <input type="radio"/> | <input type="radio"/> | <input type="radio"/> | ___liang/time |
| tea with milk                | <input type="radio"/> | <input type="radio"/> | <input type="radio"/> | <input type="radio"/> | <input type="radio"/> | ___ml/time    |
| buttered tea                 | <input type="radio"/> | <input type="radio"/> | <input type="radio"/> | <input type="radio"/> | <input type="radio"/> | ___ml/time    |
| <b><u>Other food</u></b>     |                       |                       |                       |                       |                       |               |
| pickles                      | <input type="radio"/> | <input type="radio"/> | <input type="radio"/> | <input type="radio"/> | <input type="radio"/> | ___liang/time |

|                     |                       |                       |                       |                       |                       |               |
|---------------------|-----------------------|-----------------------|-----------------------|-----------------------|-----------------------|---------------|
| dried vegetable     | <input type="radio"/> | <input type="radio"/> | <input type="radio"/> | <input type="radio"/> | <input type="radio"/> | ___liang/time |
| nut                 | <input type="radio"/> | <input type="radio"/> | <input type="radio"/> | <input type="radio"/> | <input type="radio"/> | ___liang/time |
| walnut              | <input type="radio"/> | <input type="radio"/> | <input type="radio"/> | <input type="radio"/> | <input type="radio"/> | ___liang/time |
| peanut              | <input type="radio"/> | <input type="radio"/> | <input type="radio"/> | <input type="radio"/> | <input type="radio"/> | ___liang/time |
| red dates           | <input type="radio"/> | <input type="radio"/> | <input type="radio"/> | <input type="radio"/> | <input type="radio"/> | ___liang/time |
| Matrimony vine      | <input type="radio"/> | <input type="radio"/> | <input type="radio"/> | <input type="radio"/> | <input type="radio"/> | ___liang/time |
| raisin              | <input type="radio"/> | <input type="radio"/> | <input type="radio"/> | <input type="radio"/> | <input type="radio"/> | ___liang/time |
| Other dried fruit   | <input type="radio"/> | <input type="radio"/> | <input type="radio"/> | <input type="radio"/> | <input type="radio"/> | ___liang/time |
| Candy and Chocolate | <input type="radio"/> | <input type="radio"/> | <input type="radio"/> | <input type="radio"/> | <input type="radio"/> | ___liang/time |
| cakes and pastries  | <input type="radio"/> | <input type="radio"/> | <input type="radio"/> | <input type="radio"/> | <input type="radio"/> | ___liang/time |

### **Soft drinks**

|                                                |                       |                       |                       |                       |                       |            |
|------------------------------------------------|-----------------------|-----------------------|-----------------------|-----------------------|-----------------------|------------|
| soybean milk                                   | <input type="radio"/> | <input type="radio"/> | <input type="radio"/> | <input type="radio"/> | <input type="radio"/> | ___ml/time |
| Pure juice/vegetable juice<br>(No added sugar) | <input type="radio"/> | <input type="radio"/> | <input type="radio"/> | <input type="radio"/> | <input type="radio"/> | ___ml/time |
| sodas                                          | <input type="radio"/> | <input type="radio"/> | <input type="radio"/> | <input type="radio"/> | <input type="radio"/> | ___ml/time |
| Other sugary drinks                            | <input type="radio"/> | <input type="radio"/> | <input type="radio"/> | <input type="radio"/> | <input type="radio"/> | ___ml/time |
| Wine (indicating<br>category)                  | <input type="radio"/> | <input type="radio"/> | <input type="radio"/> | <input type="radio"/> | <input type="radio"/> | ___ml/time |
| coffee                                         | <input type="radio"/> | <input type="radio"/> | <input type="radio"/> | <input type="radio"/> | <input type="radio"/> | ___ml/time |
| Red/green tea                                  | <input type="radio"/> | <input type="radio"/> | <input type="radio"/> | <input type="radio"/> | <input type="radio"/> | ___ml/time |

### **Mushroom fungus**

|                   |                       |                       |                       |                       |                       |               |
|-------------------|-----------------------|-----------------------|-----------------------|-----------------------|-----------------------|---------------|
| needle mushroom   | <input type="radio"/> | <input type="radio"/> | <input type="radio"/> | <input type="radio"/> | <input type="radio"/> | ___liang/time |
| Porcini mushrooms | <input type="radio"/> | <input type="radio"/> | <input type="radio"/> | <input type="radio"/> | <input type="radio"/> | ___liang/time |
| mushroom          | <input type="radio"/> | <input type="radio"/> | <input type="radio"/> | <input type="radio"/> | <input type="radio"/> | ___liang/time |
| agaric            | <input type="radio"/> | <input type="radio"/> | <input type="radio"/> | <input type="radio"/> | <input type="radio"/> | ___liang/time |
| dried mushroom    | <input type="radio"/> | <input type="radio"/> | <input type="radio"/> | <input type="radio"/> | <input type="radio"/> | ___liang/time |
| kelp              | <input type="radio"/> | <input type="radio"/> | <input type="radio"/> | <input type="radio"/> | <input type="radio"/> | ___liang/time |
| nori              | <input type="radio"/> | <input type="radio"/> | <input type="radio"/> | <input type="radio"/> | <input type="radio"/> | ___liang/time |

## 5.2 What the difference between your favorite tastes compare to those of your friends or colleagues?

☐ very light

☐ not salty not light

☐ partial salty taste

## 5.3 In the past year, approximately how often have you been present with the following food/diet ?

| characteristics food | Everyday | 4-6<br>times/week | 1-3<br>times/week | 1-3<br>times/month | No/<br>very little | amount of<br>each serving |
|----------------------|----------|-------------------|-------------------|--------------------|--------------------|---------------------------|
|----------------------|----------|-------------------|-------------------|--------------------|--------------------|---------------------------|

|                             |                       |                       |                       |                       |                       |               |
|-----------------------------|-----------------------|-----------------------|-----------------------|-----------------------|-----------------------|---------------|
| naan bread                  | <input type="radio"/> | <input type="radio"/> | <input type="radio"/> | <input type="radio"/> | <input type="radio"/> | ___ml/time    |
| Assorted Chinese Herbal Tea | <input type="radio"/> | <input type="radio"/> | <input type="radio"/> | <input type="radio"/> | <input type="radio"/> | ___ml/time    |
| herb tea                    | <input type="radio"/> | <input type="radio"/> | <input type="radio"/> | <input type="radio"/> | <input type="radio"/> | ___ml/time    |
| saffron crocus              | <input type="radio"/> | <input type="radio"/> | <input type="radio"/> | <input type="radio"/> | <input type="radio"/> | ___liang/time |

### Grease

|                    |                       |                       |                       |                       |                       |               |
|--------------------|-----------------------|-----------------------|-----------------------|-----------------------|-----------------------|---------------|
| animal oil         | <input type="radio"/> | <input type="radio"/> | <input type="radio"/> | <input type="radio"/> | <input type="radio"/> | ___liang/time |
| colza oil          | <input type="radio"/> | <input type="radio"/> | <input type="radio"/> | <input type="radio"/> | <input type="radio"/> | ___liang/time |
| peanut oil         | <input type="radio"/> | <input type="radio"/> | <input type="radio"/> | <input type="radio"/> | <input type="radio"/> | ___liang/time |
| soya-bean oil      | <input type="radio"/> | <input type="radio"/> | <input type="radio"/> | <input type="radio"/> | <input type="radio"/> | ___liang/time |
| linseed oil        | <input type="radio"/> | <input type="radio"/> | <input type="radio"/> | <input type="radio"/> | <input type="radio"/> | ___liang/time |
| blend oil          | <input type="radio"/> | <input type="radio"/> | <input type="radio"/> | <input type="radio"/> | <input type="radio"/> | ___liang/time |
| sunflower seed oil | <input type="radio"/> | <input type="radio"/> | <input type="radio"/> | <input type="radio"/> | <input type="radio"/> | ___liang/time |
| corn oil           | <input type="radio"/> | <input type="radio"/> | <input type="radio"/> | <input type="radio"/> | <input type="radio"/> | ___liang/time |
| olive oil          | <input type="radio"/> | <input type="radio"/> | <input type="radio"/> | <input type="radio"/> | <input type="radio"/> | ___liang/time |
| tea-seed oil       | <input type="radio"/> | <input type="radio"/> | <input type="radio"/> | <input type="radio"/> | <input type="radio"/> | ___liang/time |

### Specific eating behavior

|                                                   | Everyday              | 4-6<br>times/week     | 1-3<br>times/week     | 1-3<br>times/month    | No/<br>very little    |
|---------------------------------------------------|-----------------------|-----------------------|-----------------------|-----------------------|-----------------------|
| snack                                             | <input type="radio"/> | <input type="radio"/> | <input type="radio"/> | <input type="radio"/> | <input type="radio"/> |
| Eat instant<br>noodles/convenient rice<br>noodles | <input type="radio"/> | <input type="radio"/> | <input type="radio"/> | <input type="radio"/> | <input type="radio"/> |
| night snack                                       | <input type="radio"/> | <input type="radio"/> | <input type="radio"/> | <input type="radio"/> | <input type="radio"/> |
| bacon/bacon                                       | <input type="radio"/> | <input type="radio"/> | <input type="radio"/> | <input type="radio"/> | <input type="radio"/> |
| ham/sausage and other<br>processing               | <input type="radio"/> | <input type="radio"/> | <input type="radio"/> | <input type="radio"/> | <input type="radio"/> |
| skip breakfast                                    | <input type="radio"/> | <input type="radio"/> | <input type="radio"/> | <input type="radio"/> | <input type="radio"/> |
| Eat Fried food                                    | <input type="radio"/> | <input type="radio"/> | <input type="radio"/> | <input type="radio"/> | <input type="radio"/> |

|                                  |                       |                       |                       |                       |                       |
|----------------------------------|-----------------------|-----------------------|-----------------------|-----------------------|-----------------------|
| Eat barbecue food                | <input type="radio"/> | <input type="radio"/> | <input type="radio"/> | <input type="radio"/> | <input type="radio"/> |
| Eat Western fast food)           | <input type="radio"/> | <input type="radio"/> | <input type="radio"/> | <input type="radio"/> | <input type="radio"/> |
| Eat in a restaurant or snack bar | <input type="radio"/> | <input type="radio"/> | <input type="radio"/> | <input type="radio"/> | <input type="radio"/> |

**5.4 In the past year, have you taken any of the following supplements for at least one month?**

**no      yes**

- |                       |                       |                   |
|-----------------------|-----------------------|-------------------|
| <input type="radio"/> | <input type="radio"/> | Fish oil          |
| <input type="radio"/> | <input type="radio"/> | vitamin           |
| <input type="radio"/> | <input type="radio"/> | Calcium/iron/zinc |
| <input type="radio"/> | <input type="radio"/> | Ginseng           |
| <input type="radio"/> | <input type="radio"/> | other             |

**5.5 How often have you eaten spicy food in the past year?**

- ☐ Never } ➔ To select these two items, go to question 5.7.
- ☐ Occasionally, but less than once a week
- ☐ 1 to 2 times per week
- ☐ 3-5 times a week
- ☐ Every day or almost every day

**5.6 When do you start eating spicy food every week?**      \_\_\_\_ year

**5.7 How often have you eaten vinegar in the past year?**

- |                                                               |                                                                      |
|---------------------------------------------------------------|----------------------------------------------------------------------|
| <input type="radio"/> Never                                   | } ➔ If these two items are selected, the dietary survey is now over. |
| <input type="radio"/> Occasionally, but less than once a week |                                                                      |
| <input type="radio"/> 1 to 2 times per week                   |                                                                      |
| <input type="radio"/> 3-5 times a week                        |                                                                      |

☐ Every day or almost every day

**5.8 When you had the habit of eating vinegar? \_\_\_\_ year**

**5.9 What do you think of your preference for vinegar?**

☐ very much      ☐ like better      ☐ common      ☐ Dislike

**6. Personal and family health status** (Please tick ✓ on the appropriate box○, Please fill in the information in the\_\_\_\_ as require )

**6.1 What is your present state of health?**

**6.1.1 Self-Evaluation ?**

well ○  
better ○  
common ○  
poor ○

**6.1.2 Compare yourself to your peers ?**

better ○  
same ○  
worse ○  
unaware ○

**6.2 How many times have you been hospitalized due to illness in the past year?(If not, please fill in 00)** \_\_\_\_\_times

**6.3 Have you ever been diagnosed by a doctor in a village/district hospital or above with any of the following diseases?** ○ Yes ○ No

| Disease                                                        | Are you sick? Age at first diagnosis? | receive treatment? | Is still receiving medical treatment | Have you ever been in hospital? If yes, date of last hospitalization |
|----------------------------------------------------------------|---------------------------------------|--------------------|--------------------------------------|----------------------------------------------------------------------|
| Diabetes                                                       | ○ _____                               | ○                  | ○                                    | ○ _____                                                              |
| Acute myocardial infarction (a type of coronary heart disease) | ○ _____                               | ○                  | ○                                    | ○ _____                                                              |
| Angina pectoris (a form of coronary heart disease)             | ○ _____                               | ○                  | ○                                    | ○ _____                                                              |
| Other ischemic heart attacks stroke/stroke in infants          | ○ _____                               | ○                  | ○                                    | ○ _____                                                              |
| hypertension                                                   | ○ _____                               | ○                  | ○                                    | ○ _____                                                              |
| pulmonary heart disease                                        | ○ _____                               | ○                  | ○                                    | ○ _____                                                              |
| rheumatic heart disease                                        | ○ _____                               | ○                  | ○                                    | ○ _____                                                              |
| tuberculosis                                                   | ○ _____                               | ○                  | ○                                    | ○ _____                                                              |
| emphysema                                                      | ○ _____                               | ○                  | ○                                    | ○ _____                                                              |
| chronic bronchitis                                             | ○ _____                               | ○                  | ○                                    | ○ _____                                                              |
| chronic obstructive pulmonary disease                          | ○ _____                               | ○                  | ○                                    | ○ _____                                                              |
| asthma                                                         | ○ _____                               | ○                  | ○                                    | ○ _____                                                              |
| Chronic hepatitis/cirrhosis                                    | ○ _____                               | ○                  | ○                                    | ○ _____                                                              |
| peptic ulcer                                                   | ○ _____                               | ○                  | ○                                    | ○ _____                                                              |
| Gallstones/cholecystitis                                       | ○ _____                               | ○                  | ○                                    | ○ _____                                                              |
| chronic nephrosis                                              | ○ _____                               | ○                  | ○                                    | ○ _____                                                              |
| osteoporosis                                                   | ○ _____                               | ○                  | ○                                    | ○ _____                                                              |
| fracture                                                       | ○ _____                               | ○                  | ○                                    | ○ _____                                                              |
| rheumatic arthritis                                            | ○ _____                               | ○                  | ○                                    | ○ _____                                                              |
| depressive disorder                                            | ○ _____                               | ○                  | ○                                    | ○ _____                                                              |

|                        |                       |       |                       |                       |                       |       |
|------------------------|-----------------------|-------|-----------------------|-----------------------|-----------------------|-------|
| anxiety                | <input type="radio"/> | _____ | <input type="radio"/> | <input type="radio"/> | <input type="radio"/> | _____ |
| neurasthenia           | <input type="radio"/> | _____ | <input type="radio"/> | <input type="radio"/> | <input type="radio"/> | _____ |
| Other mental disorders | <input type="radio"/> | _____ | <input type="radio"/> | <input type="radio"/> | <input type="radio"/> | _____ |
| cerebral trauma        | <input type="radio"/> | _____ | <input type="radio"/> | <input type="radio"/> | <input type="radio"/> | _____ |
| Other                  | <input type="radio"/> | _____ | <input type="radio"/> | <input type="radio"/> | <input type="radio"/> | _____ |
| malignant tumor *      | <input type="radio"/> | _____ | <input type="radio"/> | <input type="radio"/> | <input type="radio"/> | _____ |

\* If there is a tumor, please indicate the specific site in the box: (If there is more than one site, please select the site of the initial tumor)

- |                                    |                                 |                               |                             |                                  |                              |                                |
|------------------------------------|---------------------------------|-------------------------------|-----------------------------|----------------------------------|------------------------------|--------------------------------|
| <input type="radio"/> lung         | <input type="radio"/> esophagus | <input type="radio"/> stomach | <input type="radio"/> liver | <input type="radio"/> intestines | <input type="radio"/> breast | <input type="radio"/> prostate |
| <input type="radio"/> cervix uteri | <input type="radio"/> other     |                               |                             |                                  |                              |                                |

**7. Physical activity** (Please tick ✓ on the appropriate box○, Please fill in the information in the\_\_\_\_ as require)

**7.1 In the past year, What kind of activity does your job focus on ?**

- ☐ A sedentary occupation (e.g. an administrator, a secretary, etc.)
- ☐ To stand primarily (e.g. shop assistant, guard, etc.)
- ☐ General physical work
- ☐ To heavy physical labor mainly
- ☐ Retired or housework, unemployed for more than one year or physically disabled cannot work normally

**7.2 How many days a week do you work on average? \_\_\_\_ day**

**7.3 How many hours do you work on average every day? \_\_\_\_ hour**

**7.4 In the past year, how did you usually get to or from work?**

- ☐ walk ☐ by motorcycle
- ☐ by bike ☐ Private car/For hire
- ☐ Public transport (buses, subways, ferries)
- ☐ Usually works at home or near home

**7.5 How much time do you spend commuting each day to and from work? \_\_\_\_minutes**

**7.6 In the past year, how often did you take part in physical exercise in your spare time?**

- ☐ never or almost never attend
- ☐ 1-3 times a month
- ☐ 1-2 times a week
- ☐ 3-5 times a week
- ☐ Exercise every day or almost every day

**7.7 What is your most common form of exercise?**

- ☐ walking/yoga
- ☐ Running/aerobics
- ☐ Ball games (basketball, table tennis, badminton, etc.)
- ☐ Go for a brisk walk/Yanko dance/square dance
- ☐ others

**7.8 What is the cumulative number of hours per week that you participated in amateur physical activity over the past year? \_\_\_\_hours/week**

**7.9 What is the average cumulative number of hours per week that you engage in similar strenuous physical activity? \_\_\_\_ hours/week**

**7.10 How many time do you spend on various household chores (including childcare) on average every day? \_\_\_\_ hours/day**

**7.11 How many hours per day do you spend in static activities (including watching TV, mobile phone /Pad, reading, eating, gathering, playing chess, CARDS, playing video games, surfing the Internet, knitting, etc.)? \_\_\_\_\_ hours/day**
