# Supplementary material for: Association between Dietary Inflammatory Index and Type 2 diabetes mellitus in Xinjiang Uyghur autonomous region, China
Source: PeerJ journal article supplement (doi:10.7717/peerj.11159), 2021-07-16
Supplement: Supplemental_File_5.pdf [file Supplemental_File_5.pdf]

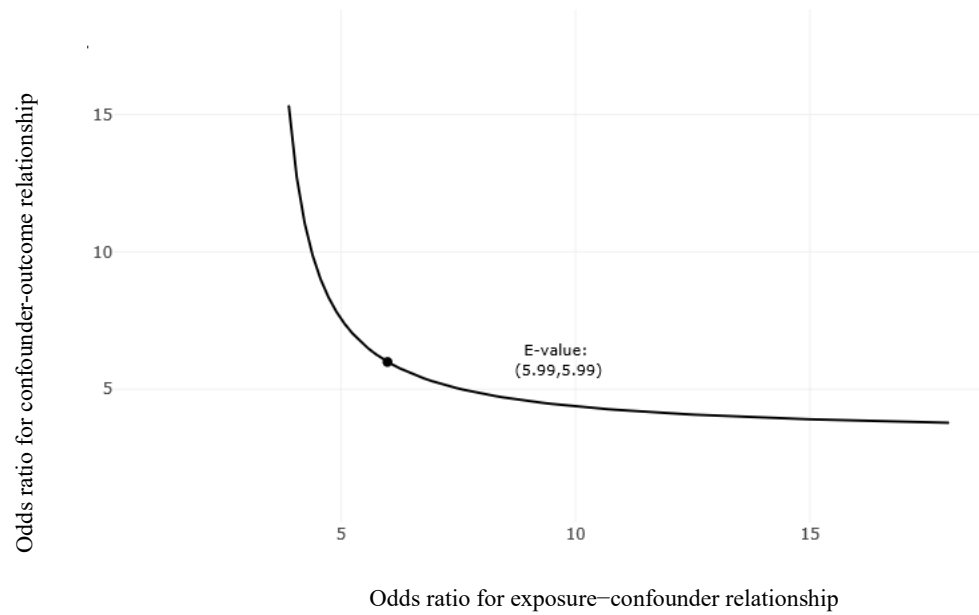

**Figure 4: To compute the E-value for this odds ratio.**

We input the point estimate (3.27) and the lower and upper confidence limits (2.38 and 4.50, respectively).
